# Supplementary material
Source: PubMed Central journal article supplement (PMC5484002)
Supplement: NIHMS792011-supplement-4.pdf [file NIHMS792011-supplement-4.pdf]

|       | TC-71 | A673 | SK-PN- DW | SK-N-MC | RD-ES | FU-UR1        | JN-DSRCT -1 | DDLS        | SK-N-BE2-C    | NCI-H2030 | NCI-H3255 | HCT116   | HL-60 | K562 | SW1736     | U-87MG |
|-------|-------|------|-----------|---------|-------|---------------|-------------|-------------|---------------|-----------|-----------|----------|-------|------|------------|--------|
|       | EWS   | EWS  | EWS       | EWS     | EWS   | Renal Cell CA | DSRCT       | Liposarcoma | Neuroblastoma | Lung CA   | Lung CA   | Colon CA | APML  | CML  | Thyroid CA | Glioma |
| EWS-A | 0.02  | 0.06 | 0.11      | 0.02    | 0.01  | 2.43          | 0.05        | 1.78        | 0.24          | 0.23      | 0.91      | 0.28     | 0.06  | 0.56 | 0.06       | 1.87   |
| EWS-B | 0.09  | 0.09 | 0.12      | 0.01    | 0.05  | 0.29          | 0.01        | 0.1         | 0.01          | 0.02      | 0.1       | 0.01     | 0.08  | 0.02 | 0.07       | 0.12   |
| EWS-C | 0.12  | 0.11 | 0.09      | 0.12    | 0.07  | 0.28          | 0.24        | 0.29        | 0.04          | 0.03      | 0.06      | 0.07     | 0.06  | 0.05 | 0.02       | 0.51   |
| EWS-D | 0.21  | 0.19 | 0.17      | 0.04    | 0.13  | 2.4           | 0.21        | 1.35        | 0.73          | 0.52      | 0.76      | 0.44     | 0.08  | 0.43 | 0.15       | 1.07   |
| EWS-E | 0.21  | 0.3  | 0.82      | 0.08    | 0.14  | 0.94          | 0.15        | 2.9         | 2.47          | 1.97      | 1.09      | 1.16     | 0.76  | 2.97 | 0.09       | 4.23   |
| EWS-F | 0.22  | 0.1  | 0.15      | 0.01    | 0.13  | 0.36          | 0.04        | 0.22        | 0.2           | 0.09      | 0.07      | 0.08     | 0.13  | 0.1  | 0.12       | 0.31   |
| EWS-G | 0.23  | 0.18 | 0.25      | 0.07    | 0.1   | 0.68          | 0.16        | 0.48        | 0.36          | 0.12      | 1.25      | 0.09     | 0.19  | 0.14 | 0.2        | 0.07   |
| EWS-H | 0.23  | 0.39 | 0.79      | 0.07    | 0.18  | 0.55          | 0.18        | 1.74        | 0.37          | 0.71      | 0.55      | 0.54     | 0.72  | 0.95 | 0.06       | 3.16   |
| EWS-I | 0.33  | 0.26 | 0.22      | 0.28    | 0.17  | 0.5           | 0.83        | 1.05        | 0.13          | 0.08      | 0.17      | 0.11     | 0.17  | 0.15 | 0.05       | 0.55   |
| EWS-J | 0.34  | 0.2  | 0.2       | 0.14    | 0.16  | 0.84          | 0.41        | 0.43        | 0.42          | 0.52      | 0.69      | 0.25     | 0.28  | 0.98 | 0.52       | 0.78   |
| EWS-K | 0.35  | 0.23 | 0.83      | 0.06    | 0.15  | >10.0         | 2.87        | 0.39        | 0.99          | 0.39      | 2.38      | 0.27     | 3.01  | 0.48 | 0.09       | 0.66   |
| EWS-L | 0.47  | 0.17 | 0.44      | 0.14    | 0.13  | 1.77          | 0.34        | 2.88        | 0.28          | 0.18      | 0.4       | 0.13     | 0.12  | 1.01 | 0.07       | 3.67   |
| EWS-M | 0.48  | 0.52 | 0.48      | 0.23    | 0.39  | 1.13          | 0.87        | 0.46        | 0.28          | 0.43      | 0.48      | 0.23     | 0.52  | 0.51 | 0.18       | 1.13   |
| EWS-N | 0.49  | 0.58 | 0.78      | 0.17    | 0.26  | 2.33          | 0.29        | 0.63        | 0.3           | 0.65      | 1.15      | 0.57     | 0.46  | 0.89 | 0.11       | 0.82   |
| EWS-O | 0.52  | 0.28 | 0.3       | 0.11    | 0.42  | 0.72          | 0.09        | 0.23        | 0.1           | 0.22      | 0.14      | 0.21     | 0.57  | 0.23 | 0.23       | 0.42   |
| EWS-P | 0.71  | 0.44 | 0.55      | 0.22    | 0.4   | 1.26          | 0.74        | 0.64        | 0.55          | 0.56      | 1.13      | 1.28     | 0.54  | 1    | 0.87       | 1.58   |
| EWS-Q | 0.75  | 0.71 | 0.35      | 0.1     | ND    | 7.32          | 0.7         | 2.56        | 3.17          | 1.6       | 3.74      | 1.48     | 0.36  | 1.27 | 2.82       | 1.54   |
| EWS-R | 0.75  | 0.38 | 0.47      | 0.2     | 0.43  | 2.45          | 0.8         | 1.26        | 0.37          | 0.75      | 0.65      | 0.44     | 0.67  | 0.76 | 0.38       | 2.73   |
| EWS-S | 0.8   | 0.47 | 0.45      | 0.42    | 0.45  | 2.46          | 0.78        | 2.49        | 1.07          | 1.03      | 1.44      | 0.87     | 0.77  | 0.77 | 1.13       | 2.29   |
| EWS-T | 0.86  | 0.41 | 0.57      | 0.26    | 0.33  | 2.76          | 0.83        | 1.48        | 0.46          | 1         | 1         | 0.45     | 0.82  | 0.83 | 0.33       | 3.56   |
| EWS-U | 0.87  | 0.51 | 0.66      | 0.3     | 0.55  | 2.35          | 0.86        | 1.27        | 0.39          | 0.7       | 1.49      | 0.38     | 0.85  | 1.19 | 0.82       | 3.91   |
| EWS-W | 0.88  | 0.65 | 0.7       | 0.23    | 0.73  | 1.23          | 1.21        | 1.37        | 0.68          | 0.89      | 1.5       | 0.6      | 1.08  | 1.14 | 0.73       | 1.49   |
| EWS-X | 0.96  | 0.41 | 0.59      | 0.1     | 0.52  | 1.88          | 0.36        | 1.51        | 2.54          | 1.1       | 1.62      | 0.88     | 0.62  | 0.76 | 1.22       | 1.18   |

**Table S1. IC<sub>50</sub> levels of 23 lead compounds against EWS and non-EWS cell lines. 72 hour IC<sub>50</sub> growth inhibition levels (μM) of 23 compounds (labeled EWS-A through EWS-X) against five EWS cell lines and 11 non-EWS cell lines**
