# Supplementary material
Source: PubMed Central journal article supplement (PMC5484002)
Supplement: NIHMS792011-supplement-5.pdf [file NIHMS792011-supplement-5.pdf]

| COMPOUND           | STRUCTURE                                                                           | IC <sub>50</sub> FOR GROWTH INHIBITION (μM) |        |       |       |       |
|--------------------|-------------------------------------------------------------------------------------|---------------------------------------------|--------|-------|-------|-------|
|                    |                                                                                     | A673                                        | CHP100 | TC-32 | TC-71 | HepG2 |
| EWS-P              | 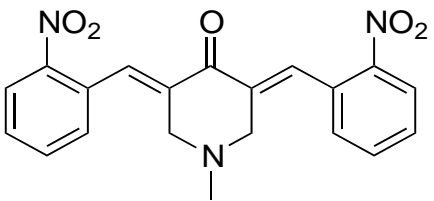   |                                             | 0.2    |       | 0.2   | >100  |
| EWS-W              |    |                                             | 0.2    |       | 0.25  |       |
| MSK-EWS-5 (b-AP15) |    | 0.02                                        | 0.05   | 0.02  | 0.03  | >10   |
| MSK-EWS-4          |   | ND                                          | >10    | >10   | ND    | ND    |
| VLX1570            |  | 0.01                                        | 0.03   | 0.03  | 0.03  | ND    |

**Table S2. Structure and activity of piperidione analogs.** Cell lines were treated with the indicated compounds for 96 h and then growth determined. Results represent the mean  $\pm$  SD of 2-4 experiments in which each condition was assayed in triplicate.
