# Supplementary material
Source: PubMed Central journal article supplement (PMC5484002)
Supplement: NIHMS792011-supplement-7.pdf [file NIHMS792011-supplement-7.pdf]

Supplemental Table 4

## Ingenuity Pathway Analysis of Genome-wide shRNA Library Screen

| Networks                                                                                                                     | Molecules in Network                                                                                                                                                                                                                                                                                                                                                                                                                                                                                | Score             |                                                                                                                                                                                                                                                 |
|------------------------------------------------------------------------------------------------------------------------------|-----------------------------------------------------------------------------------------------------------------------------------------------------------------------------------------------------------------------------------------------------------------------------------------------------------------------------------------------------------------------------------------------------------------------------------------------------------------------------------------------------|-------------------|-------------------------------------------------------------------------------------------------------------------------------------------------------------------------------------------------------------------------------------------------|
| Top Diseases and Functions                                                                                                   |                                                                                                                                                                                                                                                                                                                                                                                                                                                                                                     |                   |                                                                                                                                                                                                                                                 |
| Cellular Growth and Proliferation, Cell Cycle, Cellular Development                                                          | BAI3,BAP1,BCAS2,CDKN3,CUL7,Cyclin B,CYL2,DLG1,DUSP4,FBX05,FBXW8,FDP5,FZD8,GLMN,GSR,KSR1,MCM6,MCRS1,MGST2,P-TEFb,PPP1CC,PRPF19,RFLL1,RGS13,RFNF34,RPL111,RL23,SUPT5H,TP53,TP73,TP53,TRIM22,UCL1,1,VWOX,ZFP361                                                                                                                                                                                                                                                                                        | 45                |                                                                                                                                                                                                                                                 |
| Cell Death and Survival, Digestive System Development and Function, Organismal Development                                   | BAG4,BCL2L1,BCL2L1,BCL7B,BCR (complex),caspase CD83,CPNE4,DDOST,FCER1A,GPX4,IFN Beta,Igm,Interferon,Ala,LARGE,LPXN,LTBR,M6PR,NFKB2,NFKB (complex),NGFR,NPC1,NR0B2,PPP2R5E,RNF141,RRML1,RL6,SPRY1,SPRY2,TLR9,TRAF1,TRIM13,TRC2D3,ZNF366                                                                                                                                                                                                                                                              | 34                |                                                                                                                                                                                                                                                 |
| Lipid Metabolism, Small Molecule Biochemistry, Cell Death and Survival                                                       | ABCC4,AK1,APLNR,APOB,ARHGEF4,B4GALT5,BECN1,C4A,C4B,CKXBR,CD36,CLNS1A,DDX47,Growth hormone,HNRNP1A1,HSF1,Hsp27,Hsp70,Hsp90,KIR2DS4 (includes others),KIR3DL1,KN2T2,LDL,LDLR,NEUS,PKK (complex),PKK (family),PLCG2,RC3TOR,SCAR1,SELE,SEU,AD,SNRP1,TAF11,TPN1,TUBA1C,AGTR2,BMP7,caldesin,CASP14,Caspase 3/7,Cg,Collagen(s),CSF2RA,EDN1,ESPL1,FASLG,FBLN2,FCGR2B,FJX1,FST,FAGTAB,Gm-csf,HSD3B1,IgG,IL1L1,IL12 (complex),MMP2,MRC1,P38,MAPK,PIA51,Rnr,RP53,RP524,RP5A,SRSF9,STAT2,TGFB1,Vegf,VIPR1,ZFP36 | 32                |                                                                                                                                                                                                                                                 |
| Gene Expression, Inflammatory Disease, Connective Tissue Disorders                                                           | ADCY,AKAP1,Ap1,ARHGFEF,CCL27,CD3,CD39,CLC4C,CDP4,DUSP6,EDNR,ENPP1,ERK,ERK1/2,F                                                                                                                                                                                                                                                                                                                                                                                                                      | 28                |                                                                                                                                                                                                                                                 |
| Cellular Assembly and Organization, Cellular Function and Maintenance, Tissue Development                                    | Actin,Fibronectin,GN11,IGKAP1,LCF2,LEP,MAPK,MEK,NCK1,NMUR1,Pka,PKA2,PPP2R2A,PSM56,PSMB8,RAP1A,SIAMH,STAH,TCR,THY1,TNFSF8,AHSP,CDCP1,COL4A6,Creb,CXCL1,CXCL2,ERCC8,ERMAP,estrogen receptor,Focal adhesion kinase,GB3,GPT,Histone h3,Histone h4,HLA-DQB1,HLA-DRB1,HTATSF1,ICAM3,IDI1,IFNL1,IL10R8,Immunoglobulin,LMO4,LOXL2,MCM3,MED20,p85 (pak3r),RBBP8,RNA polymerase                                                                                                                               | 26                |                                                                                                                                                                                                                                                 |
| Neurological Disease, Psychological Disorders, Cell-To-Cell Signaling and Interaction                                        | ILRPL10A,SP3B2,SPTA1,STAT5ab,TJP3,UBC                                                                                                                                                                                                                                                                                                                                                                                                                                                               | 23                |                                                                                                                                                                                                                                                 |
| Embryonic Development, Organismal Development, Cellular Assembly and Organization                                            | BCL2,BCL2L1,BNIP1,BRE,CHST12,CLASP1,CPD,CRTA1,DLX3,ETS2,FBX08,FUT9,GOS2,GADD45B,GLA,GREM1,HGFAC,HNF1A,HS3ST3B1,IL136RN,MAFF,NAPAN,EFM,PLA2G1B,PPP1R1A,PSEN1,PSMD7,RAB35,SDB5,SEC2B,STOX1,TNF,TREM1,VAMP3,ZNF155                                                                                                                                                                                                                                                                                     | 20                |                                                                                                                                                                                                                                                 |
| Inflammatory Response, Humoral Immune Response, Protein Synthesis                                                            | ACO2,ATIC,BCL6,C1QA,C1QC,CD48,CD72,CRBN,CTSC,EPB41L2,FCER1G,FCGR7,FGD2,FUT7,FZD4,GART,HRK,IFNG,IL13,IL37,IRF4,JA2,KIR2DL4,KLK1,KLRC1,LL                                                                                                                                                                                                                                                                                                                                                             | 12                |                                                                                                                                                                                                                                                 |
| DNA Replication, Recombination, and Repair, Cellular Growth and Proliferation, Embryonic Development                         | ABCC1,ACLS3,AMOTL2,B4GALT1,CAMK4,CCD14,GETN2,CSP4,EEJ,F5,F11,FOXO3,GNB2,GTSE1,HEY2,IL2RA,ITGB1,LIN9,MGAT1,MYBL2,NOTCH4,RAD23B,RNF111,SLC16A1,STAT6B,SVMY1,TACSTD2,TMEM126B,TP53,TTK,UXT,XPC,ZMYM6,ZNF24,ZNF507                                                                                                                                                                                                                                                                                      | 12                |                                                                                                                                                                                                                                                 |
| Cancer, Dermatological Diseases and Conditions, Gastrointestinal Disease                                                     | AIM1,CNN2,CPT1B,CRAT,CTNBB1,DEFAS,DKK3,DPEP1,EDN3,F13A1,GAD1,GPX2,HSD17BH,ILKRC3,IPN81,LDHB,MUC6,NA10,PCCA,PCDH11Y,PCR,PIGC,PIY,PLS3,PPP1R10,PTCH1,PTGDR,PTEN,OPCT,PCN1,SLC26A2,SNAPC1,TCF,TOB2                                                                                                                                                                                                                                                                                                     | 10                |                                                                                                                                                                                                                                                 |
| Cellular Development, Cellular Growth and Proliferation, Gene Expression                                                     | ABH43,ABHD16A,STG2,CND1,CONE2,CDKN1C,Cipr,DDX5,EPNA5,FLJ1F57,GF3CA,HIC1,HIRA,HMG2,INS2,MLF,KRT10,LOC1196751,1et,7,LIN28A,LRRIIP1,MBD3,NCOA1,NRA42,POLD3,PPP1R12B,SERPINE5,Smed3,SMPDL3A,STXBPA1L1,TPG3,UGT1A9 (includes others),ZNF367                                                                                                                                                                                                                                                              | 10                |                                                                                                                                                                                                                                                 |
| Cell Morphology, Cellular Development, Embryonic Development                                                                 | CCL14,CCL17,CNT2,CDH1,CNOT8,DDX5,EAF2,EWSR1,GAB2,GALNT3,GRB2,GF2H1,HAMP,IRS4,MED24,MED26,MEN1,MSX2,NTRK3,PIK3C2B,PLC gamma,POLR2A,PPD2,PUF60,RPL9,RPL18,SFRP4,Shc,SKAP2,STAT5B,SUPT1H,TAFA4,TAFA2,TLK2,ZNF141                                                                                                                                                                                                                                                                                       | 10                |                                                                                                                                                                                                                                                 |
| Lipid Metabolism, Molecular Transport, Small Molecule Biochemistry                                                           | CABIN1,CDKN1B,CHKA,CCL17A1,CTSB,EGFR,EIF5A,ESR1,FAM188A,GPAM,HABP2,HBE1,HIF1A,IL6,IL37,IL11A,IL36G,LCAT,LRSAM1,mir-155-5p (miRNAs wiseec UAUUGCU),mir-218-5p (and other miRNAs wiseec                                                                                                                                                                                                                                                                                                               | 10                |                                                                                                                                                                                                                                                 |
| Infectious Disease, Cell Death and Survival, Molecular Transport                                                             | UGUGCU),MPG,NAE1,NEU1,NR2F2,PK2,PLG,PKRAC2B,S100A10,SERPINF2,SIRT6,STC2,TFEB,TMEM56B,TWF1                                                                                                                                                                                                                                                                                                                                                                                                           | 10                |                                                                                                                                                                                                                                                 |
| Connective Tissue Development and Function, Skeletal and Muscular System Development and Function, Cell Death and Survival   | APL2,APOLB,B4GALNT1,C19orf66,CA12,CD24,CHAC1,CLDN7,CPVL,DDX60,ENTPD1,EYAA4,GLS,GPATC11,HERC6,HNRNP2B1,IFI35,IFIT5,IFITM3,IFNA2,IFNL1,CN1,LCR9,LCNP1,LPR2,MIF,ATP6,M7,CD2,MUC3,OA51,RIMKB,SP110,TDRD7,TMEH140,TRIM14,TRIM31                                                                                                                                                                                                                                                                          | 9                 |                                                                                                                                                                                                                                                 |
| Cell Cycle, Cellular Assembly and Organization, DNA Replication, Recombination, and Repair                                   | ABLIM,ACP2,ADCY7,ARHGFE5,ARPC1A,ATP9A,DUSP9,DYRK3,ERN1,FSH,GNLY,GNRH,HRK,IL1,LOC1891,LPCAT2,MT3,PDGF BB,PDXX,PLCL1,PLN3,POPS,PPF1A4,PIPH,PRKX,PRPF18,PSMC3,PSMD1,PSMD3,PTPRN,RLF3,NFK1,LMBIM6,TOB1,USP14                                                                                                                                                                                                                                                                                            | 9                 |                                                                                                                                                                                                                                                 |
| Inflammatory Response, Cellular Movement, Immune Cell Trafficking                                                            | AKAP12,ALOX5,ATF3,AURKA,BAG5,BCRA1,BRINP3,CCNA2,CN81,CCNE1,CCDC25,CHUK,ERCC6L,EREG,FSCX3,ITGB1,KIF11,KIF23,KIF2C,KIFC1,MBD2,MICAL1,MFTMT,MYO18A,NUPR1,PLK1,PSMB3,RAB29,RAD51,RILF2,SL6,GALNAC6,STIL,STK36,TFAP2A,Y11                                                                                                                                                                                                                                                                                | 9                 |                                                                                                                                                                                                                                                 |
| Cancer, Hematological Disease, Immunological Disease                                                                         | ARHGFE6,B9G,CCLE2A,DRB,CD39DC,CDK11A,CHST2,CHST4,CTSA,DLU1I,ELF1,ELF1,GLB1,GMFB,IL10RA,JAG2,LLR45,MMP8,NCSTN,NPR1,NTSC3,A,OASL,PAK1,PGA5 (includes others),PGM1,PTGS1,RHOJ,S100A8,SDC4,SPTBN5,TGM2,TNF,TNFAIP2                                                                                                                                                                                                                                                                                      | 9                 |                                                                                                                                                                                                                                                 |
| Molecular Transport, RNA Trafficking, Gene Expression                                                                        | 26s Proteasome,Actin,Alpha tubulin,APP1,AR,ARQ2,CELF1,CTBP2,ELAVL1,FN1A,FNTA,B,Gen5,GLRX,GPAA1,GSN,HDAC6,IDE,LMOD1,mediator,PIGK,PIGT,PPID,PSMB1,PSMB5,RUVBL2,SEPT4,TAD2B,TGFB11,TP90,TPP1,TRAP1,TUBB3,TUBB2A,Ubiquitin,WIPF1                                                                                                                                                                                                                                                                       | 9                 |                                                                                                                                                                                                                                                 |
| Cardiovascular System Development and Function, Organismal Development, Developmental Disorder                               | ACACA,ALYREF,BIRC6,BRF1,C17orf85,CASP9,CDKN1A,CHTOP,CLA2,DDX39A,ERH,FHIT,FOXG1,GT2I,MRPS35,MTBP,MYC,NCBP1,NCBP2,PEB4,POLDIP3,P1MS,RNF148,RNF48,SRF,SRRT,TAT,THOC1,THOC2,THOC3,THOC5,THOC6,THOC7,TP1,ZC3H11A                                                                                                                                                                                                                                                                                         | 9                 |                                                                                                                                                                                                                                                 |
| Cell Cycle, Cellular Movement, Cell Morphology                                                                               | ADAR,BCL2L1,B.BKR8,CHAT,CRHR1,DAG1,DEAF1,DNAJC15,Extensin,FYB,GPRI1,HLA-E,IFIT5,IFIT4,IFIT3,IRF5,IRF5,IGL3,SBP,MAPK1,NR3C1,NUDT11,OA53,PDLIM2,PTX2,Pkd(s),POMGN1,PTGER3,PTK2B,SGPL1,SGPP1,SKAP1,SLC22A3,TNFRSF8,T,RMZ3,TRIM38                                                                                                                                                                                                                                                                       | 9                 |                                                                                                                                                                                                                                                 |
| Cancer, Cellular Movement, Cell Morphology                                                                                   | BICD2,CHEK1,COL8A1,DFB4,DLK1,DDX11,DYRK1B,E2F4,E2T2,EXOSC8,HAPLN1,KRAS,LAMP2,MTHFD1,MYC,MYCBP2,NEK8,NOXA1,NOXO1,PKN2,PKP2,PLCE1,POLR3A,POLR3C,POLR3F,PPP1R9,RAC1,RFK,SEMA3A,SSX2IP,TIAM1,TNFRSF10A,VP28,ZH2,ZNF217                                                                                                                                                                                                                                                                                  | 8                 |                                                                                                                                                                                                                                                 |
| DNA Replication, Recombination, and Repair, Cellular Function and Maintenance, Hematological System Development and Function | ABLIM1,ALG6,ALG10,ARAF,SAC11,CBFB,CYP27,DRD3,DSG2,ENG,EWSR1,FGF17,FLNA,GATM,HMOX1,ICK,ITGB3,JUP,LCR,MAP7,MAP3K3,MGEA5,MMP14,NTHL1,PAK1,PLAU,PRKCG,PRDM1,SVL1,TFE3,TGFB1,TGFB2,TTCC2,VIM,YYH4G                                                                                                                                                                                                                                                                                                       | 8                 |                                                                                                                                                                                                                                                 |
| Protein Ubiquitination Pathway                                                                                               | ANPEP,Ap1,BRIP1,CASP8A2,CBLB,CXCR5,FAS,HERC2,LMX1B,MAP2K11,MSH6,NEED4,NKX6-1,NMNAT1,NPH5E,NPTN,NRXN1,OPRM1,PARP1,PCNA,PDGFA,PMS1,POLD1,RAPGEF4,RECQL5,RFC1,RFC2,RFC4,RNF20,SPARC,SRSF4,SRSF6,TGFB1,USP1,WDR48                                                                                                                                                                                                                                                                                       | 8                 |                                                                                                                                                                                                                                                 |
| Canonical Pathways                                                                                                           |                                                                                                                                                                                                                                                                                                                                                                                                                                                                                                     |                   |                                                                                                                                                                                                                                                 |
| Chondroitin Sulfate Biosynthesis                                                                                             | -log(p-value)                                                                                                                                                                                                                                                                                                                                                                                                                                                                                       | Ratio             | Molecules                                                                                                                                                                                                                                       |
| Dermatan Sulfate Biosynthesis (Late Stages)                                                                                  | 4.25<br>4.22E+00                                                                                                                                                                                                                                                                                                                                                                                                                                                                                    | 0.173<br>1.95E-01 | CHST2,B4GALT7,GAL3ST2,HS3ST3B1,CHST4,HS6ST3,CHST12,SULT1B1,SULT2B1<br>CHST2,GAL3ST2,HS3ST3B1,CHST4,HS6ST3,CHST12,SULT1B1,SULT2B1<br>HLA-DOA,HALEP,PK3C2G,CD83,IL37,HLA-DQB1,NFKB2,FCGR2B,TLR9,HLA-DRB1,PLCE1,NGFR,PLCG2,FCER1G,LTBR,PLCL1,IFNA5 |
| Dendritic Cell Maturation                                                                                                    | 4.19E+00                                                                                                                                                                                                                                                                                                                                                                                                                                                                                            | 1.01E-01          | CHST2,B4GALT7,GAL3ST2,HS3ST3B1,CHST4,HS6ST3,CHST12,SULT1B1,SULT2B1                                                                                                                                                                              |
| Dermatan Sulfate Biosynthesis                                                                                                | 4.12E+00                                                                                                                                                                                                                                                                                                                                                                                                                                                                                            | 1.67E-01          | CHST2,B4GALT7,GAL3ST2,HS3ST3B1,CHST4,HS6ST3,CHST12,SULT1B1,SULT2B1                                                                                                                                                                              |
| T Helper Cell Differentiation                                                                                                | 4.09E+00                                                                                                                                                                                                                                                                                                                                                                                                                                                                                            | 1.49E-01          | STAT6,HLA-DOA,HLA-DRB1,TGFB1,NGFR,IL10RB,FCER1G,HLA-DQB1,BCL6,IL4                                                                                                                                                                               |
| Heparan Sulfate Biosynthesis                                                                                                 | 4.05E+00                                                                                                                                                                                                                                                                                                                                                                                                                                                                                            | 1.64E-01          | CHST2,B4GALT7,GAL3ST2,HS3ST3B1,CHST4,HS6ST3,CHST12,SULT1B1,SULT2B1                                                                                                                                                                              |
| Chondroitin Sulfate Biosynthesis (Late Stages)                                                                               | 3.99E+00                                                                                                                                                                                                                                                                                                                                                                                                                                                                                            | 1.82E-01          | CHST2,GAL3ST2,HS3ST3B1,CHST4,HS6ST3,CHST12,SULT1B1,SULT2B1                                                                                                                                                                                      |
| Heparan Sulfate Biosynthesis (Late Stages)                                                                                   | 3.72E+00                                                                                                                                                                                                                                                                                                                                                                                                                                                                                            | 1.67E-01          | CHST2,GAL3ST2,HS3ST3B1,CHST4,HS6ST3,CHST12,SULT1B1,SULT2B1                                                                                                                                                                                      |
| Crosstalk between Dendritic Cells and Natural Killer Cells                                                                   | 3.68E+00                                                                                                                                                                                                                                                                                                                                                                                                                                                                                            | 1.24E-01          | KIR3DL1,HLA-DRB1,ICAM3,CD83,LTBR,NFKB2,TLR9,IFNA5,HLA-E,FASLG,IL4                                                                                                                                                                               |
| Altered T Cell and B Cell Signaling in Rheumatoid Arthritis                                                                  | 3.39E+00                                                                                                                                                                                                                                                                                                                                                                                                                                                                                            | 1.23E-01          | HLA-DOA,HLA-DRB1,TGFB1,FCER1G,HLA-DQB1,NFKB2,IL37,TLR9,FASLG,IL4                                                                                                                                                                                |
| Protein Ubiquitination Pathway                                                                                               | 3.36E+00                                                                                                                                                                                                                                                                                                                                                                                                                                                                                            | 7.87E-02          | PSMB3,NEED4,USP14,PSMB5,PSMD7,MED20,UBC4B,BIRC6,USP1,PSMD3,PSMB8,PSMB6,USP2,6,UCLH1,UBE2D4,PSMB2,BAP1,PSMD1,UBC,PSM3C                                                                                                                           |
| Autoimmune Thyroid Disease Signaling                                                                                         | 3.32E+00                                                                                                                                                                                                                                                                                                                                                                                                                                                                                            | 1.67E-01          | HLA-DOA,HLA-DRB1,FCER1G,HLA-DQB1,HLA-E,FASLG,IL4                                                                                                                                                                                                |
| Graft-versus-Host Disease Signaling                                                                                          | 3.19E+00                                                                                                                                                                                                                                                                                                                                                                                                                                                                                            | 1.59E-01          | HLA-DOA,HLA-DRB1,FCER1G,HLA-DQB1,IL37,HLA-E,FASLG<br>EC5T1,GAL3ST2,CHST4,CPT1B,IL37,CHST12,SULT2B1,CHST2,HS3ST3B1,NR0B2,SCARB1,MGST                                                                                                             |
| LPS/IL-1 Mediated Inhibition of RXR Function                                                                                 | 3.12E+00                                                                                                                                                                                                                                                                                                                                                                                                                                                                                            | 8.17E-02          | 2,NGFR,HS6ST3,CPT1C,ABCC4,SULT1B1                                                                                                                                                                                                               |
| Allograft Rejection Signaling                                                                                                | 2.96E+00                                                                                                                                                                                                                                                                                                                                                                                                                                                                                            | 1.46E-01          | HLA-DOA,HLA-DRB1,FCER1G,HLA-DQB1,HLA-E,FASLG,IL4                                                                                                                                                                                                |
| Antioxidant Action of Vitamin C                                                                                              | 2.88E+00                                                                                                                                                                                                                                                                                                                                                                                                                                                                                            | 1.06E-01          | PLCE1,PLA2G2D,LCAT,CSF2RA,PLCG2,PLA2G1B,NFKB2,STAT5B,PLCL1,GLRX                                                                                                                                                                                 |
| Antigen Presentation Pathway                                                                                                 | 2.85E+00                                                                                                                                                                                                                                                                                                                                                                                                                                                                                            | 1.62E-01          | HLA-DOA,PSMB5,HLA-DRB1,PSMB8,PSMB6,HLA-E                                                                                                                                                                                                        |
| OX40 Signaling Pathway                                                                                                       | 2.65E+00                                                                                                                                                                                                                                                                                                                                                                                                                                                                                            | 1.30E-01          | CD3G,HLA-DOA,HLA-DRB1,FCER1G,HLA-DQB1,NFKB2,HLA-E<br>RPL11,EIF3C,PIK3C2G,RPL23,RPL9,RPL10A,RPL6,PPP1CC,EIF3B,RPL30L,RP53,RPL18,RP2S4,RPSA                                                                                                       |
| EIF2 Signaling                                                                                                               | 2.65E+00                                                                                                                                                                                                                                                                                                                                                                                                                                                                                            | 8.14E-02          | ARHGFE4,PLA2G1B,ARHGFE1,NFKB2,FCGR2B,RAP1A,HDAC6,ARHGFE5,CD3G,PPP1R12B,PLCE1,PLA2G2D,PLCG2,ARHGFE6,NFKB2,FCER1G,LCF2                                                                                                                            |
| Phospholipase C Signaling                                                                                                    | 2.62E+00                                                                                                                                                                                                                                                                                                                                                                                                                                                                                            | 7.36E-02          | CD3G,HLA-DOA,HLA-DRB1,NGFR,PIA51,FCER1G,HLA-DQB1,NFKB2,HLA-E,FASLG                                                                                                                                                                              |
| Type I Diabetes Mellitus Signaling                                                                                           | 2.49E+00                                                                                                                                                                                                                                                                                                                                                                                                                                                                                            | 9.43E-02          | GSR,GLRX                                                                                                                                                                                                                                        |
| Glutathione Redox Reactions II                                                                                               | 2.47E+00                                                                                                                                                                                                                                                                                                                                                                                                                                                                                            | 6.67E-01          | CD3G,HLA-DOA,HLA-DRB1,PLCG2,GN11,FCER1G,GNB2,PIK3C2G,FCER1A,NFKB2,HLA-DQB1,FCGR2B,LCF2                                                                                                                                                          |
| Role of NFAT in Regulation of the Immune Response                                                                            | 2.36E+00                                                                                                                                                                                                                                                                                                                                                                                                                                                                                            | 7.83E-02          | PPP2R2A,DUSP6,PLA2G1B,PIK3C2G,RAPGEF4,RAP1A,KSR1,PPP1CC,PPP1R10,PLA2G2D,PPP1R7,PLCG2,DUSP4,PPP2R5E                                                                                                                                              |
| ERK/MAPK Signaling                                                                                                           | 2.34E+00                                                                                                                                                                                                                                                                                                                                                                                                                                                                                            | 7.53E-02          | R7,PLCG2,DUSP4,PPP2R5E                                                                                                                                                                                                                          |
| Breast Cancer Regulation by Statmin1                                                                                         | 2.26E+00                                                                                                                                                                                                                                                                                                                                                                                                                                                                                            | 1.37E-02          | TP53,TUBB3,ARHGFE4,PPP2R2A,PIK3C2G,ARHGFE1,ARHGFE5,PPP1CC,PPP1R10,PPP1R7,ARHGFE16,GNB2,TUBA1C,PPP2R5E                                                                                                                                           |
| Trans-amination/ Diphosphate Biosynthesis                                                                                    | 2.18E+00                                                                                                                                                                                                                                                                                                                                                                                                                                                                                            | 5.00E-01          | FDP5,IDI1                                                                                                                                                                                                                                       |
| Communication between Innate and Adaptive Immune Cells                                                                       | 2.18E+00                                                                                                                                                                                                                                                                                                                                                                                                                                                                                            | 9.76E-02          | HLA-DRB1,FCER1G,CD83,IL37,TLR9,IFNA5,HLA-E,IL4                                                                                                                                                                                                  |
| Assembly of RNA Polymerase III Complex                                                                                       | 2.17E+00                                                                                                                                                                                                                                                                                                                                                                                                                                                                                            | 2.50E-01          | GTFS3A,SP3A1,BRF1                                                                                                                                                                                                                               |
| Role of Pattern Recognition Receptors in Recognition of Bacteria and Viruses                                                 | 2.14E+00                                                                                                                                                                                                                                                                                                                                                                                                                                                                                            | 8.40E-02          | OAS1,TGFB1,PLCG2,PIK3C2G,C1QC,C1QA,NFKB2,TLR9,IFNA5,IL4                                                                                                                                                                                         |
| Atherosclerosis Signaling                                                                                                    | 2.11E+00                                                                                                                                                                                                                                                                                                                                                                                                                                                                                            | 8.33E-02          | SELE,APOB,PLA2G2D,LCAT,TGFB1,CD36,PLA2G1B,NFKB2,IL37,ALOXE3<br>PPP1CC,APOB,PPP1R10,PPP1R7,PPP2R2A,NGFR,PLCG2,PIK3C2G,ARG2,PPP2R5E,NFKB2,RAP1,IL4                                                                                                |
| Production of Nitric Oxide and Reactive Oxygen Species in Macrophages                                                        | 2.09E+00                                                                                                                                                                                                                                                                                                                                                                                                                                                                                            | 7.26E-02          | C4A/C4B,APOB,LDLR,LCAT,NGFR,CD36,ACACA,ARG2,NFKB2,IL37                                                                                                                                                                                          |
| LXR/RXR Activation                                                                                                           | 2.09E+00                                                                                                                                                                                                                                                                                                                                                                                                                                                                                            | 8.26E-02          | PLCE1,PLA2G2D,LCAT,PLCG2,PLA2G1B,PLCL1                                                                                                                                                                                                          |
| Phospholipase C Signaling                                                                                                    | 2.01E+00                                                                                                                                                                                                                                                                                                                                                                                                                                                                                            | 1.11E-01          | CAPN5,TP53,PLCG2,BIRC6,BCL2L1,NFKB2,BCL2L1,FASLG                                                                                                                                                                                                |
| Apoptosis Signaling                                                                                                          | 2.00E+00                                                                                                                                                                                                                                                                                                                                                                                                                                                                                            | 9.09E-02          | TUBB3,STK36,GN11,PIK3C2G,MMP2,NCK1,RAP1A,HERC2,FZD8,MICAL1,SRGAP3,PLCE1,SEMA4,ARPC1A,FZD4,NTRK3,NGFR,EFNA5,PLCG2,GNB2,TUBA1C,BMP7,PLCL1,PTCH2                                                                                                   |
| Axonal Guidance Signaling                                                                                                    | 1.97E+00                                                                                                                                                                                                                                                                                                                                                                                                                                                                                            | 6.56E-02          | KIR3DL1,KIR2DS4 (includes others),PLCG2,PIK3C2G,FCER1G,KLCA3,NCK1,LCF2,KLRC1                                                                                                                                                                    |
| Natural Killer Cell Signaling                                                                                                | 1.95E+00                                                                                                                                                                                                                                                                                                                                                                                                                                                                                            | 8.33E-02          | ARHGFE5,ARHGFE4,PPP1R7,PLCE1,ARHGFE16,PLCG2,GN11,GNB2,PIK3C2G,GATA6,ARHGFE1,NFKB2,PLCL1                                                                                                                                                         |
| Thrombin Signaling                                                                                                           | 1.94E+00                                                                                                                                                                                                                                                                                                                                                                                                                                                                                            | 6.95E-02          | GPAM,AGPAT2,AGPAT1                                                                                                                                                                                                                              |
| CDP-diacetylglucosyl Biosynthesis I                                                                                          | 1.88E+00                                                                                                                                                                                                                                                                                                                                                                                                                                                                                            | 2.00E-01          |                                                                                                                                                                                                                                                 |

Protein Kinase A Signaling 1.84E+00  
CD28 Signaling in T Helper Cells 1.83E+00  
PKC $\delta$  Signaling in T Lymphocytes 1.83E+00  
Sperm Motility 1.83E+00  
D-myo-inositol-5-phosphate Metabolism 1.77E+00  
Synaptic Long Term Potentiation 1.76E+00  
Tec Kinase Signaling 1.76E+00  
Synaptic Long Term Depression 1.75E+00  
Endothelin-1 Signaling 1.73E+00  
Phosphatidylglycerol Biosynthesis II (Non-plastidic) 1.73E+00  
ICOS/ICOSL Signaling in T Helper Cells 1.62E+00  
IL-15 Signaling 1.61E+00  
Triacylglycerol Biosynthesis 1.61E+00  
Systemic Lupus Erythematosus Signaling 1.59E+00  
Sphingosine and Sphingosine-1-phosphate Metabolism 1.55E+00  
CTLA4 Signaling in Cytotoxic T Lymphocytes 1.55E+00  
Endothelin-1 Signaling 1.55E+00  
Nur77 Signaling in T Lymphocytes 1.54E+00  
TREM1 Signaling 1.53E+00  
Basal Cell Carcinoma Signaling 1.53E+00  
Cdc42 Signaling 1.50E+00  
Fc Epsilon RI Signaling 1.49E+00  
Interferon Signaling 1.48E+00  
Toll-like Receptor Signaling 1.45E+00  
JAK/Stat Signaling 1.45E+00  
Glycogen Degradation II 1.45E+00  
Lymphotxin  $\beta$  Receptor Signaling 1.45E+00  
Cardiac  $\beta$ -adrenergic Signaling 1.44E+00  
Chronic Myeloid Leukemia Signaling 1.43E+00  
IL-4 Signaling 1.43E+00  
Doxamine-DARPP32 Feedback in cAMP Signaling 1.38E+00  
Dolichyl-diphosphooligosaccharide Biosynthesis 1.36E+00  
Calcium-induced T Lymphocyte Apoptosis 1.33E+00  
Dopamine Receptor Signaling 1.33E+00  
Superpathway of Inositol Phosphate Compounds 1.32E+00  
MIF Regulation of Innate Immunity 1.31E+00  
Induction of Apoptosis by HIV1 1.31E+00  
D-myo-inositol (1,4,5,6)-Tetraakisphosphate Biosynthesis 1.30E+00  
D-myo-inositol (3,4,5,6)-Tetraakisphosphate Biosynthesis 1.30E+00  
Glycogen Degradation III 1.29E+00  
Ceramide Signaling 1.26E+00  
Xenobiotic Metabolism Signaling 1.26E+00  
Epithelial Adherens Junction Signaling 1.26E+00  
PPAR $\alpha$ /RXR $\alpha$  Activation 1.26E+00  
Granulocyte Adhesion and Diapedesis 1.26E+00  
Wnt/ $\beta$ -catenin Signaling 1.24E+00  
3-phosphoinositide Biosynthesis 1.21E+00  
IL-15 Production 1.21E+00  
Mitotic Roles of Polo-Like Kinase 1.21E+00  
B Cell Development 1.17E+00  
Hepatic Fibrosis/ Hepatic Stellate Cell Activation 1.15E+00  
Remodeling of Epithelial Adherens Junctions 1.14E+00  
Role of p14/p19ARF in Tumor Suppression 1.13E+00  
CCR5 Signaling in Macrophages 1.11E+00  
Neurotrophin/Trk Signaling 1.11E+00  
IL-10 Signaling 1.09E+00  
AMPK Signaling 1.08E+00  
Cytotoxic T Lymphocyte-mediated Apoptosis of Target Cells 1.06E+00  
3-phosphoinositide Degradation 1.04E+00  
G-Protein Coupled Receptor Signaling 1.03E+00  
Small Cell Lung Cancer Signaling 1.03E+00  
Inhibition of Angiogenesis by TSP1 1.03E+00  
Complement System 1.03E+00  
Role of Cytokines in Mediating Communication between Immune Cells 1.00E+00  
14-3-3-mediated Signaling 1.00E+00  
Signaling by Rho Family GTPases 9.99E-01  
TWEAK Signaling 9.99E-01  
MIF-mediated Glucocorticoid Regulation 9.99E-01  
Superpathway of Geranylgeranylphosphate Biosynthesis I (via Mevalonate) 9.96E-01  
Leptin Signaling in Obesity 9.91E-01  
Molecular Mechanisms of Cancer 9.76E-01  
BMP signaling pathway 9.73E-01  
p70S6K Signaling 9.71E-01  
IL-9 Signaling 9.69E-01  
Regulation of eIF4 and p70S6K Signaling 9.56E-01  
Role of Macrophages, Fibroblasts and Endothelial Cells in Rheumatoid Arthritis 9.51E-01  
Mitochondrial L-carnitine Shuttle Pathway 9.51E-01  
Tight Junction Signaling 9.48E-01  
Role of CHK Proteins in Cell Cycle Checkpoint Control 9.35E-01  
p53 Signaling 9.35E-01  
CDK5 Signaling 9.35E-01  
cAMP-mediated signaling 9.26E-01  
Cytokines and Cell Cycle Regulation 9.19E-01  
NF- $\kappa$ B Signaling 9.13E-01  
Regulation of IL-2 Expression in Activated and Anergic T Lymphocytes 9.01E-01  
HIF1 $\alpha$  Signaling 8.89E-01  
Reelin Signaling in Neurons 8.84E-01  
Thyroid Cancer Signaling 8.37E-01  
Role of JAK1 and JAK3 in  $\beta$  Cytokine Signaling 8.35E-01  
Role of Lipids/Lipid Rafts in the Pathogenesis of Influenza 8.34E-01  
Huntington's Disease Signaling 8.30E-01  
ICoF Signaling 8.19E-01  
Eicosanoid Signaling 8.17E-01  
Ovarian Cancer Signaling 8.13E-01  
IL-12 Signaling and Production in Macrophages 8.01E-01  
GM-CSF Signaling 7.99E-01  
Sphingosine-1-phosphate Signaling 7.93E-01  
Fc $\gamma$ RIIB Signaling in B Lymphocytes 7.91E-01  
Relaxin Signaling 7.90E-01

5.71E-02  
7.96E-02  
7.96E-02  
7.96E-02  
7.96E-02  
7.96E-02  
7.96E-02  
7.05E-02  
7.96E-02  
6.55E-02  
1.76E-01  
7.77E-02  
9.09E-02  
1.21E-01  
6.25E-02  
2.50E-01  
8.05E-02  
6.55E-02  
9.80E-02  
8.70E-02  
8.70E-02  
6.98E-02  
7.34E-02  
9.80E-02  
1.11E-01  
8.33E-02  
8.33E-02  
2.23E-01  
9.26E-02  
6.82E-02  
7.61E-02  
8.22E-02  
6.37E-02  
2.00E-01  
8.62E-02  
7.79E-02  
6.01E-02  
9.76E-02  
8.47E-02  
6.72E-02  
6.72E-02  
1.82E-01  
7.50E-02  
4.47E-02  
6.29E-02  
6.06E-02  
6.06E-02  
6.02E-02  
6.18E-02  
6.11E-01  
7.94E-02  
1.07E-01  
5.61E-02  
7.58E-02  
1.03E-01  
7.46E-02  
7.46E-02  
6.10E-02  
6.02E-02  
9.68E-02  
9.88E-02  
5.12E-02  
7.04E-02  
9.38E-02  
9.38E-02  
7.69E-02  
6.03E-02  
5.15E-02  
9.09E-02  
9.09E-02  
1.25E-01  
6.85E-02  
4.74E-02  
6.76E-02  
5.93E-02  
8.82E-02  
5.63E-02  
4.88E-02  
1.18E-01  
5.42E-02  
7.27E-02  
6.12E-02  
6.12E-02  
5.09E-02  
6.49E-02  
5.33E-02  
6.41E-02  
5.94E-02  
6.33E-02  
7.69E-02  
6.67E-02  
1.00E-01  
4.87E-02  
5.65E-02  
5.65E-02  
5.38E-02  
5.34E-02  
6.45E-02  
6.33E-02  
7.32E-02  
5.30E-02  
DUSP6,NFKB2,RAP1A,DUSP21,DHH,CDKN3,PPP1CC,DUSP3,PLCE1,RHO,PPP1R10,TGFB1,PPP1R7,NGFR,PLCG2,PDE1B,GNB2,DUSP4,PLCL1,PTCH2,AKAP1  
CD3G,HLA-DOA,HLA-DRB1,PIK3C2G,FCER1G,HLA-DQB1,NFKB2,LCP2  
CD3G,HLA-DOA,HLA-DRB1,PLCG2,PIK3C2G,FCER1G,HLA-DQB1,NFKB2,LCP2  
PLCE1,TPW1,PLA2G2D,LCAT,PLCG2,NPR1,PDE1B,PLA2G1B,PLCL1  
PPAPDC3,PPP1CC,PLCE1,NUDT11,PPP1R7,PPP1R1A,PPP1R8,PLCG2,PPP2R5E,EY4A  
PPP1CC,PLCE1,PPP1R10,PPP1R7,PPP1R1A,PLCG2,GNAA11,PLCL1,RAP1A  
STAT6,PLCG2,GNAA11,GNB2,FCER1A,PIK3C2G,FCER1G,NFKB2,STAT5B,TFNRSF10A,FASLG  
PLCE1,PLA2G2D,LCAT,PPP2R2A,PLCG2,NPR1,GNAA11,PLA2G1B,PPP2R5E,PLCL1  
CSR,MGST2,GPX4  
GPAM,AGPAT2,AGPAT1  
CD3G,HLA-DOA,HLA-DRB1,PIK3C2G,FCER1G,HLA-DQB1,NFKB2,LCP2  
STAT6,PIK3C2G,NFKB2,STAT5B,FASLG,IL4  
GPAM,AGPAT2,LPPR2,AGPAT1  
PRPF19,PIK3C2G,IL37,FCGR2B,TLR9,CD3G,PRPF18,PLCG2,FCER1G,SNRPD1,IFNA5,LSM4,HLA-E  
SDGPP1,ASAH2  
CD3G,PPP2R2A,CLTA,PIK3C2G,FCER1G,PPP2R5E,LCP2  
PLCG2,PLCG2,LCAT,EDN1,PLCG2,GNAA11,PLA2G1B,PIK3C2G,EDNRA,PLCL1,CASP14  
CD3G,HLA-DOA,HLA-DRB1,FCER1G,HLA-DQB1  
PLCG2,CD83,NFKB2,FCGR2B,STAT5B,TLR9  
TP53,FZD8,STK36,FZD4,BMP7,PTCH2  
CD3G,HLA-DOA,ARPC1A,HLA-DRB1,PPP1R12B,FCER1G,HLA-DQB1,IQGAP1,HLA-E  
PLA2G2D,PLCG2,PLA2G1B,FCER1A,PIK3C2G,FCER1G,LC2,IL4  
OAS1,PIAS1,PSMB8,IFNA5  
ECSIT,NFKB2,IL37,UBC,TLR9,TRAF1  
STAT6,PIAS1,PIK3C2G,NFKB2,STAT5B,CCKBR  
PGM1,AGL  
PIK3C2G,CXCL1,LTBR,NFKB2,TRAF1  
PPP1CC,PPP1R10,PPP1R7,PPP1R1A,PPP2R2A,PDE1B,GNB2,PPP2R5E,AKAP1  
HDAC6,TP53,TGFB1,CTBP2,PIK3C2G,NFKB2,STAT5B  
STAT6,HLA-DOA,HLA-DRB1,PIK3C2G,HLA-DQB1,IL4  
PPP1CC,PLCE1,PPP1R10,PPP1R7,PPP2R2A,PLCG2,KCNJ11,PPP2R5E,DRD3,PLCL1  
ALG3,ALG6  
CD3G,HLA-DOA,HLA-DRB1,FCER1G,HLA-DQB1  
PPP1CC,PPP1R10,PPP1R7,PPP2R2A,PPP2R5E,DRD3  
PPAPDC3,PPP1CC,PLCE1,NUDT11,PPP1R7,PPP1R1A,PPP1R8,PLCG2,PIK3C2G,PPP2R5E,EY4A  
TP53,PLA2G2D,PLA2G1B,NFKB2  
TP53,NGFR,NFKB2,FASLG,TRAF1  
PPAPDC3,PPP1CC,NUDT11,PPP1R7,PPP1R1A,PPP1R8,PPP2R5E,EY4A  
PPAPDC3,PPP1CC,NUDT11,PPP1R7,PPP1R1A,PPP1R8,PPP2R5E,EY4A  
PGM1,AGL  
PPP2R2A,NGFR,PIK3C2G,NFKB2,PPP2R5E,KSR1  
GALST2,CHST4,PPP2R2A,PIK3C2G,CHST12,NFKB2,SULT2B1,CHST2,HS3ST3B1,MGST2,HS6S  
T3,PPP2R5E,UCT1A9 (includes others),SULT1B1  
NOTCH4,TUBB3,AGGF1,ARPC1A,ACTN3,SSX2IP,TUBA1C,IQGAP1,RAP1A  
PLCE1,NR0B2,TGFB1,PLCG2,CPT1B,CD36,GNAA11,NFKB2,STAT5B,PLCL1  
SELE,CCL27,NGFR,THY1,CCL24,CCL14,MMP2,CXCL1,IL37,CXCL2  
TP53,FZD8,FZD4,DKK3,PPP2R2A,TGFB1,TLE1,RUVBL2,PPP2R5E,UBC  
PPAPDC3,PPP1CC,NUDT11,PPP1R7,PPP1R1A,PPP1R8,PIK3C2G,PPP2R5E,EY4A  
TWIF1,NFKB2,IFNA5  
ESPL1,PPP2R2A,TGFB1,FBXO5,PPP2R5E  
HLA-DOA,HLA-DRB1,HLA-DQB1  
LEP,EDN1,TGFB1,NGFR,TFNRSF8,COL8A1,EDNRA,MMP2,NFKB2,FASLG,IL4  
TUBB3,ARPC1A,ACTN3,TUBA1C,IQGAP1  
TP53,PIK3C2G,SF3A1  
CD3G,PLCG2,GNB2,FCER1G,FASLG  
SPRY1,NTRK3,NGFR,SPRY2,PIK3C2G  
IL10RB,ARCG2,NFKB2,IL37,FCGR2B  
LEP,PPP2R2A,CPT1B,PIK3C2G,ACACA,CPT1C,PPP2R5E,AK2  
CD3G,FCER1G,FASLG  
PPAPDC3,PPP1CC,NUDT11,PPP1R7,PPP1R1A,PPP1R8,PPP2R5E,EY4A  
APLN,NR,VIPR1,PTGER3,DUSP6,PDE1B,GNAA11,PIK3C2G,DUSP4,RAPGEF4,NFKB2,DRD3,RAP1A,JA  
GTR2  
TP53,FHIT,PIK3C2G,NFKB2,TRAF1  
TP53,TGFB1,CD36  
CAIAC4B,C10C,C10A  
TGFB1,IL37,IFNA5,IL4  
TUBB3,PLCE1,TP73,PLCG2,PIK3C2G,TUBA1C,PLCL1  
ARHGEF5,ARHGEF4,NEED4,ARPC1A,PPP1R12B,ARHGEF16,GNAA11,GNB2,PIK3C2G,ARHGEF1,N  
FKB2,IQGAP1  
NFKB2,BAG4,TRAF1  
PLA2G2D,PLA2G1B,NFKB2  
FDP5,IDI1  
LEP,PLCE1,PLCG2,PIK3C2G,PLCL1  
TP53,ARHGEF4,STK36,GNAA11,PIK3C2G,ARHGEF1,NFKB2,RAP1A,DHH,FZD8,ARHGEF5,FZD4,TG  
FB1,ARHGEF16,BMP7,PTCH2,FASLG  
FST,GREM1,BMP7,NFKB2,PIT2  
PLCE1,PPP2R2A,PLCG2,PIK3C2G,PPP2R5E,PLCL1,IL4  
PIK3C2G,NFKB2,STAT5B  
EIF3C,EIF3B,PPP2R2A,PIK3C2G,PPP2R5E,RP53,RPSA,RPS24  
SELE,PIK3C2G,IL37,TLR9,FZD8,PLCE1,FZD4,DKK3,TGFB1,PLCG2,NGFR,LTBR,PLCL1,TRAF1  
OPT1B,CPT1C  
TP53,PPP2R2A,TGFB1,HSF1,NGFR,VAMP3,NFKB2,PPP2R5E,NAPA  
TP53,PPP2R2A,TLK2,PPP2R5E  
TP53,TP73,PIAS1,PIK3C2G,TFNRSF10A,TP533  
PPP1CC,PPP1R10,PPP1R7,PPP2R2A,NGFR,PPP2R5E  
5.09E-02  
6.49E-02  
5.33E-02  
6.41E-02  
5.94E-02  
6.33E-02  
7.69E-02  
6.67E-02  
1.00E-01  
4.87E-02  
5.65E-02  
5.65E-02  
5.38E-02  
5.34E-02  
6.45E-02  
6.33E-02  
7.32E-02  
5.30E-02  
HDAC6,TP53,CLTA,GNAA11,GNB2,VAMP3,PIK3C2G,UBC,NAPA,CASP14  
TP53,PLCG2,NGFR,PIK3C2G,NFKB2,RAP1A  
PLA2G2D,LCAT,PTGER3,PLA2G1B  
TP53,FZD8,FZD4,EDN1,PIK3C2G,EDNRA,MMP2  
STAT6,AP0B,TGFB1,PIK3C2G,NFKB2,IFNA5,IL4  
CSF2RA,PIK3C2G,STAT5B,BCL2A1  
PLCE1,PLCG2,PIK3C2G,PLCL1,CASP14,ASAH2  
PLCG2,PIK3C2G,FCGR2B  
NPR1,GNAA11,PDE1B,GNB2,PIK3C2G,NFKB2,RAP1A

|                                                                              |          |          |                                                              |
|------------------------------------------------------------------------------|----------|----------|--------------------------------------------------------------|
| Cell Cycle: G1/S Checkpoint Regulation                                       | 7.81E-01 | 6.35E-02 | HDAC6,RPL11,TP53,TGFBI                                       |
| Hypoxia Signaling in the Cardiovascular System                               | 7.81E-01 | 6.35E-02 | UBE2D,TP53,EDN1,BIRC6                                        |
| Role of NANOG in Mammalian Embryonic Stem Cell Pluripotency                  | 7.80E-02 | 7.80E-02 | TP53,FZD8,FZD4,PIK3C2G,GATA6,BMP7                            |
| mTOR Signaling                                                               | 7.77E-01 | 4.95E-02 | EIF3C,EIF3B,PPP2R2A,PIK3C2G,PPP2R5E,RICTOR,RPS3,RPSA,RPS24   |
| UVA-Induced MAPK Signaling                                                   | 7.61E-01 | 5.75E-02 | TP53,PLCE1,PLCG2,PIK3C2G,PLCL1                               |
| Any Hydrocarbon Receptor Signaling                                           | 7.55E-01 | 5.19E-02 | TP53,MGST2,NR0B2,TP73,TGFB1,NFKB2,FASLG                      |
| Angiopoietin Signaling                                                       | 7.47E-01 | 6.15E-02 | PIK3C2G,NCK1,NFKB2,STAT5B                                    |
| CCR3 Signaling in Eosinophils                                                | 7.30E-01 | 5.31E-02 | PPP1R12B,PLA2G2D,PLA2G1B,GNB2,PIK3C2G,CCL24                  |
| Hematopoiesis from Pluripotent Stem Cells                                    | 7.28E-01 | 6.82E-02 | CD3G,FCER1G,IL4                                              |
| PPAR Signaling                                                               | 7.19E-01 | 5.56E-02 | NR0B2,NGFR,NFKB2,IL37,STAT5B                                 |
| Erythropoietin Signaling                                                     | 7.15E-01 | 5.97E-02 | PLCG2,PIK3C2G,NFKB2,STAT5B                                   |
| IL-22 Signaling                                                              | 7.09E-01 | 8.33E-02 | IL10RB,STAT5B                                                |
| Tumoricidal Function of Hepatic Natural Killer Cells                         | 7.09E-01 | 8.33E-02 | M6PR,FASLG                                                   |
| Role of JAK1, JAK2 and TYK2 in Interferon Signaling                          | 7.09E-01 | 8.33E-02 | NFKB2,IFNA5                                                  |
| Role of Oct4 in Mammalian Embryonic Stem Cell Pluripotency                   | 7.08E-01 | 6.67E-02 | TP53,PPP1R8,NR2F2                                            |
| Chemokine Signaling                                                          | 7.00E-01 | 5.89E-02 | PPP1R12B,PLCG2,PIK3C2G,CCL24                                 |
| Renal Cell Carcinoma Signaling                                               | 6.85E-01 | 5.80E-02 | TGFB1,PIK3C2G,UBC,RAP1A                                      |
| p38 MAPK Signaling                                                           | 6.84E-01 | 5.13E-02 | TP53,PLA2G2D,TGFB1,PLA2G1B,IL37,FASLG                        |
| Pyrimidine Ribonucleotides Interconversion                                   | 6.82E-01 | 8.00E-02 | ENTPD1,ENTPD2                                                |
| Fcγ Receptor-mediated Phagocytosis in Macrophages and Monocytes              | 6.80E-01 | 5.38E-02 | ARPC1A,VAMP3,PIK3C2G,NCK1,LCP2                               |
| HMG21 Signaling                                                              | 6.73E-01 | 5.08E-02 | SELE,TGFB1,NGFR,PIK3C2G,NFKB2,IL4                            |
| P2Y Purigenic Receptor Signaling Pathway                                     | 6.73E-01 | 5.08E-02 | PLCE1,PLCG2,GNB2,PIK3C2G,NFKB2,PLCL1                         |
| Antiproliferative Role of TOG in T Cell Signaling                            | 6.57E-01 | 7.69E-02 | TGFB1,TOG1                                                   |
| Thyroid Hormone Metabolism II (via Conjugation and/or Degradation)           | 6.57E-01 | 7.69E-02 | SULT1B1,UGT1A9 (includes others)                             |
| D-erythro-inositol (1,4,5)-trisphosphate Biosynthesis                        | 6.56E-01 | 7.69E-02 | PLCE1,PLCG2                                                  |
| PDFR Signaling                                                               | 6.56E-01 | 5.63E-02 | TP53,PIK3C2G,NFKB2,FASLG                                     |
| Ephrin A Signaling                                                           | 6.53E-01 | 6.25E-02 | EFNA5,NGFR,PIK3C2G                                           |
| Glioblastoma Multiforme Signaling                                            | 6.51E-01 | 4.83E-02 | TP53,FZD8,PLCE1,FZD4,PLCG2,PIK3C2G,PLCL1                     |
| Glia Signaling                                                               | 6.51E-01 | 5.00E-02 | APLN,NR,PTGER3,GNB2,DRD3,RAP1A,AGTR2                         |
| Talimasepa Signaling                                                         | 6.44E-01 | 5.21E-02 | HDAC6,TP53,PPP2R2A,PIK3C2G,PPP2R5E                           |
| RhoGDI Signaling                                                             | 6.37E-01 | 4.65E-02 | ARHGEF5,ARHGEF4,ARPC1A,PPP1R12B,ARHGEP16,GNAA11,GNB2,ARHGEF1 |
| Cell Cycle Control of Chromosomal Replication                                | 6.33E-01 | 7.41E-02 | MCM3,MCM6                                                    |
| Pyrimidine Ribonucleotides De Novo Biosynthesis                              | 6.33E-01 | 7.41E-02 | ENTPD1,ENTPD2                                                |
| Superpathway of Cholesterol Biosynthesis                                     | 6.33E-01 | 7.41E-02 | FDPS,IDI1                                                    |
| PI3K Signaling in B Lymphocytes                                              | 6.20E-01 | 4.88E-02 | PLCE1,PLCG2,NFKB2,FCGR2B,PLCL1,IL4                           |
| Agranulocyte Adhesion and Diapedesis                                         | 6.12E-01 | 4.57E-02 | SELE,CCL27,CCL24,CCL14,MMP2,CXCL1,IL37,CXCL2                 |
| Cellular Effects of Sildenafil (Viagra)                                      | 6.10E-01 | 4.84E-02 | PLCE1,PPP1R12B,SLC4A11,PLCG2,PDE1B,PLCL1                     |
| TNFR2 Signaling                                                              | 6.10E-01 | 7.14E-02 | NFKB2,TRAF1                                                  |
| FXR/RXR Activation                                                           | 6.00E-01 | 4.80E-02 | C4A/C4B,APOB,SCARB1,LCAT,NR0B2,IL37                          |
| Gap Junction Signaling                                                       | 5.96E-01 | 4.64E-02 | TUBB3,PLCE1,PLCG2,NPR1,PIK3C2G,TUBA1C,PLCL1                  |
| Acute Myeloid Leukemia Signaling                                             | 5.89E-01 | 5.26E-02 | CSF2RA,PIK3C2G,NFKB2,STAT5B                                  |
| VEGF Family Ligand-Receptor Interactions                                     | 5.89E-01 | 5.26E-02 | PLA2G2C,PLCG2,PLA2G1B,PIK3C2G                                |
| Conic Hedgehog Signaling                                                     | 5.88E-01 | 6.90E-02 | STK36,PTCH2                                                  |
| Colorectal Cancer Metastasis Signaling                                       | 5.84E-01 | 4.69E-02 | TP53,FZD8,FZD4,TGFB1,PTGER3,GNB2,PIK3C2G,MMP2,NFKB2,TLR9     |
| Insulin Receptor Signaling                                                   | 5.71E-01 | 4.69E-02 | PPP1C8,PPP1R10,PPP1R7,PIK3C2G,STXB4,NCK1                     |
| Role of IL-17A in Arthritis                                                  | 5.57E-01 | 5.56E-02 | PIK3C2G,CXCL1,NFKB2                                          |
| Regulation of the Epithelial-Mesenchymal Transition Pathway                  | 5.56E-01 | 4.40E-02 | FGF17,FZD8,NOTCH4,FZD4,TGFB1,PIK3C2G,MMP2,NFKB2              |
| Sperm Cell-Seminal Cell Junction Signaling                                   | 5.53E-01 | 4.40E-02 | TUBB3,AGGF1,TGFB1,ACTN3,PIK3C2G,TUBA1C,IQGAP1                |
| 4-1BB Signaling in T Lymphocytes                                             | 5.47E-01 | 6.45E-02 | NFKB2,TRAF1                                                  |
| G Protein Signaling Mediated by Tubby                                        | 5.47E-01 | 6.45E-02 | PLCG2,GNB2                                                   |
| Human Embryonic Stem Cell Pluripotency                                       | 5.44E-01 | 4.58E-02 | FZD8,FZD4,TGFB1,NTRK3,PIK3C2G,BMP7                           |
| Thrombopoietin Signaling                                                     | 5.43E-01 | 5.45E-02 | PLCG2,PIK3C2G,STAT5B                                         |
| Clastrin-mediated Endocytosis Signaling                                      | 5.41E-01 | 4.95E-02 | FGF17,AP0B,LDLR,ARPC1A,CLTA,PIK3C2G,STAM,UBC                 |
| Actin Nucleation by ARP-WASP Complex                                         | 5.29E-01 | 5.38E-02 | ARPC1A,PPP1R12B,NCK1                                         |
| ErbB2-ErbB3 Signaling                                                        | 5.29E-01 | 5.38E-02 | PIK3C2G,NRG4,STAT5B                                          |
| Role of Tissue Factor in Cancer                                              | 5.25E-01 | 4.67E-02 | TP53,GNAA11,PIK3C2G,CXCL1,STAT5B                             |
| Diler of Osteoblasts, Osteoclasts and Chondrocytes in Rheumatoid Arthritis   | 5.18E-01 | 4.21E-02 | FZD8,FZD4,DKK3,TGFB1,NGFR,PIK3C2G,BMP7,IL37,IL4              |
| Corticotropin Releasing Hormone Signaling                                    | 5.16E-01 | 4.63E-02 | PLCG2,NPR1,RAP1A,PTCH2,FASLG                                 |
| Myc Mediated Apoptosis Signaling                                             | 5.02E-01 | 5.17E-02 | TP53,PIK3C2G,FASLG                                           |
| ErbB4 Signaling                                                              | 5.02E-01 | 5.17E-02 | PLCG2,PIK3C2G,NRG4                                           |
| ATM Signaling                                                                | 4.89E-01 | 5.08E-02 | TP53,TP73,TLK2                                               |
| TRXR/RXR Activation                                                          | 4.86E-01 | 4.71E-02 | LDLR,SCARB1,PIK3C2G,ACACA                                    |
| ErbB Signaling                                                               | 4.86E-01 | 4.71E-02 | PLCG2,PIK3C2G,NRG4,NCK1                                      |
| Leukocyte Extravasation Signaling                                            | 4.77E-01 | 4.15E-02 | ICAM3,PLCG2,ACTN3,PIK3C2G,THY1,MMP2,RAPGEF4,RAP1A            |
| Activation of IRF by Cytosolic Pattern Recognition Receptors                 | 4.77E-01 | 5.00E-02 | NFKB2,ADAR,IFNA5                                             |
| Antiproliferative Role of Somatostatin Receptor 2                            | 4.77E-01 | 5.00E-02 | NPR1,GNB2,PIK3C2G                                            |
| Cell Cycle Regulation by BTG Family Proteins                                 | 4.76E-01 | 5.71E-02 | PPP2R2A,PPP2R5E                                              |
| tRNA Splicing                                                                | 4.76E-01 | 5.71E-02 | PDE1B,TRPT1                                                  |
| TGF-β Signaling                                                              | 4.66E-01 | 4.60E-02 | RNF111,TGFB1,BMP7,PITX2                                      |
| Role of PI3K/AKT Signaling in the Pathogenesis of Influenza                  | 4.65E-01 | 4.92E-02 | PIK3C2G,NFKB2,IFNA5                                          |
| Integrin Signaling                                                           | 4.64E-01 | 4.10E-02 | CAPN5,ARPC1A,PPP1R12B,PLCG2,ACTN3,PIK3C2G,NCK1,RAP1A         |
| Estrogen-Dependent Breast Cancer Signaling                                   | 4.53E-01 | 4.84E-02 | PIK3C2G,NFKB2,STAT5B                                         |
| Factors Promoting Cardiogenesis in Vertebrates                               | 4.47E-01 | 4.49E-02 | FZD8,FZD4,TGFB1,BMP7                                         |
| Notch Signaling                                                              | 4.45E-01 | 5.41E-02 | NOTCH4,HEY2                                                  |
| B Cell Receptor Signaling                                                    | 4.42E-01 | 4.09E-02 | PLCG2,PIK3C2G,NFKB2,FCGR2B,BCL6,BCL2A1,RAP1A                 |
| Ephrin Receptor Signaling                                                    | 4.35E-01 | 4.07E-02 | ARPC1A,EFNA5,GNAA11,GNB2,PIK3C2G,NCK1,RAP1A                  |
| CD40 Signaling                                                               | 4.31E-01 | 4.69E-02 | PIK3C2G,NFKB2,TRAF1                                          |
| IL-17A Signaling in Airway Cells                                             | 4.31E-01 | 4.69E-02 | PIK3C2G,CXCL1,NFKB2                                          |
| Apoptin Mediated Signaling                                                   | 4.30E-01 | 5.26E-02 | NFKB2,TRAF1                                                  |
| IL-1 Signaling                                                               | 4.28E-01 | 4.28E-02 | ECSIT,GNAA11,GNB2,NFKB2                                      |
| Glucocorticoid Receptor Signaling                                            | 4.20E-01 | 3.88E-02 | CD3G,SELE,TAF1,VIPR1,TGFB1,PIK3C2G,TAT,STAT5B,TSXC22D3,IL4   |
| Non-Small Cell Lung Cancer Signaling                                         | 4.20E-01 | 4.62E-02 | TP53,FHIT,PIK3C2G                                            |
| Docosahexaenoic Acid (DHA) Signaling                                         | 4.16E-01 | 5.13E-02 | PIK3C2G,BCL2A1                                               |
| SAPK/JNK Signaling                                                           | 4.11E-01 | 4.30E-02 | TP53,PIK3C2G,FCER1G,DUSP4                                    |
| Role of MAPK Signaling in the Pathogenesis of Influenza                      | 4.10E-01 | 4.10E-02 | PLA2G2D,LCAT,PLA2G1B                                         |
| Role of NFAT in Cardiac Hypertrophy                                          | 4.10E-01 | 3.98E-02 | HDAC6,PLCE1,TGFB1,PLCG2,GNB2,PIK3C2G,PLCL1                   |
| NRF2-mediated Oxidative Stress Response                                      | 4.03E-01 | 3.95E-02 | GSR,USP14,SCARB1,MGST2,PIK3C2G,ABCC4,BACH1                   |
| Role of PKR in Interferon Induction and Antiviral Response                   | 4.03E-01 | 5.00E-02 | TP53,NFKB2                                                   |
| B Cell Activating Factor Signaling                                           | 4.03E-01 | 4.03E-02 | NFKB2,TRAF1                                                  |
| Transcriptional Regulatory Network in Embryonic Stem Cells                   | 4.03E-01 | 5.00E-02 | GATA6,SMARCD1                                                |
| Mouse Embryonic Stem Cell Pluripotency                                       | 4.02E-01 | 4.26E-02 | TP53,FZD8,FZD4,PIK3C2G                                       |
| Melatonin Signaling                                                          | 3.90E-01 | 4.41E-02 | PLCE1,PLCG2,PLCL1                                            |
| GDNF Family Ligand-Receptor Interactions                                     | 3.90E-01 | 4.41E-02 | PLCG2,PIK3C2G,NCK1                                           |
| Macropinocytosis Signaling                                                   | 3.90E-01 | 4.41E-02 | NRF2,PLCG2,PIK3C2G                                           |
| Role of RIG-I-like Receptors in Antiviral Innate Immunity                    | 3.90E-01 | 4.88E-02 | NFKB2,IFNA5                                                  |
| Mechanisms of Viral Exit from Host Cells                                     | 3.90E-01 | 4.88E-02 | NEDD4,VPS28                                                  |
| Role of Hypercytokinemia/hyperchemokinaemia in the Pathogenesis of Influenza | 3.90E-01 | 4.88E-02 | IL37,IFNA5                                                   |
| Role of IL-17F in Allergic Inflammatory Airway Diseases                      | 3.85E-01 | 3.90E-02 | CXCL1,NFKB2                                                  |
| T Cell Receptor Signaling                                                    | 3.85E-01 | 4.17E-02 | CD3G,PIK3C2G,NFKB2,LCP2                                      |
| Growth Hormone Signaling                                                     | 3.80E-01 | 4.35E-02 | PLCG2,PIK3C2G,STAT5B                                         |
| Melanoma Signaling                                                           | 3.77E-01 | 4.76E-02 | TP53,PIK3C2G                                                 |
| Actin Cytoskeleton Signaling                                                 | 3.76E-01 | 3.81E-02 | FGF17,ARHGEF4,ARPC1A,PPP1R12B,ACTN3,PIK3C2G,ARHGEF1,IQGAP1   |
| Estrogen Receptor Signaling                                                  | 3.64E-01 | 4.04E-02 | TAF1,MED12,NR0B2,TRRAP,CTBP2                                 |
| Neuropathic Pain Signaling In Dorsal Horn Neurons                            | 3.62E-01 | 3.04E-02 | PLCE1,PLCG2,PIK3C2G,PLCL1                                    |
| IL-3 Signaling                                                               | 3.62E-01 | 4.23E-02 | STAT6,PIK3C2G,STAT5B                                         |
| FLT3 Signaling in Hematopoietic Progenitor Cells                             | 3.62E-01 | 4.23E-02 | STAT6,PIK3C2G,STAT5B                                         |
| Hepatic Cholestasis                                                          | 3.48E-01 | 3.80E-02 | NR0B2,TGFB1,NGFR,NFKB2,IL37,IL4                              |

|                                                                      |          |
|----------------------------------------------------------------------|----------|
| Prolactin Signaling                                                  | 3.44E-01 |
| Role of Wnt/GSK-3 $\beta$ Signaling in the Pathogenesis of Influenza | 3.44E-01 |
| Rac Signaling                                                        | 3.33E-01 |
| nNOS Signaling in Neurons                                            | 3.32E-01 |
| Melatonin Degradation I                                              | 3.21E-01 |
| HER-2 Signaling in Breast Cancer                                     | 3.19E-01 |
| Pancreatic Adenocarcinoma Signaling                                  | 3.13E-01 |
| MLP Signaling in Neutrophils                                         | 3.06E-01 |
| Renin-Angiotensin Signaling                                          | 3.00E-01 |
| Glucagon Signaling                                                   | 3.00E-01 |
| Prostate Cancer Signaling                                            | 2.89E-01 |
| CREB Signaling in Neurons                                            | 2.89E-01 |
| Hereditary Breast Cancer Signaling                                   | 2.76E-01 |
| Endometrial Cancer Signaling                                         | 2.75E-01 |
| Serotonin Degradation                                                | 2.75E-01 |
| Superpathway of Melatonin Degradation                                | 2.75E-01 |
| UVB-Induced MAPK Signaling                                           | 2.67E-01 |
| IL-2 Signaling                                                       | 2.67E-01 |
| Sertoli Cell-Sertoli Cell Junction Signaling                         | 2.66E-01 |
| Type II Diabetes Mellitus Signaling                                  | 2.64E-01 |
| Gli3 Signaling                                                       | 2.60E-01 |
| IL-6 Signaling                                                       | 2.53E-01 |
| Regulation of Cellular Mechanics by Calpain Protease                 | 2.51E-01 |
| Neuregulin Signaling                                                 | 2.50E-01 |
| Bladder Cancer Signaling                                             | 2.50E-01 |
| FAK Signaling                                                        | 2.50E-01 |
| G Beta Gamma Signaling                                               | 2.38E-01 |
| Glioma Invasiveness Signaling                                        | 2.36E-01 |

**Upstream Regulators**

| Upstream Regulator                           | Molecule Type           |
|----------------------------------------------|-------------------------|
| BIRC5                                        | other                   |
| SREBF1                                       | transcription regulator |
| IFNG                                         | cytokine                |
| TNF                                          | cytokine                |
| miR-24                                       | microRNA                |
| miR-29b-3p (and other miRNAs w/seed AGCAACA) | mature microRNA         |
| ELF1                                         | transcription regulator |
| Igm                                          | complex                 |
| TFAP2A                                       | transcription regulator |
| NPPB                                         | other                   |
| TREM1                                        | transmembrane receptor  |
| Cg                                           | complex                 |
| TP53                                         | transcription regulator |
| SMC3                                         | other                   |
| MTTP                                         | transporter             |
| CD40                                         | transmembrane receptor  |
| IgG                                          | complex                 |
| ELAVL1                                       | other                   |
| GATA6                                        | transcription regulator |
| PROC                                         | peptidase               |
| IL17F                                        | cytokine                |
| TGM2                                         | enzyme                  |
| IL1B                                         | cytokine                |
| HNRNP2B1                                     | other                   |
| HNF1A                                        | transcription regulator |
| E2F1                                         | transcription regulator |
| ITGAV                                        | ion channel             |
| MBD3                                         | other                   |
| JAG2                                         | growth factor           |
| GAPDH                                        | enzyme                  |
| L1CAM                                        | other                   |
| F10                                          | peptidase               |
| Jnk                                          | group                   |
| SLC5A8                                       | transporter             |
| PCM1                                         | other                   |
| miR-542-3p (miRNAs w/seed GUGACAG)           | mature microRNA         |
| HEY1                                         | transcription regulator |
| FSH                                          | complex                 |
| IL17A                                        | cytokine                |
| RNA polymerase II                            | complex                 |
| ADCY                                         | group                   |
| HEXIM1                                       | transcription regulator |
| NOTCH2                                       | transcription regulator |
| SCUBE3                                       | other                   |
| STAU1                                        | transporter             |
| ZAP70                                        | kinase                  |
| IL33                                         | cytokine                |
| LDL                                          | complex                 |
| HMG81                                        | other                   |
| LIPG                                         | enzyme                  |
| SREBF2                                       | transcription regulator |
| KRAS                                         | enzyme                  |
| E2F3                                         | transcription regulator |
| SP1                                          | transcription regulator |
| LPL                                          | enzyme                  |
| SPINT2                                       | other                   |
| CD40LG                                       | cytokine                |
| RBL1                                         | transcription regulator |
| RELA                                         | transcription regulator |
| IL3                                          | cytokine                |
| S100A6                                       | transporter             |
| E2F4                                         | transcription regulator |

**Bio Functions**

|            |                                  |
|------------|----------------------------------|
| Categories | Diseases or Functions Annotation |
|------------|----------------------------------|

|          |                                     |
|----------|-------------------------------------|
| 4.11E-02 | PLCG2,PIK3C2G,STAT5B                |
| 4.11E-02 | FZD8,FZD4,IFNA5                     |
| 3.88E-02 | ARPC1A,PIK3C2G,NFKB2,IQGAP1         |
| 4.38E-02 | CAPN5,DLG2                          |
| 4.26E-02 | SULT1B1,UGT1A9 (includes others)    |
| 3.95E-02 | TP53,PIK3C2G,MMP2                   |
| 3.77E-02 | TP53,TGFB1,PIK3C2G,NFKB2            |
| 3.74E-02 | ARPC1A,GNB2,PIK3C2G,NFKB2           |
| 3.70E-02 | PLCG2,PIK3C2G,NFKB2,AGTR2           |
| 3.70E-02 | VIPR1,GNB2,RAPGEF4,RAP1A            |
| 3.75E-02 | TP53,PIK3C2G,NFKB2                  |
| 3.65E-02 | PLCE1,PLCG2,GN11,GNB2,PIK3C2G,PLCL1 |
| 3.57E-02 | HDAC6,TP53,PIK3C2G,UBC              |
| 3.85E-02 | TP53,PIK3C2G                        |
| 3.85E-02 | SULT1B1,UGT1A9 (includes others)    |
| 3.85E-02 | SULT1B1,UGT1A9 (includes others)    |
| 3.77E-02 | TP53,PIK3C2G                        |
| 3.77E-02 | PIK3C2G,STAT5B                      |
| 3.45E-02 | DLG1,TUBB3,TJP3,AGGF1,ACTN3,TUBA1C  |
| 3.51E-02 | NGFR,CD36,PIK3C2G,NFKB2             |
| 3.45E-02 | PLCG2,GN11,GNB2,PIK3C2G,NFKB2       |
| 3.45E-02 | NGFR,PIK3C2G,NFKB2,IL37             |
| 3.64E-02 | CAPN5,ACTN3                         |
| 3.49E-02 | PLCG2,NR4,STAT5B                    |
| 3.49E-02 | FSF1,TP53,MMP2                      |
| 3.49E-02 | CAPN5,PLCG2,PIK3C2G                 |
| 3.41E-02 | PLCG2,GN11,GNB2                     |
| 3.51E-02 | PIK3C2G,MMP2                        |

**p-value of overlap Target molecules in dataset**

|          |                                                                                                                                                           |
|----------|-----------------------------------------------------------------------------------------------------------------------------------------------------------|
| 2.68E-04 | FASLG,TP53,TP73                                                                                                                                           |
| 5.83E-04 | ACACA,FDP5,GSR,LDLR,NR0B2,PLS3,RPS24                                                                                                                      |
| 8.23E-04 | BCL2A1,BEEN1,C10A,C10C,CXCL1,CXCL2,DPP4,FCER1G,HLA-DOB1,HRK,LARGE,LGALS9,MMP2,OAS1,PSMB8,SELE,SF3A1,TP73,TRIM22,VIPR1                                     |
| 8.86E-04 | BCL2A1,CCL27,CD83,CHST2,CHST4,CXCL1,CXCL2,DPP4,EDN1,FST,GPX4,MCM3,MMP2,NCK1,NFKB2,NR0B2,OAS1,PSMB8,SCARB1,SELE,TGFB1,TP53,TP533,TRAF1,TSC2D3,VIPR1        |
| 9.25E-04 | SPRY2,TGFB1                                                                                                                                               |
| 1.19E-03 | CN0T8,GMBF,LOXL2,MYBL2,ZFP36L1                                                                                                                            |
| 1.40E-03 | CDK11A,FCER1G,TLR9                                                                                                                                        |
| 1.67E-03 | BCL2A1,FCGR2B,NFKB2,TRAF1,ZFP36L1                                                                                                                         |
| 1.82E-03 | CXCL1,CXCL2,ITGBL1,MMP2,PPP2R2A,TPM3                                                                                                                      |
| 1.85E-03 | HSD3B1,IDI1,LDLR,SCARB1                                                                                                                                   |
| 2.05E-03 | BRE,CD83,CR7AM,CXCL1,CXCL2,DUSP4,EDN1,GREM1,HS3ST3B1,NPC1,RGS13,SNAPC1,SPRY2                                                                              |
| 2.61E-03 | DUSP6,FASLG,FJX1,FST,GATA6,HSD3B1,MMP2,SPRY2,TP53                                                                                                         |
| 3.81E-03 | BAI3,BAP1,CDKN3,CXCL1,CYLC2,DLG1,DUSP4,FASLG,FDP5,GSR,KSR1,MCM3,MCM6,MOG2,MMP2,NFKB2,NR0B2,OAS1,PPP1CC,RGS13,TGFB1,TNFRSF10A,TP53,TP533,TP73,TRIM22,ZFP36 |
| 5.33E-03 | L1                                                                                                                                                        |
| 5.33E-03 | HLA-DQB1,HLA-DRB1                                                                                                                                         |
| 6.54E-03 | AP0B,GPT                                                                                                                                                  |
| 7.24E-03 | BCL2A1,BCL6,CD83,FASLG,FCGR2B,NFKB2,RGS13,TP53                                                                                                            |
| 7.24E-03 | EDN1,FCGR2B,FST,HLA-E,LDLR,PLS3,TACSTD2,TOBI,ZFP36                                                                                                        |
| 7.56E-03 | ARG2,CD83,IL4,MYBL2,PLCG2,TP53                                                                                                                            |
| 7.95E-03 | EDN1,FASLG,TGFB1                                                                                                                                          |
| 8.70E-03 | MMP2,TP53                                                                                                                                                 |
| 8.70E-03 | CXCL1,TGFB1                                                                                                                                               |
| 8.80E-03 | BCL2A1,BCL6,CCL24,CD36,FCER1G,ICAM3,LGALS9,MMP2,OAS1,PGA5 (includes others),TGFB1,TP53,TRIM22                                                             |
| 8.85E-03 | AP0B,BCL2A1,CXCL1,CXCL2,DPP4,EDN1,ENPP1,LDLR,NR0B2,SELE,TGFB1,TOB1                                                                                        |
| 9.22E-03 | CPVL,ENTPD1,EYA4,FZD8,NTRK3,OAS1,RIMKLB,TLR1,TRIM31,WV0X                                                                                                  |
| 1.00E-02 | BCL6,CPO,FBX08,FUT9,HGFAC,NAPA,NR0B2,UGT1A9 (includes others),ZNF155                                                                                      |
| 1.09E-02 | DUSP4,EYA4,MCM3,MCM6,MYBL2,NKX6-1,PPP1R8,RBBP8,STAM,TP53,TP73                                                                                             |
| 1.17E-02 | MMP2,TGFB1,TP53                                                                                                                                           |
| 1.17E-02 | ABHD16A,DPP4,EFNA5                                                                                                                                        |
| 1.24E-02 | BCL6,CCL24,CCR8,CXCL1                                                                                                                                     |
| 1.24E-02 | CXCL1,ENPP1,FCER1G,OAS1                                                                                                                                   |
| 1.28E-02 | ID1,MMP2                                                                                                                                                  |
| 1.28E-02 | MMP2,SELE                                                                                                                                                 |
| 1.41E-02 | CD83,EDN1,GATA6,MMP2,TGFB1,ZFP36                                                                                                                          |
| 1.76E-02 | TNFRSF10A,TP53                                                                                                                                            |
| 1.76E-02 | MCM3,TP53                                                                                                                                                 |
| 1.76E-02 | RPL11,TP53                                                                                                                                                |
| 1.76E-02 | NR2F2,TP53                                                                                                                                                |
| 1.77E-02 | ARHGFE5,ARPC1A,BEEN1,DUSP3,GATA6,HSD3B1,LDLR,MMP2,PLCL1,PSMD1,PSMD3,SCARB1,TM6IM6,TOB1,TP53                                                               |
| 1.91E-02 | BCL2A1,CXCL1,CXCL2,MRC1                                                                                                                                   |
| 2.12E-02 | CXCL2,GPT,LDLR,MCM3,MMP2,RBBP8,RPL10A,TGFB1                                                                                                               |
| 2.29E-02 | LEP,TP53                                                                                                                                                  |
| 2.29E-02 | LOXL2,TP53                                                                                                                                                |
| 2.29E-02 | HEY2,TP53                                                                                                                                                 |
| 2.29E-02 | MMP2,TGFB1                                                                                                                                                |
| 2.29E-02 | ALOX5,CASP14                                                                                                                                              |
| 2.29E-02 | IL4,TSC2D3                                                                                                                                                |
| 2.48E-02 | CD36,IL4,SCARB1                                                                                                                                           |
| 2.54E-02 | CD36,NPC1,SCARB1,TGFB1                                                                                                                                    |
| 2.81E-02 | CD36,HLA-DRB1,MRC1                                                                                                                                        |
| 3.54E-02 | CD36,LDLR                                                                                                                                                 |
| 3.54E-02 | FDP5,LDLR                                                                                                                                                 |
| 3.82E-02 | DUSP4,DUSP6,TNFRSF10A,TP53                                                                                                                                |
| 3.93E-02 | MYBL2,PPP1R8,TP73                                                                                                                                         |
| 4.12E-02 | C10C,C5F2RA,DUSP6,PSMB8                                                                                                                                   |
| 4.24E-02 | LDLR,SCARB1                                                                                                                                               |
| 4.24E-02 | HABP2,TGFB1                                                                                                                                               |
| 4.29E-02 | BCL6,CD83,FCGR2B,NFKB2,TRAF1,ZFP36L1                                                                                                                      |
| 4.34E-02 | MYBL2,PPP1R8,TP53                                                                                                                                         |
| 4.71E-02 | BECN1,CXCL1,CXCL2,EDN1,FASLG,NFKB2,TGFB1,TP53                                                                                                             |
| 4.78E-02 | CD83,FCGR2B,IL4                                                                                                                                           |
| 4.78E-02 | CDKN3,CXCL2,SELE                                                                                                                                          |
| 4.78E-02 | MCM3,MCM6,MYBL2,PKN2,PPP1R8,RBBP8,SS2IP,STAM,TP53                                                                                                         |

|         |           |             |
|---------|-----------|-------------|
| p-value | Molecules | # Molecules |
|---------|-----------|-------------|

|                                                                                                           |                                            |          |                                                                                                                                                                                                                                                                                                                                                                                                                                                                                                                                                                                                                                                                                                                                                                                                                                                             |     |
|-----------------------------------------------------------------------------------------------------------|--------------------------------------------|----------|-------------------------------------------------------------------------------------------------------------------------------------------------------------------------------------------------------------------------------------------------------------------------------------------------------------------------------------------------------------------------------------------------------------------------------------------------------------------------------------------------------------------------------------------------------------------------------------------------------------------------------------------------------------------------------------------------------------------------------------------------------------------------------------------------------------------------------------------------------------|-----|
|                                                                                                           |                                            |          | ABCC4,ACACA,AGGF1,AGPAT2,AGTR2,APOB,ARG2,ASAH2,B4GALT5,BAG4,BAG5,BAP1,BCAS2,BCL2A1,BCL2L10,BCL2L14,BCL6,BECN1,BFAR,BIRC6,BMP7,BNIP1,BRE,CASP14,C4A,C4B,C4C,CA SP14,CCR8,CD36,CDCP1,CRBN,CSF2RA,CTBP2,CUL7,CXCL1,DDX47,DKK3,DP4,DUSP4,DUSP 6,EA2F,EDN1,ENTPD1,ESPL1,FASLG,FBXO5,FCER1A,FCGR2B,FDP5,FIH1,FLI1,FOXG1,FST,GATA 6,GBA2,GLRX,GNA11,GPY4,GSR,HDAC6,HLA DRB1,HNRNP1,HRK,HSF1,ICAM3,IL4,INVS,KIR2DS4 (includes others),KIR3DL1,KLRC1,KMT2A,KSR1,LEP,LGALS9,LMO4,LONP1,LTBR,MCRS1,MPG,MYBL2,MYO 18A,NAE1,NAPA,NCK1,NEU3,NFKB2,NGFR,NOTCH4,NTRK3,PCDH11Y,PDE1B,PIAS1,PITX2,PKN2,PPP1R10,PPP2R2A,PRG3,PRPF19,PSMD7,PTGER3,RAB35,RAPGE4,RAF4,REPS2,RICTOR,RNF144B,RNF34,RPS24,SCARB1,SEMA4D,SF3A1,SHOX,SHH2,SPRY2,STAT5 B,STAT6,SUPV3L1,TGFB1,TGIF2LX,THOC2,THY1,TLR9,TMBIM6,TNFRSF10A,TNFSF8,TP01,TP53,T,TP73,TRAF1,TSC22D3,TUBB3,UCHL1,VPS28,WNK3,WWOX | 137 |
| Cell Death and Survival                                                                                   | cell death                                 | 1.74E-07 |                                                                                                                                                                                                                                                                                                                                                                                                                                                                                                                                                                                                                                                                                                                                                                                                                                                             |     |
|                                                                                                           |                                            |          | ACACA,AGGF1,AGPAT2,AGTR2,ARG2,ASAH2,B4GALT5,BAG4,BAP1,BCAS2,BCL2A1,BCL2L10,BCL 2L14,BCL6,BECN1,BFAR,BIRC6,BMP7,BNIP1,BRE,CASP14,CCR8,CD36,CDCP1,CSF2RA,CTBP2, CXCL1,DDX47,DKK3,DP4,DUSP4,EA2F,EDN1,ENTPD1,ESPL1,FASLG,FBXO5,FCER1A,FCGR2B, FDP5,FIH1,FLI1,FOXG1,FST,GATA6,GBA2,GLRX,GNA11,HDAC6,HNRNP1,HRK,HSF1,ICAM3,IL4,INVS,KI R3DL1,KMT2A,KSR1,LEP,LGALS9,LMO4,LTBR,MCRS1,MPG,MYBL2,MYO18A,NAE1,NAPA,NEU3,N FK2,NGFR,NOTCH4,NTRK3,OAS1,PCDH11Y,PDE1B,PIAS1,PITX2,PKN2,PPP1R10,PPP2R2A,PR PF19,RAP1A,RAPGE4,REPS2,RICTOR,RNF144B,RNF34,RPS24,SCARB1,SEMA4D,SHOX,SHH2,SPRY2,STAT5B,STAT6,SUPV3L1,TGFB1,THY1,TLR9,TMBIM6,TNFRSF10A,TNFSF8,TP01,TP53,T, P73,TRAF1,TSC22D3,UCHL1,WNK3,WWOX                                                                                                                                                                   | 110 |
| Cell Death and Survival                                                                                   | apoptosis                                  | 3.64E-07 |                                                                                                                                                                                                                                                                                                                                                                                                                                                                                                                                                                                                                                                                                                                                                                                                                                                             |     |
| Developmental Disorder, Hereditary Disorder, Metabolic Disease                                            | inborn error of carbohydrate metabolism    | 6.29E-07 | AGL,AGXT,ALG3,ALG6,ATP6V0A2,B3GALNT2,B4GALT1,CTSA,DDOST,GALT,LARGE,LDBH,M6PR MCM6,PGM1,POMGNT1                                                                                                                                                                                                                                                                                                                                                                                                                                                                                                                                                                                                                                                                                                                                                              |     |
|                                                                                                           |                                            |          | AGPAT1,AGPAT2,APOB,ASAH2,B4GALT1,B4GALT4,GBA2,GPX4,IL4,LARGE,LCAT,NEU3,NPC1,N R0B2,PCYT2,PIGY,PLA2G1B,PLCG2,SGPP1,SPTLC2,ST6GALNAC6,ST8SIA2,ST8SIA3                                                                                                                                                                                                                                                                                                                                                                                                                                                                                                                                                                                                                                                                                                         |     |
| Lipid Metabolism, Small Molecule Biochemistry                                                             | metabolism of membrane lipid derivative    | 6.72E-07 |                                                                                                                                                                                                                                                                                                                                                                                                                                                                                                                                                                                                                                                                                                                                                                                                                                                             |     |
|                                                                                                           |                                            |          | ALPL2,ATIC,BCL6,C10A,C4A/C4B,CCL14,CCL24,CD36,CD83,CHST8,CSF2RA,CXCL1,CXCL2,DP 4,DRD3,EDN1,EGFL8,ENTPD1,FCGR2B,FDP5,FZD8,GNB2,GSR,HLA-DOA,HLA-DOB1,HLA- DRB1,HNRNP1,IL10RB,IL4,LDBH,LGALS9,LMO4,MMP2,MRC1,NGFR,NOTCH4,NRG4,PGA5 (includes others),PIK3C2G,PPP1R7,PSMB2,PSMB5,PSMB8,PSMD1,RNF30,RP11,RPS24,RPS3,RPSA,S100 A10,SCML1,SELE,STAT6,TGFB1,TLR1,TLR9,TNFRSF10A,TNFSF8,TP53,TP73,TRAF1,TRIM26,TRI M31,UCHL1,VIPR1,ZFP36                                                                                                                                                                                                                                                                                                                                                                                                                             |     |
| Inflammatory Disease                                                                                      | chronic inflammatory disorder              | 9.23E-06 |                                                                                                                                                                                                                                                                                                                                                                                                                                                                                                                                                                                                                                                                                                                                                                                                                                                             |     |
|                                                                                                           |                                            |          | ABCC4,ACACA,AGGF1,AGPAT2,AGTR2,APOB,ASAH2,B4GALT5,BAG4,BAG5,BAP1,BCAS2,BCL2A1 ,BCL2L10,BCL6,BECN1,BIRC6,BMP7,CASP14,CCR8,CD36,CDCP1,CRBN,CSF2RA,CTBP2,CUL7,C XCL1,DKK3,DP4,DUSP4,EA2F,EDN1,FASLG,FBXO5,FCER1A,FDP5,FIH1,FLI1,FOXG1,FST,GATA 6,GBA2,GLRX,GNA11,GPY4,HDAC6,HNRNP1,HRK,HSF1,IL4,INVS,KIR3DL1,KMT2A,KSR1,LEP,LG ALS9,LMO4,LONP1,LTBR,MCRS1,MPG,MYBL2,NAE1,NAPA,NEU3,NFKB2,NGFR,NOTCH4,NPC1,N TRK3,PCDH11Y,PDE1B,PIAS1,PITX2,PKN2,PPP1R10,PPP2R2A,PRPF19,PSMD7,RAB35,RAPGE4 ,REPS2,RICTOR,RNF144B,RNF34,RPS24,SCARB1,SEMA4D,SF3A1,SHOX,SHH2,SPRY2,STAT5B, STAT6,TGFB1,TGIF2LX,THOC2,THY1,TLR9,TMBIM6,TNFRSF10A,TNFSF8,TP01,TP53,TP73,TRAF 1,TSC22D3,TUBB3,UCHL1,VPS28,WWOX                                                                                                                                                                       |     |
| Cell Death and Survival                                                                                   | necrosis                                   | 1.22E-05 |                                                                                                                                                                                                                                                                                                                                                                                                                                                                                                                                                                                                                                                                                                                                                                                                                                                             |     |
| Cell Death and Survival, Gastrointestinal Disease, Hepatic System Disease                                 | apoptosis of hepatocytes                   | 1.34E-05 |                                                                                                                                                                                                                                                                                                                                                                                                                                                                                                                                                                                                                                                                                                                                                                                                                                                             |     |
|                                                                                                           |                                            |          | ACACA,AGPAT2,BAP1,BCAS2,BCL2A1,BCL2L10,BCL6,BECN1,BIRC6,BMP7,CASP14,CDCP1,CSF2 RA,CTBP2,DKK3,DP4,DUSP4,EA2F,EDN1,FASLG,FBXO5,FCER1A,FIH1,FLI1,FOXG1,FST,GATA6, GBA2,GLRX,GNA11,HDAC6,HNRNP1,HSF1,IL4,INVS,KIR3DL1,KMT2A,KSR1,LEP,LMO4,MCRS1, MPG,NAPA,NEU3,NFKB2,NGFR,NOTCH4,NTRK3,PCDH11Y,PDE1B,PIAS1,PPP1R10,PPP2R2A,PR PF19,RAPGE4,REPS2,RICTOR,RNF144B,RNF34,RPS24,SCARB1,SHOX,SHH2,SPRY2,STAT5B, STAT6,TGFB1,THY1,TMBIM6,TNFRSF10A,TP01,TP53,TP73,TRAF1,TSC22D3,UCHL1,WWOX                                                                                                                                                                                                                                                                                                                                                                             |     |
| Cell Death and Survival                                                                                   | apoptosis of tumor cell lines              | 1.71E-05 |                                                                                                                                                                                                                                                                                                                                                                                                                                                                                                                                                                                                                                                                                                                                                                                                                                                             |     |
| Lipid Metabolism, Small Molecule Biochemistry                                                             | synthesis of lipid                         | 2.03E-05 | AGPAT1,AGPAT2,BMP7,CD83,CXCL1,DKK3,DP4,EDN1,EDNRA,FCER1A,GBA2,GPAM,HSD3B1,I D1,IL4,LARGE,LCAT,LEP,MGST2,NPC1,OXSM,PCYT2,PIGY,PLA2G1B,PLA2G2D,PLCE1,PLCG2,P RG3,SPTLC2,ST8SIA2,ST8SIA3,TP53                                                                                                                                                                                                                                                                                                                                                                                                                                                                                                                                                                                                                                                                  |     |
| Carbohydrate Metabolism                                                                                   | metabolism of carbohydrate                 | 2.85E-05 | AGPAT1,AGPAT2,APLN,RB4GALT1,B4GALT2,B4GALT1,B4GALT7,CCKBR,CHST12,CHST2,CH ST4,CHST8,ENPP1,FUT9,GALT,HS3ST3B1,LARGE,LCAT,MGAT1,NEU3,PIGY,PLA2G1B,PLCG2,PP P1CC,ST6GALNAC6,ST8SIA2,ST8SIA3,TGFB1                                                                                                                                                                                                                                                                                                                                                                                                                                                                                                                                                                                                                                                              |     |
| Post-Translational Modification                                                                           | glycosylation of protein                   | 3.56E-05 | ALG6,B4GALT1,DDOST,FUT9,MGAT1,NPC1,POFUT1,POMGNT1,ST8SIA2,ST8SIA3                                                                                                                                                                                                                                                                                                                                                                                                                                                                                                                                                                                                                                                                                                                                                                                           |     |
|                                                                                                           |                                            |          | ABCC4,ACACA,AGPAT2,APOB,BAP1,BCAS2,BCL2A1,BCL2L10,BCL6,BECN1,BIRC6,BMP7,CASP1 4,CDCP1,CRBN,CSF2RA,CTBP2,CUL7,DKK3,DP4,DUSP4,EA2F,EDN1,FASLG,FBXO5,FCER1A,F HIT,FLI1,FOXG1,FST,GATA6,GBA2,GLRX,GNA11,GPY4,HDAC6,HNRNP1,HSF1,IL4,INVS,KIR3DL1 KMT2A,KSR1,LEP,LMO4,LONP1,LTBR,MCRS1,MPG,MYBL2,NAPAE1,NAPA,NEU3,NFKB2,NGFR,NOTCH4, NTRK3,PCDH11Y,PDE1B,PIAS1,PPP1R10,PPP2R2A,PRPF19,PSMD7,RAB35,RAPGE4,REPS2,RI CTOR,RNF144B,RNF34,RPS24,SCARB1,SF3A1,SHOX,SHH2,SPRY2,STAT5B,STAT6,TGFB1,TGIF2L X,THOC2,THY1,TMBIM6,TNFRSF10A,TP01,TP53,TP73,TRAF1,TSC22D3,TUBB3,UCHL1,VPS28, WWOX                                                                                                                                                                                                                                                                              |     |
| Cell Death and Survival                                                                                   | cell death of tumor cell lines             | 5.19E-05 |                                                                                                                                                                                                                                                                                                                                                                                                                                                                                                                                                                                                                                                                                                                                                                                                                                                             |     |
| Developmental Disorder, Hereditary Disorder, Metabolic Disease                                            | congenital disorders of glycosylation      | 5.62E-05 | ALG3,ALG6,ATP6V0A2,B3GALNT2,B4GALT1,DDOST,LARGE,PGM1,POMGNT1                                                                                                                                                                                                                                                                                                                                                                                                                                                                                                                                                                                                                                                                                                                                                                                                |     |
| Lipid Metabolism, Molecular Transport, Small Molecule Biochemistry                                        | transport of cholesterol                   | 6.88E-05 | APOB,CD36,LCAT,LDLR,NPC1                                                                                                                                                                                                                                                                                                                                                                                                                                                                                                                                                                                                                                                                                                                                                                                                                                    |     |
| Cellular Movement                                                                                         | migration of ovarian cancer cell lines     | 8.05E-05 | CDCP1,CTBP2,DP4,EDN1,IQGAP1,TP53,WWOX                                                                                                                                                                                                                                                                                                                                                                                                                                                                                                                                                                                                                                                                                                                                                                                                                       |     |
| Cellular Movement                                                                                         | cell movement of ovarian cancer cell lines | 1.01E-04 | CDCP1,CTBP2,DP4,EDN1,IQGAP1,TGFB1,TP53,WWOX                                                                                                                                                                                                                                                                                                                                                                                                                                                                                                                                                                                                                                                                                                                                                                                                                 |     |
| Lipid Metabolism, Small Molecule Biochemistry                                                             | metabolism of sphingolipid                 | 1.19E-04 | ASAH2,B4GALT1,GBA2,LARGE,NEU3,SGPP1,SPTLC2,ST6GALNAC6,ST8SIA2,ST8SIA3                                                                                                                                                                                                                                                                                                                                                                                                                                                                                                                                                                                                                                                                                                                                                                                       |     |
| Gene Expression                                                                                           | synthesis of rRNA                          | 1.52E-04 | ERCC8,FST,TP53                                                                                                                                                                                                                                                                                                                                                                                                                                                                                                                                                                                                                                                                                                                                                                                                                                              |     |
| RNA Post-Transcriptional Modification                                                                     | processing of mRNA                         | 1.70E-04 | CDK11A,CELF1,DDX39A,HNRNP1,PRPF19,RBM11A1 (includes others),SF3A1,SF3B2,SNRNP1,SRSF4,SRSF6,SRSF9,SUP75H                                                                                                                                                                                                                                                                                                                                                                                                                                                                                                                                                                                                                                                                                                                                                     |     |
| Post-Translational Modification                                                                           | ubiquitination of protein                  | 1.83E-04 | RIM13,TRIM17,TRIM23,UBE4B,VPS28                                                                                                                                                                                                                                                                                                                                                                                                                                                                                                                                                                                                                                                                                                                                                                                                                             |     |
| Cancer, Gastrointestinal Disease                                                                          | metastatic colorectal carcinoma            | 1.95E-04 | DUSP4,FASLG,LGR4,MMP2,TP01                                                                                                                                                                                                                                                                                                                                                                                                                                                                                                                                                                                                                                                                                                                                                                                                                                  |     |
|                                                                                                           |                                            |          | AGGF1,BCAS2,CDK11A,CELF1,DDX39A,DDX47,HNRNP1,INTS8,PRPF19,RBM11A1 (includes others),RPL11,RPS24,SF3A1,SF3B2,SNRNP1,SRSF4,SRSF6,SRSF9,SUP75H,UTP20                                                                                                                                                                                                                                                                                                                                                                                                                                                                                                                                                                                                                                                                                                           |     |
| RNA Post-Transcriptional Modification                                                                     | processing of RNA                          | 1.98E-04 |                                                                                                                                                                                                                                                                                                                                                                                                                                                                                                                                                                                                                                                                                                                                                                                                                                                             |     |
| Gastrointestinal Disease, Hepatic System Disease, Organismal Injury and Abnormalities                     | cirrhosis of liver                         | 2.36E-04 | ABCC4,APOB,CSF2RA,DLG1,FASLG,FST,HLA-DOB1,IL4,LDLR,LEP,NOTCH4,TGFB1,TLR9,TP73 14                                                                                                                                                                                                                                                                                                                                                                                                                                                                                                                                                                                                                                                                                                                                                                            |     |
|                                                                                                           |                                            |          | ABCC4,APOB,CSF2RA,DLG1,FASLG,FST,HLA-DOB1,IL4,LDLR,LEP,NOTCH4,TGFB1,TLR9,TP73 14                                                                                                                                                                                                                                                                                                                                                                                                                                                                                                                                                                                                                                                                                                                                                                            |     |
| Connective Tissue Disorders, Immunological Disease, Inflammatory Disease, Skeletal and Muscular Disorders | rheumatoid arthritis                       | 2.38E-04 | BACH1,BCL11B,BCL6,BMP7,BRF1,CBFB,CTCF,DKK3,EDN1,ENY2,FASLG,FLI1,FOXG1,FST,FZD4 ,GATA6,GMEB2,GREM1,GTF2A1L,GTFC3A4,HDAC6,HEY2,HNRNP1,HSF1,HTATSF1,IL10RB,IL4,IQ GAP1,KMT2A,LCP1,LGALS9,LOXL2,LRRFP1,LTBR,MED20,NCK1,NFKB2,NOTCH4,NRF2,PCDH1 1Y,PIAS1,PITX2,PLA2G1B,PPP1R8,PSMB2,PSMC3,PTGER3,RBBP9,RNF111,RNF20,RPL6,SHOX,S KAP1,SOX30,SRSF6,STAT5B,STAT6,STK36,SUP75H,TA1,TFEB,TGFB1,TLR1,TP01,TP53,TP73,T RIM13,TRIM17,TRIM22,TSC22D3,ZHX2,ZNF141,ZNF202,ZNF345,ZNF366,ZNF367,ZNF76                                                                                                                                                                                                                                                                                                                                                                        |     |
| Gene Expression                                                                                           | transcription                              | 3.47E-04 |                                                                                                                                                                                                                                                                                                                                                                                                                                                                                                                                                                                                                                                                                                                                                                                                                                                             |     |
| Cardiovascular System Development and Function, Tissue Morphology                                         | contraction of blood vessel                | 3.70E-04 | EDN1,IL4,TGFB1                                                                                                                                                                                                                                                                                                                                                                                                                                                                                                                                                                                                                                                                                                                                                                                                                                              |     |
| Cancer, Cell Cycle                                                                                        | polyploidy of tumor cell lines             | 3.70E-04 | FBXO5,GATA6,SPRY2                                                                                                                                                                                                                                                                                                                                                                                                                                                                                                                                                                                                                                                                                                                                                                                                                                           |     |
| Metabolic Disease                                                                                         | systemic light chain amyloidosis           | 3.70E-04 | PSMB2,PSMB5,PSMD1                                                                                                                                                                                                                                                                                                                                                                                                                                                                                                                                                                                                                                                                                                                                                                                                                                           |     |
| Cell Death and Survival                                                                                   | cell death of prostate cancer cell lines   | 3.82E-04 | ACACA,BECN1,BIRC6,BMP7,DKK3,EA2F,EDN1,FASLG,FST,NAPA,NFKB2,NGFR,SHH2,TGFB1,TM BIM6,TNFRSF10A,TP01,TP53                                                                                                                                                                                                                                                                                                                                                                                                                                                                                                                                                                                                                                                                                                                                                      |     |
|                                                                                                           |                                            |          | BACH1,BCL11B,BCL6,BMP7,BRF1,CBFB,CTCF,DKK3,EDN1,ENY2,FASLG,FLI1,FOXG1,FST,FZD4 ,GATA6,GMEB2,GREM1,GTF2A1L,GTFC3A4,HDAC6,HEY2,HNRNP1,HSF1,HTATSF1,IL10RB,IL4,IQ GAP1,KMT2A,LCP1,LGALS9,LOXL2,LRRFP1,LTBR,MED20,NCK1,NFKB2,NOTCH4,NRF2,PCDH1 1Y,PIAS1,PITX2,PLA2G1B,PPP1R8,PSMB2,PSMC3,PTGER3,RBBP9,RNF111,RNF20,RPL6,SHOX,S KAP1,SOX30,SRSF6,STAT5B,STAT6,STK36,SUP75H,TA1,TFEB,TGFB1,TLR1,TP01,TP53,TP73,T RIM13,TRIM17,TRIM22,TSC22D3,ZHX2,ZNF141,ZNF202,ZNF345,ZNF366,ZNF367,ZNF76                                                                                                                                                                                                                                                                                                                                                                        |     |
| Gene Expression                                                                                           | transcription of RNA                       | 4.01E-04 |                                                                                                                                                                                                                                                                                                                                                                                                                                                                                                                                                                                                                                                                                                                                                                                                                                                             |     |
| Cancer, Gastrointestinal Disease, Respiratory Disease                                                     | nasopharyngeal cancer                      | 4.16E-04 | FBLN2,LTBR,MMP2,THY1,TP01,TP53,TUBA1C,TUBB3,UCHL1                                                                                                                                                                                                                                                                                                                                                                                                                                                                                                                                                                                                                                                                                                                                                                                                           |     |

|                                                                                                                                                           |  |                                                                                                                                                                                                                                                                                                                                                                          |                                                                                                                                                                                                                                                                                                                                                                                                                                                                                                                |          |    |
|-----------------------------------------------------------------------------------------------------------------------------------------------------------|--|--------------------------------------------------------------------------------------------------------------------------------------------------------------------------------------------------------------------------------------------------------------------------------------------------------------------------------------------------------------------------|----------------------------------------------------------------------------------------------------------------------------------------------------------------------------------------------------------------------------------------------------------------------------------------------------------------------------------------------------------------------------------------------------------------------------------------------------------------------------------------------------------------|----------|----|
|                                                                                                                                                           |  |                                                                                                                                                                                                                                                                                                                                                                          | ASMT,BACH1,BCL11B,BCL6,BMP7,BRF1,CBFB,CTCF,DKK3,EDN1,EIF3B,EIF3C,ENVY2,FASLG,FLI1,FOXG1,FST,FZD4,GATA6,GLM3,GMEB2,GREM1,GT2A,IL6,GFSC4,HDAC6,HEY2,HNRNP1A,HS1,HTATSF1,IL10RB,IL4,IQGAP1,KMT2A,LCP2,LGALS9,LOXL2,LRRFP1,LTRB,MED20,METAP1,NCK1,NFKB2,NOTCH4,NR2F2,PCDH11Y,PIAS1,PITX2,PLA2G1B,PPP1R8,PRG3,PSMC3,PTGER3,RBPB8,RNF111,RNF20,RPL6,SHOX,SKAP1,SOX30,SPRY2,STAT5B,STAT6,STK36,SUPT5H,TAF11,TFEB,TGFBI,TFE1,TFPI1,TP53,TP73,TRIM13,TRIM17,TRIM22,TSC22D3,ZH2,ZNF141,ZNF202,ZNF345,ZNF366,ZNF367,ZNF78 | 5.22E-04 | 82 |
| Gene Expression                                                                                                                                           |  | expression of RNA                                                                                                                                                                                                                                                                                                                                                        |                                                                                                                                                                                                                                                                                                                                                                                                                                                                                                                | 5.23E-04 | 4  |
| Cellular Growth and Proliferation                                                                                                                         |  | cytostasis of lung cancer cell lines                                                                                                                                                                                                                                                                                                                                     |                                                                                                                                                                                                                                                                                                                                                                                                                                                                                                                | 5.23E-04 | 4  |
| Metabolic Disease                                                                                                                                         |  | systemic amyloidosis                                                                                                                                                                                                                                                                                                                                                     |                                                                                                                                                                                                                                                                                                                                                                                                                                                                                                                | 5.23E-04 | 4  |
| Lipid Metabolism, Molecular Transport, Small Molecule Biochemistry                                                                                        |  | uptake of cholesterol                                                                                                                                                                                                                                                                                                                                                    |                                                                                                                                                                                                                                                                                                                                                                                                                                                                                                                |          |    |
| Cardiovascular Disease                                                                                                                                    |  | occlusion of artery                                                                                                                                                                                                                                                                                                                                                      |                                                                                                                                                                                                                                                                                                                                                                                                                                                                                                                | 5.86E-04 | 37 |
|                                                                                                                                                           |  | ABHD16A,AGPAT1,APLP2,ATIC,BCL6,C10A,C4A,C4B,CCL14,CCL24,CD36,CD83,CHST8,CTSA,CXCL1,CXCL2,DDP4,EGFL8,FASLG,FCGR2B,FDPS,GNB2,GSR,HLA-DOA,HLA-DOB1,HLA-DRB1,HNRNP1A,IL4,LDBL,LMO4,MMP2,MRC1,NGFR,NOTCH4,OAS1,PGM1,PPP1R7,PSMB8,PTGER3,RNF39,RPL11,RPS24,RPS3,RPS4,S100A10,SCML1,SELE,STAT6,TGFBI,TLR9,TNFRSF10A,TP53,TRAF1,TRIM2,TRIM51,VIPR1,XKR6,ZFP96                    |                                                                                                                                                                                                                                                                                                                                                                                                                                                                                                                |          |    |
| Immunological Disease                                                                                                                                     |  | systemic autoimmune syndrome                                                                                                                                                                                                                                                                                                                                             |                                                                                                                                                                                                                                                                                                                                                                                                                                                                                                                | 6.10E-04 | 57 |
|                                                                                                                                                           |  | BCL11B,BCL6,BMP7,BRF1,CBFB,CTCF,DKK3,EDN1,ENVY2,FASLG,FOXG1,FST,FZD4,GATA6,GLM3,GMEB2,GREM1,GT2A,IL6,HDAC6,HEY2,HSF1,HTATSF1,IL4,KMT2A,LOXL2,LRRFP1,MED20,NCCK1,NFKB2,NOTCH4,NR2F2,PITX2,PLA2G1B,PTGER3,RBPB8,RNF111,RNF20,RPL6,SHOX,SKAP1,SOX30,SPRY2,STAT5B,STAT6,SUPT5H,TAF1,TFEB,TGFBI,TFE1,TP53,TP73,TRIM22,TSC22D3,ZH2,ZNF141,ZNF202,ZNF345,ZNF366,ZNF367,ZNF78    |                                                                                                                                                                                                                                                                                                                                                                                                                                                                                                                |          |    |
| Gene Expression                                                                                                                                           |  | expression of DNA                                                                                                                                                                                                                                                                                                                                                        |                                                                                                                                                                                                                                                                                                                                                                                                                                                                                                                | 6.24E-04 | 6  |
| Cancer, Hematological Disease, Immunological Disease, Organismal Injury and Abnormalities                                                                 |  | mantle cell lymphoma                                                                                                                                                                                                                                                                                                                                                     |                                                                                                                                                                                                                                                                                                                                                                                                                                                                                                                | 6.36E-04 | 60 |
|                                                                                                                                                           |  | ADAT,ADAR,APOB,BAG5,CD36,CD83,CDCP1,CPVL,CSMD1,CTSA,EDN1,ENPP1,FUT9,GATA6,GLRX,HABP2,HLA-DRB1,IL4,LDLR,LPXN,MMP2,MYO3B,NPR1,NR2F2,PDE4DIP,PTGER3,RPL9,RUVBL2,SCARB1,SELE,SLC22A3,SSX2IP,SUPV3L1,TGFBI,THY1,TUBA1C,TUBB3,UTP20,WWOX,ZFP36                                                                                                                                 |                                                                                                                                                                                                                                                                                                                                                                                                                                                                                                                |          |    |
| Cardiovascular Disease                                                                                                                                    |  | disorder of artery                                                                                                                                                                                                                                                                                                                                                       |                                                                                                                                                                                                                                                                                                                                                                                                                                                                                                                | 6.61E-04 | 41 |
| Cellular Growth and Proliferation                                                                                                                         |  | colony formation of lymphoma cell lines                                                                                                                                                                                                                                                                                                                                  |                                                                                                                                                                                                                                                                                                                                                                                                                                                                                                                | 7.21E-04 | 3  |
| Cellular Growth and Proliferation                                                                                                                         |  | cytostasis of bone cancer cell lines                                                                                                                                                                                                                                                                                                                                     |                                                                                                                                                                                                                                                                                                                                                                                                                                                                                                                | 7.21E-04 | 3  |
| Organismal Injury and Abnormalities, Renal and Urological Disease                                                                                         |  | hematuria                                                                                                                                                                                                                                                                                                                                                                |                                                                                                                                                                                                                                                                                                                                                                                                                                                                                                                | 7.21E-04 | 3  |
| Cellular Assembly and Organization                                                                                                                        |  | quantity of lysosome                                                                                                                                                                                                                                                                                                                                                     |                                                                                                                                                                                                                                                                                                                                                                                                                                                                                                                | 7.21E-04 | 3  |
| Carbohydrate Metabolism, Small Molecule Biochemistry                                                                                                      |  | signaling of inositol phosphate                                                                                                                                                                                                                                                                                                                                          |                                                                                                                                                                                                                                                                                                                                                                                                                                                                                                                | 7.21E-04 | 3  |
| Infectious Disease                                                                                                                                        |  | transmission of virus                                                                                                                                                                                                                                                                                                                                                    |                                                                                                                                                                                                                                                                                                                                                                                                                                                                                                                | 7.21E-04 | 3  |
| Cellular Growth and Proliferation, Hematological System Development and Function                                                                          |  | inhibition of lymphocytes                                                                                                                                                                                                                                                                                                                                                |                                                                                                                                                                                                                                                                                                                                                                                                                                                                                                                | 7.36E-04 | 4  |
| Nucleic Acid Metabolism, Small Molecule Biochemistry                                                                                                      |  | phosphorylation of nucleotide                                                                                                                                                                                                                                                                                                                                            |                                                                                                                                                                                                                                                                                                                                                                                                                                                                                                                | 7.36E-04 | 4  |
| Gene Expression                                                                                                                                           |  | synthesis of RNA                                                                                                                                                                                                                                                                                                                                                         |                                                                                                                                                                                                                                                                                                                                                                                                                                                                                                                | 7.36E-04 | 4  |
|                                                                                                                                                           |  | ERCC8,FST,HTATSF1,TP53                                                                                                                                                                                                                                                                                                                                                   |                                                                                                                                                                                                                                                                                                                                                                                                                                                                                                                |          |    |
| Gene Expression                                                                                                                                           |  | transcription of DNA                                                                                                                                                                                                                                                                                                                                                     |                                                                                                                                                                                                                                                                                                                                                                                                                                                                                                                | 9.01E-04 | 58 |
| Carbohydrate Metabolism                                                                                                                                   |  | synthesis of carbohydrate                                                                                                                                                                                                                                                                                                                                                |                                                                                                                                                                                                                                                                                                                                                                                                                                                                                                                | 9.41E-04 | 17 |
| Connective Tissue Disorders, Skeletal and Muscular Disorders                                                                                              |  | osteopenia                                                                                                                                                                                                                                                                                                                                                               |                                                                                                                                                                                                                                                                                                                                                                                                                                                                                                                | 1.00E-03 | 4  |
| Cell Death and Survival                                                                                                                                   |  | cell death of fibrosarcoma cell lines                                                                                                                                                                                                                                                                                                                                    |                                                                                                                                                                                                                                                                                                                                                                                                                                                                                                                | 1.01E-03 | 8  |
| Lipid Metabolism, Small Molecule Biochemistry                                                                                                             |  | metabolism of glycosphingolipid                                                                                                                                                                                                                                                                                                                                          |                                                                                                                                                                                                                                                                                                                                                                                                                                                                                                                | 1.01E-03 | 4  |
| Metabolic Disease                                                                                                                                         |  | light chain associated amyloidosis                                                                                                                                                                                                                                                                                                                                       |                                                                                                                                                                                                                                                                                                                                                                                                                                                                                                                | 1.01E-03 | 4  |
| Cancer                                                                                                                                                    |  | primitive neuroectodermal tumor                                                                                                                                                                                                                                                                                                                                          |                                                                                                                                                                                                                                                                                                                                                                                                                                                                                                                | 1.13E-03 | 15 |
| Cell Morphology, Cellular Function and Maintenance                                                                                                        |  | autophagy of Cytoplasm                                                                                                                                                                                                                                                                                                                                                   |                                                                                                                                                                                                                                                                                                                                                                                                                                                                                                                | 1.15E-03 | 2  |
| Cellular Development, Tissue Development                                                                                                                  |  | epithelial-mesenchymal transition of fibroblasts                                                                                                                                                                                                                                                                                                                         |                                                                                                                                                                                                                                                                                                                                                                                                                                                                                                                | 1.15E-03 | 2  |
| Cellular Development, Tissue Development                                                                                                                  |  | epithelial-mesenchymal transition of hepatocytes                                                                                                                                                                                                                                                                                                                         |                                                                                                                                                                                                                                                                                                                                                                                                                                                                                                                | 1.15E-03 | 2  |
| Cell-To-Cell Signaling and Interaction                                                                                                                    |  | gap junctional intercellular communication of smooth muscle cells                                                                                                                                                                                                                                                                                                        |                                                                                                                                                                                                                                                                                                                                                                                                                                                                                                                | 1.15E-03 | 2  |
| Cancer                                                                                                                                                    |  | growth of head and neck squamous cell carcinoma                                                                                                                                                                                                                                                                                                                          |                                                                                                                                                                                                                                                                                                                                                                                                                                                                                                                | 1.15E-03 | 2  |
| Neurological Disease, Psychological Disorders                                                                                                             |  | hypersomnia                                                                                                                                                                                                                                                                                                                                                              |                                                                                                                                                                                                                                                                                                                                                                                                                                                                                                                | 1.15E-03 | 2  |
| Cell Cycle                                                                                                                                                |  | mitogenesis of leukocytes                                                                                                                                                                                                                                                                                                                                                |                                                                                                                                                                                                                                                                                                                                                                                                                                                                                                                | 1.15E-03 | 2  |
| Cell Morphology                                                                                                                                           |  | morphology of skin cell lines                                                                                                                                                                                                                                                                                                                                            |                                                                                                                                                                                                                                                                                                                                                                                                                                                                                                                | 1.15E-03 | 2  |
| Cell-To-Cell Signaling and Interaction, Hematological System Development and Function, Immune Cell Trafficking, Inflammatory Response                     |  | activation of dendritic cells                                                                                                                                                                                                                                                                                                                                            |                                                                                                                                                                                                                                                                                                                                                                                                                                                                                                                | 1.22E-03 | 6  |
| Developmental Disorder, Gastrointestinal Disease, Hematological Disease, Hepatic System Disease                                                           |  | Wilson's disease                                                                                                                                                                                                                                                                                                                                                         |                                                                                                                                                                                                                                                                                                                                                                                                                                                                                                                | 1.23E-03 | 3  |
| Hereditary Disorder, Metabolic Disease, Neurological Disease, Nutritional Disease                                                                         |  | brain metastasis                                                                                                                                                                                                                                                                                                                                                         |                                                                                                                                                                                                                                                                                                                                                                                                                                                                                                                | 1.23E-03 | 3  |
| Cancer, Neurological Disease                                                                                                                              |  | cytostasis of carcinoma cell lines                                                                                                                                                                                                                                                                                                                                       |                                                                                                                                                                                                                                                                                                                                                                                                                                                                                                                | 1.23E-03 | 3  |
| Cellular Growth and Proliferation                                                                                                                         |  | gap junctional intercellular communication of cells                                                                                                                                                                                                                                                                                                                      |                                                                                                                                                                                                                                                                                                                                                                                                                                                                                                                | 1.23E-03 | 3  |
| Cell-To-Cell Signaling and Interaction                                                                                                                    |  | metabolism of N-acetylglucosamine                                                                                                                                                                                                                                                                                                                                        |                                                                                                                                                                                                                                                                                                                                                                                                                                                                                                                | 1.23E-03 | 3  |
| Carbohydrate Metabolism, Small Molecule Biochemistry                                                                                                      |  | medulloblastoma                                                                                                                                                                                                                                                                                                                                                          |                                                                                                                                                                                                                                                                                                                                                                                                                                                                                                                | 1.28E-03 | 9  |
| Cancer, Neurological Disease                                                                                                                              |  |                                                                                                                                                                                                                                                                                                                                                                          |                                                                                                                                                                                                                                                                                                                                                                                                                                                                                                                |          |    |
| Lipid Metabolism, Small Molecule Biochemistry                                                                                                             |  | fatty acid metabolism                                                                                                                                                                                                                                                                                                                                                    |                                                                                                                                                                                                                                                                                                                                                                                                                                                                                                                | 1.37E-03 | 22 |
| Cellular Development, Hematopoiesis                                                                                                                       |  | maturation of leukocytes                                                                                                                                                                                                                                                                                                                                                 |                                                                                                                                                                                                                                                                                                                                                                                                                                                                                                                | 1.41E-03 | 7  |
| Gastrointestinal Disease, Hepatic System Disease, Inflammatory Disease, Organismal Injury and Abnormalities                                               |  | primary biliary cirrhosis                                                                                                                                                                                                                                                                                                                                                |                                                                                                                                                                                                                                                                                                                                                                                                                                                                                                                | 1.43E-03 | 10 |
| Cell Death and Survival                                                                                                                                   |  | cytotoxicity of T lymphocytes                                                                                                                                                                                                                                                                                                                                            |                                                                                                                                                                                                                                                                                                                                                                                                                                                                                                                | 1.61E-03 | 5  |
| Cell-To-Cell Signaling and Interaction, Cellular Compromise                                                                                               |  | respiratory burst of cells                                                                                                                                                                                                                                                                                                                                               |                                                                                                                                                                                                                                                                                                                                                                                                                                                                                                                | 1.61E-03 | 5  |
|                                                                                                                                                           |  | ABCC4,APOB,CSF2RA,DLG1,FST,HLA-DOB1,IL4,LDLR,NOTCH4,TLR9                                                                                                                                                                                                                                                                                                                 |                                                                                                                                                                                                                                                                                                                                                                                                                                                                                                                |          |    |
| Cell-To-Cell Signaling and Interaction                                                                                                                    |  | communication of cells                                                                                                                                                                                                                                                                                                                                                   |                                                                                                                                                                                                                                                                                                                                                                                                                                                                                                                | 1.62E-03 | 12 |
|                                                                                                                                                           |  | AGTR2,APLN,ASAH2,BAG4,BAI3,BRE,C10A,CAPN5,CCL24,CCL27,CCR8,CD3G,CD83,CHST4,CXCL1,DRD3,EDN1,EDNRA,FASLG,FCGR2B,FGF17,GMFB,GNA11,GNB2,HDAC6,HLA-DOA,ICK,IL10RB,IQGAP1,KLRC1,KLRC3,LGALS9,IL1RB5,LPXN,LTBR,M6PR,MPP1,NAE1,NMU1,NPC1,NR2F2,PLA2G1B,PPP1R12B,PTCH2,PTGER3,RAP1A,RAPGEF4,RHO,SIK2,SKAP2,STAM1,STAT6,TACSTD2,TGFBI,TFE1,TFE2,TNFRSF10A,TNFSF8,TOB1,TRIM13,VIPR1 |                                                                                                                                                                                                                                                                                                                                                                                                                                                                                                                |          |    |
| Cell Death and Survival                                                                                                                                   |  | apoptosis of prostate cancer cell lines                                                                                                                                                                                                                                                                                                                                  |                                                                                                                                                                                                                                                                                                                                                                                                                                                                                                                | 1.65E-03 | 62 |
| Lipid Metabolism, Small Molecule Biochemistry                                                                                                             |  | metabolism of glycolipid                                                                                                                                                                                                                                                                                                                                                 |                                                                                                                                                                                                                                                                                                                                                                                                                                                                                                                | 1.67E-03 | 9  |
| Carbohydrate Metabolism                                                                                                                                   |  | synthesis of polysaccharide                                                                                                                                                                                                                                                                                                                                              |                                                                                                                                                                                                                                                                                                                                                                                                                                                                                                                | 1.67E-03 | 9  |
| RNA Post-Transcriptional Modification                                                                                                                     |  | splicing of mRNA                                                                                                                                                                                                                                                                                                                                                         |                                                                                                                                                                                                                                                                                                                                                                                                                                                                                                                | 1.71E-03 | 11 |
|                                                                                                                                                           |  | ACACA,BIRC6,BMP7,DKK3,EA2F,EDN1,FASLG,FST,NAPA,NGFR,SIAH2,TGFBI,TMBIM6,TNFRSF10A,TP53                                                                                                                                                                                                                                                                                    |                                                                                                                                                                                                                                                                                                                                                                                                                                                                                                                |          |    |
| RNA Post-Transcriptional Modification                                                                                                                     |  | splicing of RNA                                                                                                                                                                                                                                                                                                                                                          |                                                                                                                                                                                                                                                                                                                                                                                                                                                                                                                | 1.72E-03 | 8  |
| Hematological Disease, Immunological Disease                                                                                                              |  | eosinophilia                                                                                                                                                                                                                                                                                                                                                             |                                                                                                                                                                                                                                                                                                                                                                                                                                                                                                                | 1.78E-03 | 7  |
| Post-Translational Modification                                                                                                                           |  | polyubiquitination of protein                                                                                                                                                                                                                                                                                                                                            |                                                                                                                                                                                                                                                                                                                                                                                                                                                                                                                | 1.78E-03 | 7  |
| Cell-To-Cell Signaling and Interaction, Hematological System Development and Function, Immune Cell Trafficking, Inflammatory Response, Tissue Development |  | binding of dendritic cells                                                                                                                                                                                                                                                                                                                                               |                                                                                                                                                                                                                                                                                                                                                                                                                                                                                                                | 1.92E-03 | 3  |
| Cellular Development, Hematological System Development and Function, Hematopoiesis                                                                        |  | maturation of lymphocytes                                                                                                                                                                                                                                                                                                                                                |                                                                                                                                                                                                                                                                                                                                                                                                                                                                                                                | 1.92E-03 | 3  |
|                                                                                                                                                           |  | AGTR2,APLN,ASAH2,BAG4,BAI3,BRE,CAPN5,CCL24,CCR8,CD3G,CD83,CXCL1,DRD3,EDN1,EDNRA,FASLG,FCGR2B,FGF17,GMFB,GNA11,GNB2,HDAC6,HLA-DOA,ICK,IL10RB,IQGAP1,KLRC1,KLRC3,LGALS9,IL1RB5,LPXN,LTBR,M6PR,MPP1,NAE1,NMU1,NPC1,NR2F2,PLA2G1B,PPP1R12B,PTCH2,PTGER3,RAP1A,RAPGEF4,RHO,SIK2,SKAP2,STAM1,STAT6,TACSTD2,TFE1,TFE2,TNFRSF10A,TNFSF8,TOB1,TRIM13,VIPR1                        |                                                                                                                                                                                                                                                                                                                                                                                                                                                                                                                |          |    |
| Cell-To-Cell Signaling and Interaction                                                                                                                    |  | signal transduction                                                                                                                                                                                                                                                                                                                                                      |                                                                                                                                                                                                                                                                                                                                                                                                                                                                                                                | 1.93E-03 | 57 |
|                                                                                                                                                           |  | APLP2,ATIC,BCL6,C10A,CCL14,CCL24,CD36,CD83,CHST6,CXCL1,CXCL2,DDP4,EDN1,EGFL8,ENPP1,FCGR2B,FDPS,GNB2,GSR,HLA-DOA,HLA-DOB1,HLA-DRB1,HLA-DRB1,HLA-E,HNRNP1A,IL4,LDBL,LMO4,MMP2,MRC1,NGFR,NOTCH4,PPP1R7,PSMB8,RNF39,RPL11,RPS24,RPS3,RPS4,S100A10,SCML1,SELE,SLC1A7,STAT6,TGFBI,TLR9,TNFRSF10A,TP53,TRAF1,TRIM2,TRIM3,TUBA1C,TUBB3,VIPR1,ZFP36                               |                                                                                                                                                                                                                                                                                                                                                                                                                                                                                                                |          |    |
| Connective Tissue Disorders, Skeletal and Muscular Disorders                                                                                              |  | arthropathy                                                                                                                                                                                                                                                                                                                                                              |                                                                                                                                                                                                                                                                                                                                                                                                                                                                                                                | 1.94E-03 | 54 |
|                                                                                                                                                           |  | APLP2,ATIC,BCL6,C10A,CCL14,CCL24,CD36,CD83,CHST8,CXCL1,CXCL2,DDP4,EDN1,EGFL8,FCGR2B,FDPS,GNB2,GSR,HLA-DOA,HLA-DOB1,HLA-DRB1,HLA-E,HNRNP1A,IL4,LDBL,LMO4,MMP2,MRC1,NGFR,NOTCH4,PPP1R7,PSMB8,RNF39,RPL11,RPS24,RPS3,RPS4,S100A10,SCML1,SELE,SLC1A7,STAT6,TGFBI,TLR9,TNFRSF10A,TP53,TRAF1,TRIM2,TRIM3,TUBA1C,TUBB3,VIPR1,ZFP36                                              |                                                                                                                                                                                                                                                                                                                                                                                                                                                                                                                |          |    |
| Connective Tissue Disorders, Inflammatory Disease, Skeletal and Muscular Disorders                                                                        |  | arthritis                                                                                                                                                                                                                                                                                                                                                                |                                                                                                                                                                                                                                                                                                                                                                                                                                                                                                                | 2.07E-03 | 53 |
|                                                                                                                                                           |  | BECN1,FASLG,FHIT,FS1,GNA11,HSF1,INVS,MCRS1,NAPA,PCDH11,YPP1R10,PPP2R2A,PRPF19,RICTOR,RNF144B,RNF34,RPS24,TGFBI,TP53,TP73,UCLH1                                                                                                                                                                                                                                           |                                                                                                                                                                                                                                                                                                                                                                                                                                                                                                                |          |    |
| Cell Death and Survival                                                                                                                                   |  | apoptosis of cervical cancer cell lines                                                                                                                                                                                                                                                                                                                                  |                                                                                                                                                                                                                                                                                                                                                                                                                                                                                                                | 2.09E-03 | 21 |

|                                                                                                                                                                                                      |                                                                |          |                                                                                                                                                                                                                                                                                                                                            |    |
|------------------------------------------------------------------------------------------------------------------------------------------------------------------------------------------------------|----------------------------------------------------------------|----------|--------------------------------------------------------------------------------------------------------------------------------------------------------------------------------------------------------------------------------------------------------------------------------------------------------------------------------------------|----|
| Cell Death and Survival                                                                                                                                                                              | apoptosis of phagocytes                                        | 2.27E-03 | CXCL1,FASLG,FCER1A,IL4,LEP,TGFB1,TLR9,TP53                                                                                                                                                                                                                                                                                                 | 8  |
| Cell-To-Cell Signaling and Interaction, Tissue Development                                                                                                                                           | adhesion of tumor cell lines                                   | 2.36E-03 | ARHGFB1,BAGALNT2,BAGALT1,EMP7,CDCP1,CXCL2,DKK3,FAM188A,FUT9,LEP,LTBR,MMP2,NEU3,PTX2,RPSA,SELE,SKAP1,TGFB1,UCHL1                                                                                                                                                                                                                            | 19 |
| Cancer                                                                                                                                                                                               | Ewing's sarcoma                                                | 2.44E-03 | FDPS,FLI1,TP53,TUBA1C,TUBB3                                                                                                                                                                                                                                                                                                                | 6  |
| Lipid Metabolism, Small Molecule Biochemistry, Vitamin and Mineral Metabolism                                                                                                                        | steroid metabolism                                             | 2.58E-03 | APOB,BMP7,DKK3,GBA2,IL4,LCAT,NPC1,NR0B2,SULT2B1,TP53,WVVOX                                                                                                                                                                                                                                                                                 | 11 |
| Cellular Movement                                                                                                                                                                                    | chemotaxis                                                     | 2.60E-03 | APLN,R,C4A/C4B,CCL14,CCL24,CCL27,CCR8,CD36,CSF2RA,CXCL1,CXCL2,DP4,FASLG,GN111,LL,LGALS9,MMP2,NEDD4,PLA2G1B,RICTOR,SELE,TGFB1,USP14,VIPR1                                                                                                                                                                                                   | 23 |
| Cancer                                                                                                                                                                                               | head and neck cancer                                           | 2.61E-03 | AKAP1,ATIC,BAI3,CD83,CDKN3,CSF7,CXCL1,CXCL2,EY4,FBLN2,FHIT,FOXG1,GALNT3,GATA6,CNA11,GSR,HRK,ITGBL1,KLRCL1,LOXL2,LTBR,MAP7,MMP2,MRC1,MYO3B,NUDT11,PTCH2,RAPGEF4,RFN20,SEMA4D,SPRY1,STAT8,STAT5B,TACSTD2,TAI1,TGFB1,THY1,TLK2,TOPI1,TP53,TP73,TRAP1,TUBA1C,TUBB3,UCHL1                                                                       | 45 |
| Cell Cycle                                                                                                                                                                                           | ploidy of tumor cell lines                                     | 2.68E-03 | FBXO5,GATA6,MCRS1,SPRY2,TP53                                                                                                                                                                                                                                                                                                               | 5  |
| Gastrointestinal Disease, Hematological Disease, Immunological Disease, Inflammatory Disease                                                                                                         | eosinophilia of esophagus                                      | 2.75E-03 | CCL24,CCR8,FCER1A,IL4                                                                                                                                                                                                                                                                                                                      | 4  |
| Cell-To-Cell Signaling and Interaction                                                                                                                                                               | activation of cells                                            | 2.78E-03 | BCL2A1,DDOST,DP4,DUSP3,EDN1,ENTPD1,FASLG,FCER1G,IL4,IQGAP1,KIR2DS4 (includes others),KIR3DL1,LGR4,LTBR,MMP2,NCK1,PPP1R1A,PRG3,RAB35,SEMA4D,TGFB1,TLR9,TNFRSF10A,TP53,TP73                                                                                                                                                                  | 25 |
| Cellular Movement, Hematological System Development and Function, Immune Cell Trafficking, Inflammatory Response                                                                                     | chemotaxis of granulocytes                                     | 2.81E-03 | CCL14,CCL24,CSF2RA,CXCL1,CXCL2,FASLG,LGALS9,PLA2G1B,SELE,TGFB1                                                                                                                                                                                                                                                                             | 10 |
| Cellular Movement                                                                                                                                                                                    | chemotaxis of cells                                            | 2.92E-03 | APLN,R,C4A/C4B,CCL14,CCL24,CCL27,CCR8,CD36,CSF2RA,CXCL1,CXCL2,DP4,FASLG,GN111,LL,LGALS9,MMP2,NEDD4,PLA2G1B,RICTOR,SELE,TGFB1,VIPR1                                                                                                                                                                                                         | 22 |
| Cardiovascular Disease                                                                                                                                                                               | peripheral arterial occlusive disease                          | 2.96E-03 | ADAR,BAG3,CD36,CD83,CPIVL,CTSA,GLRX,HLA-DRB1,LPXN,NR2F2,PDE4DIP,PTGER3,RLP9,RUVBL2,SLC22A3,SSX2IP,THY1                                                                                                                                                                                                                                     | 17 |
| Gene Expression                                                                                                                                                                                      | repression of RNA                                              | 2.97E-03 | BCL6,FOXG1,MCRS1,NR2F2,RBBP8,RUVBL2,TAI1,TP53,ZNF107                                                                                                                                                                                                                                                                                       | 9  |
| Cancer, Dermatological Diseases and Conditions, Hematological Disease, Immunological Disease                                                                                                         | ALK-negative anaplastic large cell lymphoma                    | 3.12E-03 | HDAC6,PSMB2,PSMB5,PSMD1,TP53                                                                                                                                                                                                                                                                                                               | 5  |
| Organismal Injury and Abnormalities                                                                                                                                                                  | cell death of blood cells                                      | 3.16E-03 | APOB,BCL6,CCR8,CSF2RA,CXCL1,FASLG,FCER1A,FLI1,HRK,IL4,LEP,LGALS9,MYBL2,NFKB2,SEMA4D,STAT5B,TGFB1,TLR9,TNFRSF8,TP53                                                                                                                                                                                                                         | 20 |
| Cell Death and Survival                                                                                                                                                                              | oral cavity carcinoma                                          | 3.33E-03 | CD83,CXCL1,CXCL2,GATA6,ITGBL1,MAP7,MYO3B,NUDT11,SEMA4D,SPRY1,TACSTD2,TGFB1,TP53,TUBA1C,TUBB3                                                                                                                                                                                                                                               | 15 |
| Cancer, Gastrointestinal Disease                                                                                                                                                                     | accumulation of carcinoma cell lines                           | 3.37E-03 | FHIT                                                                                                                                                                                                                                                                                                                                       | 2  |
| Tissue Development                                                                                                                                                                                   | alcoholic cirrhosis                                            | 3.37E-03 | FASLG,TGFB1                                                                                                                                                                                                                                                                                                                                | 2  |
| Gastrointestinal Disease, Hepatic System Disease, Organismal Injury and Abnormalities                                                                                                                | arrest in G0/G1 phase transition of cervical cancer cell lines | 3.37E-03 | PITX2,TGFB1                                                                                                                                                                                                                                                                                                                                | 2  |
| Cell Cycle                                                                                                                                                                                           | class switching of B lymphocytes                               | 3.37E-03 | IL4,TGFB1                                                                                                                                                                                                                                                                                                                                  | 2  |
| Hematological System Development and Function, Humoral Immune Response                                                                                                                               | complement component C1q deficiency                            | 3.37E-03 | C1QA,C1QC                                                                                                                                                                                                                                                                                                                                  | 2  |
| Developmental Disorder, Hereditary Disorder, Immunological Disease                                                                                                                                   | cytostasis of fibroblast cell lines                            | 3.37E-03 | TBC1D3 (includes others),TP53                                                                                                                                                                                                                                                                                                              | 2  |
| Cellular Growth and Proliferation, Connective Tissue Development and Function                                                                                                                        | depletion of cholesterol                                       | 3.37E-03 | LDLR,SCARB1                                                                                                                                                                                                                                                                                                                                | 2  |
| Lipid Metabolism, Molecular Transport, Small Molecule Biochemistry                                                                                                                                   | inactivation of mast cells                                     | 3.37E-03 | FCER1A,FCGR2B                                                                                                                                                                                                                                                                                                                              | 2  |
| Cellular Development, Hematological System Development and Function, Hypersensitivity Response                                                                                                       | lifespan of B lymphocytes                                      | 3.37E-03 | BCL6,SEMA4D                                                                                                                                                                                                                                                                                                                                | 2  |
| Cell Death and Survival, Cellular Development, Hematological System Development and Function                                                                                                         | senescence of fibrosarcoma cell lines                          | 3.37E-03 | MCRS1,TP53                                                                                                                                                                                                                                                                                                                                 | 2  |
| Cell Cycle                                                                                                                                                                                           | synthesis of chondroitin sulfate B                             | 3.37E-03 | B4GALNT1,CHST12                                                                                                                                                                                                                                                                                                                            | 2  |
| Biochemistry, Tissue Development                                                                                                                                                                     | catabolism of RNA                                              | 3.39E-03 | PPP1R18,RNASE6,SUPV3L1,ZFP36                                                                                                                                                                                                                                                                                                               | 4  |
| RNA Damage and Repair                                                                                                                                                                                | function of lymphocytes                                        | 3.39E-03 | DLG1,HLA-E,LEP,TGFB1                                                                                                                                                                                                                                                                                                                       | 2  |
| Cellular Function and Maintenance, Hematological System Development and Function                                                                                                                     | cell death of hematopoietic cells                              | 3.51E-03 | CSF2RA,FASLG,FLI1,HRK,TGFB1,TP53                                                                                                                                                                                                                                                                                                           | 6  |
| Lipid Metabolism, Molecular Transport, Small Molecule Biochemistry                                                                                                                                   | quantity of glycosphingolipid                                  | 3.51E-03 | B4GALNT1,IL4,NEU3,NGFR,SCARB1,SGPP1                                                                                                                                                                                                                                                                                                        | 6  |
| Cell-To-Cell Signaling and Interaction, Hematological System Development and Function, Immune Cell Trafficking, Inflammatory Response                                                                | activation of lymphocytes                                      | 3.51E-03 | DDOST,DP4,DUSP3,FASLG,FCER1G,IL4,KIR3DL1,NCK1,SEMA4D,TGFB1,TLR9,TP53                                                                                                                                                                                                                                                                       | 12 |
| Cell Death and Survival                                                                                                                                                                              | cell viability                                                 | 3.66E-03 | APOB,B4GALT5,BCL2A1,BCL6,BECN1,BIRC6,BMP7,CDK11A,CRBN,DPP4,DUSP6,EIF3C,FASLG,FBXO5,FHIT,GATA6,IL4,LEP,MPG,MYBL2,NEK3,NEK9,NFKB2,NGFR,NTSC3A,PPP1R12B,PPP1R19B,PPP2R2A,PRPF19,PSM3,RAPGEF4,RHO,RICTOR,RPSA,SEMA4D,SF3A1,SGPP1,SLC22A3,SNRPD1,SULT2B1,SUPT5H,TFEB,TGFB1,TP53,TP73,TUBB3,USP14,WVVOX,ZFP36,ZNF208                             | 53 |
| Lipid Metabolism, Molecular Transport, Small Molecule Biochemistry                                                                                                                                   | release of eicosanoid                                          | 3.70E-03 | FCER1G,IL4,LEP,PLA2G1B,PLA2G2D,PRG3,S100A10                                                                                                                                                                                                                                                                                                | 7  |
| Cellular Movement, Hematological System Development and Function, Immune Cell Trafficking                                                                                                            | cell movement of granulocytes                                  | 3.71E-03 | CCL14,CCL24,CSF2RA,CXCL1,CXCL2,FASLG,IL4,LEP,LGALS9,PLA2G1B,SELE,TGFB1                                                                                                                                                                                                                                                                     | 12 |
| Cancer                                                                                                                                                                                               | malignant neoplasm of aerodigestive tract                      | 3.84E-03 | AKAP1,ATIC,BAI3,BRINP3,CD83,CTSB,CXCL1,CXCL2,FBLN2,FHIT,FZD4,GATA6,ITGBL1,LTBR,MAP7,MMP2,MYO3B,NGFR,NUDT11,PPP1R10,SEMA4D,SPRY1,TACSTD2,TGFB1,THY1,TOPI1,TP53                                                                                                                                                                              | 12 |
| Lipid Metabolism, Molecular Transport, Small Molecule Biochemistry                                                                                                                                   | processing of polysaccharide                                   | 3.91E-03 | TUBA1C,TUBB3,UCHL1,WVVOX,ZNF345                                                                                                                                                                                                                                                                                                            | 32 |
| Lipid Metabolism, Molecular Transport, Small Molecule Biochemistry                                                                                                                                   | release of leukotriene C4                                      | 3.91E-03 | POPDC1,STSB2,STSB3A3                                                                                                                                                                                                                                                                                                                       | 3  |
| Digestive System Development and Function, Gastrointestinal Disease, Hepatic System Development and Function, Hepatic System Disease, Inflammatory Disease, Inflammatory Response, Organ Development | inflammation of liver                                          | 3.93E-03 | FCER1G,IL4,PRG3                                                                                                                                                                                                                                                                                                                            | 3  |
| Gene Expression                                                                                                                                                                                      | activation of DNA endogenous promoter                          | 3.98E-03 | APOB,C4A/C4B,CXCL1,CXCL2,FCGR2B,GPT,IL10RB,IL4,LEP,LGALS9,TGFB1,TP73                                                                                                                                                                                                                                                                       | 12 |
| Cancer, Dermatological Diseases and Conditions                                                                                                                                                       | skin carcinoma                                                 | 4.00E-03 | BCL11B,BCL6,C8FB,EDN1,FASLG,FST,GATA6,GMEB2,GREM1,GTFA21A,HEY2,HSF1,HTATS1,KMT2A,LRRFP1,MED20,NCK1,NR2F2,PITX2,PLA2G1B,RBBP8,SHOX,SKAP1,SOX30,STAT5B,STAT6,SUPT5H,TAI1,TFEB,TGFB1,TP53,TP73,ZKX2,ZNF141,ZNF202,ZNF345,ZNF366,ZNF367,ZNF76                                                                                                  | 39 |
| Cell Cycle                                                                                                                                                                                           | G1 phase of carcinoma cell lines                               | 4.13E-03 | CCL27,EDN1,LGR4,NTRK3,PTCH2,STAT5B,TNFRSF10A,TOPI1,TP53                                                                                                                                                                                                                                                                                    | 9  |
| Immunological Disease                                                                                                                                                                                | Wiskott-Aldrich syndrome                                       | 4.13E-03 | BAP1,FAM188A,RFFL,TP53                                                                                                                                                                                                                                                                                                                     | 4  |
| Lipid Metabolism, Small Molecule Biochemistry                                                                                                                                                        | metabolism of eicosanoid                                       | 4.15E-03 | ADAR,C4A/C4B,FCGR2B,OAS1                                                                                                                                                                                                                                                                                                                   | 4  |
| Cell Cycle                                                                                                                                                                                           | G1 phase of lung cancer cell lines                             | 4.18E-03 | CD83,CXCL1,EDN1,EDNRA,FCER1G,GPX4,IL4,MGST2,PLA2G1B,PLA2G2D,PRG3,TP53                                                                                                                                                                                                                                                                      | 12 |
| Cell Death and Survival                                                                                                                                                                              | apoptosis of smooth muscle cells                               | 4.18E-03 | BAP1,FAM188A,PKS1,RFFL,TP53                                                                                                                                                                                                                                                                                                                | 5  |
| Cellular Movement, Hematological System Development and Function, Immune Cell Trafficking, Inflammatory Response                                                                                     | cell survival                                                  | 4.29E-03 | AGTR2,EDN1,FASLG,GATA6,TP53                                                                                                                                                                                                                                                                                                                | 5  |
| Molecular Transport                                                                                                                                                                                  | quantity of metal                                              | 4.33E-03 | APOB,B4GALT5,BCL2A1,BCL6,BECN1,BIRC6,BMP7,CDK11A,CRBN,DPP4,DUSP6,EIF3C,FASLG,FBXO5,FHIT,GATA6,IL4,LEP,MPG,MYBL2,NCK1,NEK3,NEK9,NFKB2,NGFR,NTSC3A,NTRK3,PPP1R12B,PPP1R19B,PPP2R2A,PRPF19,PSM3,RAPGEF4,RHO,RICTOR,RPSA,SEMA4D,SF3A1,SGPP1,SLC22A3,SNRPD1,SULT2B1,SUPT5H,TFEB,TGFB1,TP53,TP73,TUBB3,USP14,WVVOX,ZFP36,ZNF208                  | 55 |
| Connective Tissue Disorders, Inflammatory Disease, Skeletal and Muscular Disorders                                                                                                                   | Rheumatic Disease                                              | 4.38E-03 | AKAP1,APLP2,CCKBR,CCL24,CCR8,EDN1,EDNRA,ENTPD1,ENTPD2,GN111,LL,IL4,LGR4,NMUR1,PLC1,SELE,TGFB1,TP73                                                                                                                                                                                                                                         | 8  |
| Cell Death and Survival                                                                                                                                                                              | apoptosis of fibrosarcoma cell lines                           | 4.40E-03 | APLP2,ATIC,BCL6,C1QA,CCL14,CCL24,CD36,CD83,CHST8,CTSA,CXCL1,CXCL2,DP4,DRD3,EDN1,EDNRA,EGF8,FCGR2B,FDPS,GNB2,GSR,HLA-DOA,HLA-DOB1,HLA-DRB1,HLA-E,HNRNP1A,IL4,LDHB,LMOD1,M6PR,MMP2,MRC1,NGFR,NOTCH4,PPP1R7,PSMB8,RFN39,RLP11,RPS24,TP53,TRAF1,SELE,S100A17,STAT6,TGFB1,TLR9,TNFRSF10A,TP53,TRAF1,TRIM26,TRIM31,TUBA1C,TUBB3,VIPR1,XKR6,ZFP36 | 57 |
| Cell Death and Survival                                                                                                                                                                              | production of HIV-1                                            | 4.75E-03 | BCL2A1,FASLG,MCRS1,NFKB2,TP53,TRAF1                                                                                                                                                                                                                                                                                                        | 6  |
| Infectious Disease                                                                                                                                                                                   | cell death of cervical cancer cell lines                       | 4.79E-03 | APOB,BCL2A1,BECN1,FASLG,FHIT,FST,GN111,HSF1,INVS,MCRS1,NAPA,PCDH11Y,PPP1R10,PPP2R2A,PRPF19,RICTOR,RFN14B,RFN34,RPS24,TGFB1,TNFRSF10A,TP53,TP73,UCHL1                                                                                                                                                                                       | 24 |
| Neurological Disease                                                                                                                                                                                 | progressive motor neuropathy                                   | 4.81E-03 | LCP2,STAT5B,TAT,TLR9,TRIM22                                                                                                                                                                                                                                                                                                                | 5  |
| Cellular Movement, Hematological System Development and Function, Immune Cell Trafficking, Inflammatory Response                                                                                     | chemotaxis of neutrophils                                      | 4.89E-03 | ACTN3,BECN1,C4A/C4B,CHAT,COLGALT2,CXCL1,DLG2,DRD3,FCGR2B,FHIT,GALNT3,GATM,HLA-DOB1,HLA-DRB1,HLA-E,HNRNP1A,HRK,IL4,LDHB,LMOD1,M6PR,NEDD4,NGFR,NOTCH4,OAS1,PPP1R1A,SLC1A7,THY1,TP53,TRIM31,TUBA1C,UCHL1,ZFP36L1                                                                                                                              | 33 |
| Cell-To-Cell Signaling and Interaction, Cellular Compromise, Cellular Function and Maintenance, Inflammatory Response                                                                                | respiratory burst of phagocytes                                | 4.96E-03 | CCL24,CSF2RA,CXCL1,CXCL2,FASLG,PLA2G1B,SELE,TGFB1                                                                                                                                                                                                                                                                                          | 8  |
| Cellular Response to Therapeutics                                                                                                                                                                    | sensitivity of cells                                           | 4.96E-03 | CXCL1,FCER1A,IL4,TGFB1                                                                                                                                                                                                                                                                                                                     | 4  |
| Inflammatory Response                                                                                                                                                                                | inflammation of organ                                          | 5.20E-03 | MPG,MYBL2,TOPI1,TP53                                                                                                                                                                                                                                                                                                                       | 4  |
| Cancer, Neurological Disease                                                                                                                                                                         | recurrent malignant glioma                                     | 5.24E-03 | APOB,BCL11B,C4A/C4B,CCL27,CPIVL,CSF2RA,CXCL1,CXCL2,DP4,EDN1,EDNRA,FCER1A,FCER1G,FCGR2B,GPT,GSR,HDAC6,HLA-DRB1,IDI1,IL10RB,IL4,LEP,LGALS9,NAPA,NRG4,PSMB2,PSMB5,PSMD1,SELE,TGFB1,TGM6,TLR9                                                                                                                                                  | 40 |
| Cell-To-Cell Signaling and Interaction                                                                                                                                                               | response of breast cancer cell lines                           | 5.24E-03 | GSR,TOPI1,TP53                                                                                                                                                                                                                                                                                                                             | 3  |
| Cellular Response to Therapeutics                                                                                                                                                                    | sensitivity of tumor cell lines                                | 5.24E-03 | MPG,TGFB1,TP53                                                                                                                                                                                                                                                                                                                             | 3  |
|                                                                                                                                                                                                      |                                                                | 5.24E-03 | MPG,TOPI1,TP53                                                                                                                                                                                                                                                                                                                             | 3  |

|                                                                                                                                                                                |                                                            |                                                                                                                                                                                                                 |          |     |
|--------------------------------------------------------------------------------------------------------------------------------------------------------------------------------|------------------------------------------------------------|-----------------------------------------------------------------------------------------------------------------------------------------------------------------------------------------------------------------|----------|-----|
| Cell Cycle                                                                                                                                                                     | mitosis                                                    | BMP7, DLG1, DRD3, EDN1, FBXO5, FLI1, IL4, INVS, KPNB1, LEP, MAP9, MASTL, NAE1, PCDH11Y, PHF13,                                                                                                                  | 5.33E-03 | 21  |
| Cancer, Dermatological Diseases and Conditions                                                                                                                                 | basal-cell carcinoma                                       | RBBP9, RPS24, SPRY2, STL1, TGFBI, TP53                                                                                                                                                                          | 5.38E-03 | 7   |
| Cell Death and Survival                                                                                                                                                        | cell death of muscle cells                                 | CCL27, EDN1, NTRK3, PTC2, STAT5B, TNFRSF10A, TP53                                                                                                                                                               | 5.38E-03 | 7   |
| Cell Death and Survival                                                                                                                                                        | cell viability of mononuclear leukocytes                   | AGTR2, EDN1, FASLG, GATA6, TGFBI, TNFRSF10A, TP53                                                                                                                                                               | 5.45E-03 | 6   |
| Lipid Metabolism, Small Molecule Biochemistry                                                                                                                                  | synthesis of leukotriene                                   | AP0B, BCL6, IL4, MYBL2, SEMA4D, TGFBI                                                                                                                                                                           | 5.46E-03 | 5   |
| Cancer, Hematological Disease, Immunological Disease                                                                                                                           | multiple myeloma                                           | FCER1G, IL4, MGST2, PLA2G1B, PRG3                                                                                                                                                                               | 5.64E-03 | 13  |
| Cell Cycle                                                                                                                                                                     | mitosis of tumor cell lines                                | BRINP3, CRBN, CSMD1, CXCL1, FDXP, GSR, HS6S23, LCP2, MMP2, PSMB2, PSMB5, PSMD1, TP53                                                                                                                            | 5.66E-03 | 11  |
| Lipid Metabolism, Small Molecule Biochemistry                                                                                                                                  | synthesis of eicosanoid                                    | BMP7, FBXO5, FLI1, INVS, MASTL, NAE1, PCDH11Y, RBBP9, RPS24, STL1, TP53                                                                                                                                         | 5.66E-03 | 8   |
| Cell Death and Survival                                                                                                                                                        | apoptosis of epithelial cells                              | CD83, CXCL1, EDN1, EDNRA, FCER1G, IL4, MGST2, PLA2G1B, PLA2G2D, PRG3, TP53                                                                                                                                      | 5.70E-03 | 11  |
| Immunological Disease                                                                                                                                                          | immunodeficiency                                           | ASA2, BCL2A1, FASLG, IL4, STAT5, TGFBI, TNFRSF10A, TP53                                                                                                                                                         | 5.73E-03 | 7   |
|                                                                                                                                                                                |                                                            | ADAR, AK2, C10A, C10C, C4A, C4B, FASLG, FCGR2B, IL4, INFKR, NHEJ1, OAS1, PLOC2, STAT5B, TTC3                                                                                                                    | 5.73E-03 | 14  |
|                                                                                                                                                                                |                                                            | ALA, ALA, ALURK, ALUFP1, ALU1, F2C, F2Z, ARF, AP1, LINA, ARHGEF1, B3BP1, I, SBR4DL1, /, BCAF9, BRP1, BCL11B, BCL2, A1, BCL6, BCLCN1, BIRC5, BMP7, BRP1, BRINP3, C1GALT1C1, CCKBR, CCL14, CCL24, CD38, CD83, CDC |          |     |
|                                                                                                                                                                                |                                                            | P1, CDKN3, CNOT8, CSF2RA, CTBP2, CUL7, CXCL1, CXCL2, DHH, DKK3, DLG1, DPP4, DUSP4, DUSP6, E                                                                                                                     |          |     |
|                                                                                                                                                                                |                                                            | DN1, EIF3C, ENPP1, ENTDP1, FAM188A, FASLG, FBLN2, FCER1A, FHIT, FLI1, FOXG1, FST, GATA6, GDF9                                                                                                                   |          |     |
|                                                                                                                                                                                |                                                            | , GLMN, GPX4, GREM1, HABP2, HDAC6, HGFAC, HLA-                                                                                                                                                                  |          |     |
|                                                                                                                                                                                |                                                            | DRB1, HHRNP4, HSF1, ICAM3, IL4, IQGAP1, KIR2DS4 (includes                                                                                                                                                       |          |     |
|                                                                                                                                                                                |                                                            | others), KMT2A, LEP, LGALS9, LTRB, MCM3, MCRS1, MGAT1, MMP2, MYBL2, NAA10, NCK1, NEURL1, NF                                                                                                                     |          |     |
|                                                                                                                                                                                |                                                            | KB2, NGFR, NOTCH4, NR2F2, NRG4, NTSC3A, NTHL1, NTRK3, PLCE1, PLOC2, PLS3, PPP1CC, PPP1R1                                                                                                                        |          |     |
|                                                                                                                                                                                |                                                            | 0, PRPF19, PSMB2, PSMD3, RBMY1A1 (includes                                                                                                                                                                      |          |     |
|                                                                                                                                                                                |                                                            | others), RICTOR, RNF111, RNF20, RPSA, S100A10, SCARB1, SF3B2, SPRY2, STAT5B, STL1, SUPV3L1, T                                                                                                                   |          |     |
|                                                                                                                                                                                |                                                            | ACSTD2, TBC1D3 (includes                                                                                                                                                                                        |          |     |
|                                                                                                                                                                                |                                                            | others), TGFBI, TJP3, TLR9, TNFRSF10A, TNFSF8, TOB1, TOP1, TP53, TP73, TRRAP, TSC22D3, TUBB3,                                                                                                                   |          |     |
| Cellular Growth and Proliferation                                                                                                                                              | proliferation of cells                                     | UBC, UCHL1, USP1, UTP20, VIPR1, VPS28, WWOX, ZFP36                                                                                                                                                              | 5.83E-03 | 128 |
| Molecular Transport                                                                                                                                                            | quantity of metal ion                                      | AKAP1, CCKBR, CCL24, CCR8, EDN1, EDNRA, ENTDP1, ENTDP2, GNA11, IL4, LGR4, NMUR1, PLCL1, SE                                                                                                                      | 5.87E-03 | 16  |
| Immunological Disease, Inflammatory Response, Organismal Injury and Abnormalities, Renal and Urological Disease                                                                | IgA nephropathy                                            | LE, TGFBI, TP73                                                                                                                                                                                                 | 5.91E-03 | 4   |
| Post-Translational Modification                                                                                                                                                | autoubiquitination of protein                              | ERIC3, LRSAM1, TRIM13, TRIM17                                                                                                                                                                                   | 5.91E-03 | 4   |
| Cell-To-Cell Signaling and Interaction, Hematological System Development and Function, Immune Cell Trafficking, Inflammatory Response                                          | activation of leukocytes                                   | DDOST, DPP4, DUSP3, EDN1, FASLG, FCER1G, IL4, KIR3DL1, LTRB, NCK1, PRG3, RAB35, SEMA4D, TG                                                                                                                      | 5.95E-03 | 17  |
| Cell-To-Cell Signaling and Interaction, Hematological System Development and Function                                                                                          | activation of blood cells                                  | FB1, TLR9, TNFRSF10A, TP53                                                                                                                                                                                      | 5.95E-03 | 17  |
| Cancer, Hematological Disease, Immunological Disease, Organismal Injury and Abnormalities                                                                                      | peripheral T-cell lymphoma                                 | DDOST, DPP4, DUSP3, EDN1, ENTDP1, FASLG, FCER1G, IL4, KIR3DL1, LTRB, NCK1, PRG3, RAB35, SE                                                                                                                      | 5.96E-03 | 18  |
| Cancer, Gastrointestinal Disease                                                                                                                                               | oral cancer                                                | M44D, TGFBI, TLR9, TNFRSF10A, TP53                                                                                                                                                                              | 6.04E-03 | 6   |
|                                                                                                                                                                                |                                                            | HDAC6, PSMB2, PSMB5, PSMD1, TP53, TUBB3                                                                                                                                                                         | 6.04E-03 | 17  |
|                                                                                                                                                                                |                                                            | AKAP1, ATIC, CD83, CXCL1, CXCL2, GATA6, ITGBL1, MAP7, MYO3B, NUDT11, SEMA4D, SPRY1, TACST                                                                                                                       | 6.42E-03 | 17  |
|                                                                                                                                                                                |                                                            | D2, TGFBI, TP53, TUBA1C, TUBB3                                                                                                                                                                                  | 6.42E-03 | 17  |
|                                                                                                                                                                                |                                                            | AGGF1, APLNR, ARHGEF4, BCL11B, BMP7, BRINP3, C14orf45, CCL14, COL4A, COL27, CCR8, CD38, CD                                                                                                                      |          |     |
|                                                                                                                                                                                |                                                            | CPI, CHST2, CSF2RA, CTBP2, CXCL1, CXCL2, DKK3, DPP4, EDN1, EFNA5, FAM188A, FASLG, FBLN2, F                                                                                                                      |          |     |
|                                                                                                                                                                                |                                                            | UT9, GATA6, GNA11, IL4, IQGAP1, KMT2A, LEP, LGALS9, MMP2, NCK1, NEDD4, NEU3, NFKB2, NOTCH4,                                                                                                                     |          |     |
|                                                                                                                                                                                |                                                            | NTRK3, PDE4DIP, PITX2, PLA2G1B, PLCL1, RAP1A, RICTOR, RNF20, RUVBL2, S100A10, SCARB1, SELE                                                                                                                      |          |     |
|                                                                                                                                                                                |                                                            | , SEMA4D, SGPP1, SPRY2, TACSTD2, TGFBI, THY1, TP53, TP73, TP63, TSC22D3, TUBA1C, USP14, VIP                                                                                                                     |          |     |
| Cellular Movement                                                                                                                                                              | cell movement                                              | R1, VPS28, WWOX                                                                                                                                                                                                 | 6.42E-03 | 66  |
|                                                                                                                                                                                |                                                            | AADAT, ADAR, APOB, BAG5, BCL6, CD38, CD83, CDCP1, CPVL, CSMD1, CTSA, DLG2, DRD3, EDN1, EDN                                                                                                                      |          |     |
|                                                                                                                                                                                |                                                            | RA, ENP1, FUT9, GATA6, GLRX, HABP2, HLA-                                                                                                                                                                        |          |     |
|                                                                                                                                                                                |                                                            | DRB1, IL4, LDLR, LPXN, MMP2, MYO3B, NPR1, NR2F2, PDE4DIP, PTGER3, RPL9, RUVBL2, SCARB1, SEL                                                                                                                     |          |     |
|                                                                                                                                                                                |                                                            | E, SLC22A3, SSX2IP, SUPV3L1, TGFBI, THY1, TLR9, TUBA1C, TUBB3, UTP20, WWOX, ZFP36                                                                                                                               | 6.46E-03 | 45  |
| Cardiovascular Disease                                                                                                                                                         | vascular disease                                           |                                                                                                                                                                                                                 | 6.46E-03 | 45  |
| Cell Death and Survival                                                                                                                                                        | apoptosis of blood cells                                   | CCR8, CSF2RA, CXCL1, FASLG, FCER1A, FLI1, IL4, LEP, LGALS9, NFKB2, STAT5B, TGFBI, TLR9, TP53                                                                                                                    | 6.55E-03 | 14  |
| Cell Death and Survival                                                                                                                                                        | apoptosis of spleen cell lines                             | FASLG, TGFBI                                                                                                                                                                                                    | 6.55E-03 | 2   |
| Cell Cycle                                                                                                                                                                     | arrest in G0/G1 phase transition of lung cancer cell lines | FHIT, TP53                                                                                                                                                                                                      | 6.59E-03 | 2   |
| Cellular Development, Cellular Growth and Proliferation                                                                                                                        | arrest in growth of bladder cancer cell lines              | TP53, TP73                                                                                                                                                                                                      | 6.59E-03 | 2   |
| Cell Cycle                                                                                                                                                                     | arrest in interphase of stomach cancer cell lines          | TGFBI, TP53                                                                                                                                                                                                     | 6.59E-03 | 2   |
| Cancer, Neurological Disease                                                                                                                                                   | brainstem glioma                                           | GSR, TP53                                                                                                                                                                                                       | 6.59E-03 | 2   |
| Cellular Movement, Embryonic Development                                                                                                                                       | cell rolling of embryonic cell lines                       | FUT9, SELE                                                                                                                                                                                                      | 6.59E-03 | 2   |
| Cellular Movement, Hair and Skin Development and Function                                                                                                                      | cell rolling of epithelial cell lines                      | FUT9, SELE                                                                                                                                                                                                      | 6.59E-03 | 2   |
| Cell Death and Survival, Cellular Function and Maintenance                                                                                                                     | colony survival of lung cancer cell lines                  | TP53, TUBB3                                                                                                                                                                                                     | 6.59E-03 | 2   |
| Cardiovascular System Development and Function, Tissue Morphology                                                                                                              | contraction of umbilical vein                              | IL4, TGFBI                                                                                                                                                                                                      | 6.59E-03 | 2   |
| Cell-To-Cell Signaling and Interaction, Tissue Development                                                                                                                     | dissociation of cells                                      | CCKBR, NPR1                                                                                                                                                                                                     | 6.59E-03 | 2   |
| Cellular Development, Cellular Growth and Proliferation, Hematological System Development and Function                                                                         | epithelial-mesenchymal transition of kidney cell lines     | BMP7, TGFBI                                                                                                                                                                                                     | 6.59E-03 | 2   |
| Function                                                                                                                                                                       | expansion of regulatory T lymphocytes                      |                                                                                                                                                                                                                 | 6.59E-03 | 2   |
| Endocrine System Development and Function                                                                                                                                      | insulin sensitivity                                        | LGALS9, TGFBI                                                                                                                                                                                                   | 6.59E-03 | 2   |
| Cancer, Gastrointestinal Disease                                                                                                                                               | metastatic colon carcinoma                                 | LEP, SCARB1                                                                                                                                                                                                     | 6.59E-03 | 2   |
| Cell Morphology                                                                                                                                                                | morphology of prostate cell lines                          | FASLG, LGR4                                                                                                                                                                                                     | 6.59E-03 | 2   |
| Cell Cycle, Cellular Development, Connective Tissue Development and Function                                                                                                   | premature senescence of fibroblasts                        | GALNT3, TGFBI                                                                                                                                                                                                   | 6.59E-03 | 2   |
| Cellular Development, Cellular Growth and Proliferation, Hematological System Development and Function, Hematopoiesis, Inflammatory Response                                   | proliferation of colony-forming granulocyte-macrophages    | MYBL2, TP53                                                                                                                                                                                                     | 6.59E-03 | 2   |
| Endocrine System Development and Function, Tissue Morphology                                                                                                                   | quantity of endocrine cells                                |                                                                                                                                                                                                                 | 6.59E-03 | 2   |
| Cell Signaling                                                                                                                                                                 | transduction of protein                                    | CXCL2, TGFBI                                                                                                                                                                                                    | 6.59E-03 | 2   |
| Cancer                                                                                                                                                                         | transformation of blood cells                              | FST, NRG4                                                                                                                                                                                                       | 6.59E-03 | 2   |
| Infectious Disease                                                                                                                                                             | transmission of HIV-1                                      | IL10RB, PLOC2                                                                                                                                                                                                   | 6.59E-03 | 2   |
| Drug Metabolism, Lipid Metabolism, Small Molecule Biochemistry                                                                                                                 | synthesis of prostaglandin E2                              | KMT2A, LGALS9                                                                                                                                                                                                   | 6.59E-03 | 2   |
| Cell Signaling                                                                                                                                                                 | activation of enzyme                                       | CD36, LCP2                                                                                                                                                                                                      | 6.61E-03 | 8   |
|                                                                                                                                                                                |                                                            | CD83, CXCL1, EDN1, EDNRA, FCER1G, IL4, PLA2G2D, TP53                                                                                                                                                            | 6.67E-03 | 8   |
|                                                                                                                                                                                |                                                            | BCL2L10, CTSA, CXCL1, EDNRA, FASLG, GMBF, GTF3CA, IQGAP1, NCK1, NMUR1, NR2F2, PLA2G1B, PL                                                                                                                       |          |     |
|                                                                                                                                                                                |                                                            | CE1, PPM1E, PPP1R12B, SELE, TRIM23                                                                                                                                                                              | 6.67E-03 | 17  |
| Neurological Disease, Skeletal and Muscular Disorders                                                                                                                          | neuromuscular disease                                      |                                                                                                                                                                                                                 | 6.71E-03 | 48  |
| Cell Death and Survival                                                                                                                                                        | apoptosis of leukemia cell lines                           | ACTN3, AEBP1, APLNR, ARHGEF1, B4GALT5, BCL11B, BCL6, BECN1, C4A, C4B, CCKBR, CHAT, COLGA                                                                                                                        | 6.79E-03 | 19  |
| Developmental Disorder, Hereditary Disorder, Metabolic Disease, Neurological Disease, Ophthalmic Disease, Organismal Injury and Abnormalities, Skeletal and Muscular Disorders | muscle-eye-brain disease                                   | L72, CPT1B, CXCL1, DKK3, DLG2, DRD3, FCGR2B, FHIT, GALNT3, HLA-DOB1, HLA-DRB1, HLA-                                                                                                                             |          |     |
| Molecular Transport, Small Molecule Biochemistry                                                                                                                               | release of histamine                                       | E, IL4, LDLR, LDLR, LEP, LMO1, MPR, NAPA, NEDD4, NOTCH4, OAS1, PDE1B, PDE4DIP, PPR1A, RPS                                                                                                                       |          |     |
| Dermatological Diseases and Conditions                                                                                                                                         | toxic epidermal necrolysis                                 | M8, SLC17, SSX2IP, STSIA3, THY1, TP53, TP13, TRIM31, TUBA1C, UBCE2D4, UCHL1                                                                                                                                     | 6.79E-03 | 48  |
| Cell Signaling, Molecular Transport, Vitamin and Mineral Metabolism                                                                                                            | mobilization of Ca2+                                       | BCL2A1, BCL2L10, BECN1, CSF2RA, DPP4, FASLG, FCER1A, HDAC6, IL4, KIR3DL1, KMT2A, NOTCH4, PI                                                                                                                     |          |     |
|                                                                                                                                                                                |                                                            | AS1, STAT5B, TGFBI, TOP1, TP53, TP73, TSC22D3                                                                                                                                                                   | 6.79E-03 | 19  |
|                                                                                                                                                                                |                                                            | B3GALNT2, LARGE, POMGN1                                                                                                                                                                                         | 6.81E-03 | 3   |
|                                                                                                                                                                                |                                                            | FCER1G, IL4, PRG3                                                                                                                                                                                               | 6.81E-03 | 3   |
|                                                                                                                                                                                |                                                            | C4A/C4B, FASLG, FCGR2B                                                                                                                                                                                          | 6.81E-03 | 3   |
|                                                                                                                                                                                |                                                            | C4A/C4B, CCL27, CCR6, CLEC4C, CXCL1, EDN1, FCER1A, FCER1G, FCGR2B, IL4, KIR2DS4 (includes                                                                                                                       |          |     |
|                                                                                                                                                                                |                                                            | others), NMUR1, PKN2, PLCE1, RHO, TP53                                                                                                                                                                          | 6.89E-03 | 16  |
|                                                                                                                                                                                |                                                            | AKAP1, ATIC, BA13, BRINP3, CAPN5, CD83, CDKN3, CS7, CXCL1, CXCL2, EYA4, FBLN2, FHIT, FOXG1, G                                                                                                                   |          |     |
|                                                                                                                                                                                |                                                            | ALNT3, GATA6, GNA11, GSR, HLA-                                                                                                                                                                                  |          |     |
|                                                                                                                                                                                |                                                            | E, HKK1, IFNLR1, ITGB1, ILKRC1, LDXL2, LTRB, MAP7, MCRS1, MMP2, MRC1, MYO3B, NTRK3, NUDT11,                                                                                                                     |          |     |
|                                                                                                                                                                                |                                                            | PCDH11Y, PTD42, RAPGEF4, RNF20, SELE, SEMA4D, SPRY1, ST18, STAT5B, TACSTD2, TAF1, TGFBI,                                                                                                                        |          |     |
|                                                                                                                                                                                |                                                            | THY1, TLK2, TOP1, TP53, TP73, TRRAP, TUBA1C, TUBB3, UCHL1, UHRF1BP1L                                                                                                                                            | 6.89E-03 | 54  |
|                                                                                                                                                                                |                                                            | FASLG, IL4, MYBL2, PIAS1, SHOX, TGFBI, TNFRSF10A, TP53, TRAF1                                                                                                                                                   | 6.92E-03 | 9   |
|                                                                                                                                                                                |                                                            | IL4, LEP, PITX2, TGFBI                                                                                                                                                                                          | 6.96E-03 | 4   |
|                                                                                                                                                                                |                                                            | BCL2A1, DUSP4, TGFBI, TNFRSF10A, TP53                                                                                                                                                                           | 6.99E-03 | 5   |
|                                                                                                                                                                                |                                                            | MMP2, PITX2, RHO, TLE1, TP53                                                                                                                                                                                    | 6.99E-03 | 5   |
|                                                                                                                                                                                |                                                            | ARPC1A, CFBF, CSTB, CXCL1, DDX39A, KPNB1, LDLR, OXSM, SULT2B1, TOP1, TWF1, ZFP36                                                                                                                                | 7.00E-03 | 12  |
|                                                                                                                                                                                |                                                            | FDPS, FLI1, TOP1, TP53, TUBA1C, TUBB3, USP1, WWOX                                                                                                                                                               | 7.11E-03 | 8   |
|                                                                                                                                                                                |                                                            | CD83, CXCL1, CXCL2, FHIT, GATA6, ITGBL1, MAP7, MRC1, MYO3B, SEMA4D, SPRY1, STAT5B, TACSTD                                                                                                                       |          |     |
|                                                                                                                                                                                |                                                            | 2, TGFBI, TP53, TP73, TUBA1C, TUBB3                                                                                                                                                                             | 7.13E-03 | 18  |
|                                                                                                                                                                                |                                                            | BCL2A1, BCL2L10, BECN1, CSF2RA, DPP4, FASLG, FCER1A, GPX4, HDAC6, HSF1, IL4, KIR3DL1, KMT2A                                                                                                                     |          |     |
|                                                                                                                                                                                |                                                            | , NOTCH4, PIAS1, STAT5B, TGFBI, TOP1, TP53, TP73, TSC22D3                                                                                                                                                       | 7.15E-03 | 21  |
|                                                                                                                                                                                |                                                            | DDOST, DPP4, DUSP3, FCER1G, KIR3DL1, NCK1, TGFBI, TLR9, TP53                                                                                                                                                    | 7.37E-03 | 9   |
|                                                                                                                                                                                |                                                            | BAP1, BCL11B, BCL6, BMP7, FHIT, IL4, TGFBI, TNFSF8, TOP1, TP53, TP73                                                                                                                                            | 7.43E-03 | 11  |



|                                                                                                                                                                                |                                             |          |                                                                                                            |    |
|--------------------------------------------------------------------------------------------------------------------------------------------------------------------------------|---------------------------------------------|----------|------------------------------------------------------------------------------------------------------------|----|
| Cellular Development                                                                                                                                                           | differentiation of tumor cell lines         | 7.45E-03 | B4GALNT1, BECN1, CBFB, DPP4, FLI1, FST, GREM1, IFNA5, KMT2A, LOXL2, NCK1, STS8IA2, TGFBI, THY1, TP73, USP1 | 16 |
| Infectious Disease                                                                                                                                                             | replication of virus                        | 7.48E-03 | ADAR, COLEC10, CTBP2, DLG2, DUSP3, EIF3C, FASLG, FDP5, HDAC6, HSF1, HTATSF1, IL4, KPNB1, ILG               | 30 |
| Cell Death and Survival                                                                                                                                                        | apoptosis of vascular endothelial cells     | 7.49E-03 | ALS9, LONP1, MGAT1, NAA10, NEK8, NHL1, OAS1, PPP1R8, RFFL, RPSA, RVBL2, SF3A1, SPRY2, TGF                  | 7  |
| Cell Cycle                                                                                                                                                                     | interphase of cervical cancer cell lines    | 7.49E-03 | B1, TLR9, TP53, TRIM2                                                                                      | 3  |
| Infectious Disease                                                                                                                                                             | production of virus                         | 7.49E-03 | AGGF1, CD39, FASLG, LEP, TGFBI, TNFRSF10A, TP53                                                            | 7  |
| Cellular Development, Hematopoiesis                                                                                                                                            | maturation of dendritic cells               | 7.87E-03 | CDKN3, MASTL, MFG, PITX2, PPP2R2A, SPRY2, TGFBI                                                            | 7  |
| Cellular Movement, Hematological System Development and Function, Immune Cell Trafficking, Inflammatory Response                                                               | chemotaxis of leukocytes                    | 7.97E-03 | POB, BECN1, LCP2, STATA5B, TAT, TLR9, TRIM22                                                               | 5  |
| Cellular Movement                                                                                                                                                              | cell movement of blood cells                | 8.06E-03 | CD83, FCGR2B, IL4, NFKB2, NGFR                                                                             | 15 |
| Cell Death and Survival                                                                                                                                                        | apoptosis of muscle cells                   | 8.07E-03 | CCL14, CCL24, CCL27, CSF2RA, CXCL1, CXCL2, DPP4, FASLG, GNA11                                              | 22 |
| Developmental Disorder, Hereditary Disorder, Metabolic Disease                                                                                                                 | congenital disorder of glycosylation type 1 | 8.13E-03 | C4A/C4B, CCL14, CCL24, CCL27, CCR8, CD36, CHST2, CSF2RA, CXCL1, CXCL2, DPP4, FASLG, GNA11                  | 6  |
| Cellular Movement, Hematological System Development and Function, Immune Cell Trafficking, Inflammatory Response                                                               | respiratory burst of myeloid cells          | 8.13E-03 | L4, LEP, LGALS9, PLA2G1B, SELE, SEMA4D, TGFBI, THY1, VIPR1                                                 | 22 |
| Cell Cycle                                                                                                                                                                     | cell cycle progression                      | 8.26E-03 | AGTR2, EDN1, FASLG, GATA6, TGFBI, TP53                                                                     | 4  |
| Cell Death and Survival                                                                                                                                                        | apoptosis of endothelial cells              | 8.35E-03 | ALG3, ALG6, DDOST, PGM1                                                                                    | 4  |
| Developmental Disorder, Hereditary Disorder, Metabolic Disease, Neurological Disease, Ophthalmic Disease, Organismal Injury and Abnormalities, Skeletal and Muscular Disorders | Walker-Warburg syndrome                     | 8.63E-03 | CXCL1, FCER1A, IL4, TGFBI                                                                                  | 4  |
| Cell Death and Survival                                                                                                                                                        | cell survival of lung cancer cell lines     | 8.63E-03 | BAP1, BCL6, BMP7, CDKN3, CUL7, DLG1, DRD3, DUSP3, EDN1, FBXO5, FLI1, HERC2, IL4, INVS, KMT2A, K            | 3  |
| Cell Morphology                                                                                                                                                                | conversion of cells                         | 8.63E-03 | PNB1, LEP, MAP9, MASTL, NAE1, NGFR, PCDH11Y, PHF13, PKN2, RBBP8, RNF167, RPL11, RPS24, SHO                 | 3  |
| Cellular Function and Maintenance, Hematological System Development and Function                                                                                               | function of T lymphocytes                   | 8.63E-03 | X, SPRY2, STIL, TAF1, TBC1D3 (includes others), TGFBI, TOP1, TP53, TP73, USP1, WWOX                        | 39 |
| Cell Cycle, Cellular Movement                                                                                                                                                  | cytokinesis                                 | 8.63E-03 | AGGF1, CD36, FASLG, GATA6, IL4, LEP, TGFBI, TNFRSF10A, TP53                                                | 9  |
| Molecular Transport, Protein Trafficking                                                                                                                                       | transport of protein                        | 8.63E-03 | B3GALNT2, LARGE, POMGNT1                                                                                   | 3  |
| Cell Cycle                                                                                                                                                                     | ploidy of cells                             | 8.63E-03 | FBXO5, TP53, TUBB3                                                                                         | 3  |
| Cancer, Dermatological Diseases and Conditions, Hematological Disease, Immunological Disease                                                                                   | ALK-positive anaplastic large cell lymphoma | 8.63E-03 | BCL6, TGFBI, TP53                                                                                          | 3  |
| Organismal Injury and Abnormalities                                                                                                                                            | apoptosis of antigen presenting cells       | 8.81E-03 | DLG1, LEP, TGFBI                                                                                           | 3  |
| Cell Death and Survival                                                                                                                                                        | metabolism of cholesterol                   | 8.81E-03 | BECN1, BIRC2, CETN2, GATA6, MAP9, MASTL, PKN2, PPP1CC, RAB35, TP53                                         | 10 |
| Lipid Metabolism, Small Molecule Biochemistry, Vitamin and Mineral Metabolism                                                                                                  | metabolism of cholesterol                   | 8.77E-03 | ADAR, BCL6, CD39, CTSA, HDAC6, KPNB1, M6PR, PPP1R10, RAB39P, RAPIA, TGFBI                                  | 11 |
|                                                                                                                                                                                |                                             | 8.81E-03 | EDN1, FBXO5, GATA6, MCRS1, PKD2, SPRY2, TP53                                                               | 7  |
|                                                                                                                                                                                |                                             | 8.81E-03 | HDAC6, PSMB2, PSMB5, PSDM1, TP53                                                                           | 5  |
|                                                                                                                                                                                |                                             | 8.81E-03 | FASLG, IL4, TGFBI, TLR9, TP53                                                                              | 5  |
|                                                                                                                                                                                |                                             | 8.81E-03 | APOB, IL4, LCAT, NPC1, NROB2                                                                               | 5  |
|                                                                                                                                                                                |                                             | 8.81E-03 | ADAR, APLNR, APOB, ARPC1A, BECN1, BICD2, C4A/C4B, CD36, CLNS1A, CLTA, COLEC10, CTBP2, DDO                  | 2  |
|                                                                                                                                                                                |                                             | 8.87E-03 | ST, DLG2, DPP4, DUSP5, EDNRA, EIF3C, FASLG, FCGR2B, FDP5, GPT, HDAC6, ILA                                  | 2  |
|                                                                                                                                                                                |                                             | 8.87E-03 | DOA, HSF1, HTATSF1, IL10RB, IL4, KPNB1, LCP2, LDLR, LGALS9, LONP1, MED20, MGAT1, MRC1, NAA10               | 10 |
|                                                                                                                                                                                |                                             | 8.87E-03 | , NEDD4, NEK8, NROB2, NHL1, NUDT11, OAS1, OSBP1, PGM1, PI3K, PIKY, PIK3CG, PKN2, POLR3A,                   | 11 |
|                                                                                                                                                                                |                                             | 8.87E-03 | PPP1R8, PPP2R2A, PPP2R5E, PSMB6, PSMC3, RFFL, RIMS4, RPL10A, RPL18, RPSA, RVBL2, SCARB1                    | 83 |
|                                                                                                                                                                                |                                             | 8.87E-03 | , SF3A1, SF3B2, SPRY2, SRSF6, STASB, TAT, TGFBI, THOC2, TLR9, TP53, TP73, TRIM22, TRIM44, TRIM             | 83 |
|                                                                                                                                                                                |                                             | 8.87E-03 | 62, TRP11, TUBA1C, TUBB3, TWRF1, USP26, VAMPS, VPS28                                                       | 8  |
|                                                                                                                                                                                |                                             | 9.37E-03 | BCL6, CD83, GSR, HNRNP1, RPSA, S100A10, STAT6, ZFP36                                                       | 8  |
|                                                                                                                                                                                |                                             | 9.43E-03 | EDN1, NMUR1, PLCE1, SELE                                                                                   | 4  |
|                                                                                                                                                                                |                                             | 9.43E-03 | FASLG, IL4, TGFBI, TLR9                                                                                    | 4  |
|                                                                                                                                                                                |                                             | 9.43E-03 | CXCL24, CSF2RA, CXCL1, CXCL2, FASLG, IL4, PLA2G1B, SELE, TGFBI                                             | 9  |
|                                                                                                                                                                                |                                             | 9.68E-03 | CXCL2, ICAM3, IL4, LGALS9, SELE, THY1                                                                      | 6  |
|                                                                                                                                                                                |                                             | 9.68E-03 | BMP7, MMP2, PITX2, RHO, TLE1, TP53                                                                         | 6  |
|                                                                                                                                                                                |                                             | 9.68E-03 | HDAC6, PSMB2, PSMB5, PSDM1, TP53, TUBB3                                                                    | 6  |
|                                                                                                                                                                                |                                             | 9.76E-03 | CD83, CXCL1, CXCL2, GATA6, ITGBL1, MAP7, MYO3B, SEMA4D, SPRY1, TACSTD2, TGFBI, TUBA1C, TU                  | 13 |
|                                                                                                                                                                                |                                             | 9.83E-03 | BBS3                                                                                                       | 5  |
|                                                                                                                                                                                |                                             | 9.83E-03 | CXCL1, CXCL2, FASLG, GPT, TGFBI                                                                            | 5  |
|                                                                                                                                                                                |                                             | 9.83E-03 | BCL6, IL4, MYBL2, SEMA4D, TGFBI                                                                            | 5  |
|                                                                                                                                                                                |                                             | 9.83E-03 | DUSP6, FDP5, FGF17, LEP, POLR3A                                                                            | 5  |
|                                                                                                                                                                                |                                             | 9.83E-03 | EDN1, FASLG, LGR4, TUBA1C, TUBB3                                                                           | 12 |
|                                                                                                                                                                                |                                             | 1.02E-02 | FASLG, IL4, MYBL2, NFKB2, NPC1, PIAS1, SHOX, TGFBI, TNFRSF10A, TP53, TP73, TRAF1                           | 12 |
|                                                                                                                                                                                |                                             | 1.07E-02 | FHIT, TP53                                                                                                 | 2  |
|                                                                                                                                                                                |                                             | 1.07E-02 | SELE, THY1                                                                                                 | 2  |
|                                                                                                                                                                                |                                             | 1.07E-02 | TP53, TP73                                                                                                 | 2  |
|                                                                                                                                                                                |                                             | 1.07E-02 | FUT9, SELE                                                                                                 | 2  |
|                                                                                                                                                                                |                                             | 1.07E-02 | CCR8, MMP2                                                                                                 | 2  |
|                                                                                                                                                                                |                                             | 1.07E-02 | TOP1, TP53                                                                                                 | 2  |
|                                                                                                                                                                                |                                             | 1.07E-02 | CSF2RA, IL4                                                                                                | 2  |
|                                                                                                                                                                                |                                             | 1.07E-02 | BCL6, NOTCH4                                                                                               | 2  |
|                                                                                                                                                                                |                                             | 1.07E-02 | HLA-E, LEP                                                                                                 | 2  |
|                                                                                                                                                                                |                                             | 1.07E-02 | ASA2, GBA2                                                                                                 | 2  |
|                                                                                                                                                                                |                                             | 1.07E-02 | B3GALT1, PITX2                                                                                             | 2  |
|                                                                                                                                                                                |                                             | 1.07E-02 | LONP1, TP53                                                                                                | 2  |
|                                                                                                                                                                                |                                             | 1.07E-02 | FDP5, MMP2                                                                                                 | 2  |
|                                                                                                                                                                                |                                             | 1.07E-02 | FCER1G, TLR9                                                                                               | 2  |
|                                                                                                                                                                                |                                             | 1.07E-02 | B4GALNT1, NEU3                                                                                             | 2  |
|                                                                                                                                                                                |                                             | 1.07E-02 | TOP1, TP53                                                                                                 | 2  |
|                                                                                                                                                                                |                                             | 1.07E-02 | ENTPD1, LEP                                                                                                | 2  |
|                                                                                                                                                                                |                                             | 1.07E-02 | PLA2G1B, PLA2G2D                                                                                           | 2  |
|                                                                                                                                                                                |                                             | 1.07E-02 | ALG6, B4GALT1, DDOST                                                                                       | 3  |
|                                                                                                                                                                                |                                             | 1.07E-02 | BCL6, IL4, TGFBI                                                                                           | 3  |
|                                                                                                                                                                                |                                             | 1.07E-02 | ADAR, OAS1, SPRY2                                                                                          | 3  |
|                                                                                                                                                                                |                                             | 1.07E-02 | CD36, MRC1, RPSA                                                                                           | 3  |
|                                                                                                                                                                                |                                             | 1.08E-02 | HDAC6, PSMB2, PSMB5, PSDM1                                                                                 | 4  |
|                                                                                                                                                                                |                                             | 1.08E-02 | GALT, NMUR1, PLA2G1B, PLA2G2D                                                                              | 4  |
|                                                                                                                                                                                |                                             | 1.08E-02 | CSF2RA, FASLG, FLI1, TGFBI, TP53                                                                           | 5  |
|                                                                                                                                                                                |                                             | 1.10E-02 | ADAR, POLR3A, TLR9, TRIM13, TRIM25, TRIM31, TRIM62                                                         | 7  |
|                                                                                                                                                                                |                                             | 1.12E-02 | CD83, CXCL1, EDN1, EDNRA, FCER1G, IL4, MGST2, OXSM, PLA2G1B, PLA2G2D, PRG3, TP53                           | 12 |
|                                                                                                                                                                                |                                             | 1.14E-02 | CCL14, CCL24, CCL27, CCR8, CHST2, CSF2RA, CXCL1, CXCL2, DPP4, FASLG, GNA11, IL4, LEP, LGALS9               | 20 |
|                                                                                                                                                                                |                                             | 1.14E-02 | , PLA2G1B, SELE, SEMA4D, TGFBI, THY1, VIPR1                                                                | 20 |
|                                                                                                                                                                                |                                             | 1.17E-02 | CCL14, CCL24, CSF2RA, CXCL1, CXCL2, FASLG, IL4, LGALS9, PLA2G1B, SELE, TGFBI, VIPR1                        | 12 |
|                                                                                                                                                                                |                                             | 1.19E-02 | CD83, CXCL1, EDN1, EDNRA, FCER1G, GPX4, IL4, PLA2G2D, TP53                                                 | 9  |
|                                                                                                                                                                                |                                             | 1.21E-02 | C4A/C4B, CSMD1, FCGR2B, MMP2, RNF111                                                                       | 5  |
|                                                                                                                                                                                |                                             | 1.21E-02 | APOB, BCL6, IL4, LEP, MYBL2, SEMA4D, TGFBI, TNFRSF9                                                        | 8  |
|                                                                                                                                                                                |                                             | 1.21E-02 | AKAP1, CCKBR, CCL24, CCR6, EDN1, EDNRA, ENTPD1, ENTPD2, GNA11, IL4, NMUR1, PLCL1, SELE, TG                 | 7  |
|                                                                                                                                                                                |                                             | 1.22E-02 | FBI, TP73                                                                                                  | 15 |
|                                                                                                                                                                                |                                             | 1.24E-02 | FHIT, PITX2, TGFBI, TP53                                                                                   | 4  |
|                                                                                                                                                                                |                                             | 1.24E-02 | FAM188A, PIAS1, RFFL, TP53                                                                                 | 5  |
|                                                                                                                                                                                |                                             | 1.25E-02 | BAP1, FAM188A, FHIT, PIAS1, RFFL, TP53                                                                     | 6  |
|                                                                                                                                                                                |                                             | 1.25E-02 | ARPC1A, BICD2, CLNS1A, CLTA, DDOST, DPP4, EDNRA, HLA-                                                      | 6  |
|                                                                                                                                                                                |                                             | 1.25E-02 | DOA, HTATSF1, KPNB1, LCP2, LGALS9, MED20, MGAT1, MRC1, NEDD4, NROB2, NUDT11, OSBP1, PG                     | 39 |
|                                                                                                                                                                                |                                             | 1.25E-02 | M1, PI3K, PIKY, PKN2, POLR3A, PPP2R2A, PPP2R5E, PSMB6, PSMC3, RIMS4, RPL10A, RPL18, SF3A1, S               | 39 |
|                                                                                                                                                                                |                                             | 1.27E-02 | FASLG, IL4, LTR, RAB35, TGFBI, TLR9, TNFRSF10A                                                             | 7  |
|                                                                                                                                                                                |                                             | 1.31E-02 | B4GALT5, FASLG, TP53                                                                                       | 3  |
|                                                                                                                                                                                |                                             | 1.25E-02 | infection by HIV-1                                                                                         |    |
| Cellular Movement, Hematological System Development and Function, Immune Cell Trafficking, Inflammatory Response                                                               | activation of antigen presenting cells      | 1.27E-02 |                                                                                                            |    |
| Cancer, Cell Death and Survival, Neurological Disease, Tumor Morphology                                                                                                        | apoptosis of glioma cells                   | 1.31E-02 |                                                                                                            |    |

|                                                                                                                                                                                                                          |                                                                                   |          |                                                                                                                                                                                                                                                                                                                                                                                                                                                                                                                                                                                                                                                                                                                                                                                                                                                                                                                                                                                                                                                                                                                                                                       |     |
|--------------------------------------------------------------------------------------------------------------------------------------------------------------------------------------------------------------------------|-----------------------------------------------------------------------------------|----------|-----------------------------------------------------------------------------------------------------------------------------------------------------------------------------------------------------------------------------------------------------------------------------------------------------------------------------------------------------------------------------------------------------------------------------------------------------------------------------------------------------------------------------------------------------------------------------------------------------------------------------------------------------------------------------------------------------------------------------------------------------------------------------------------------------------------------------------------------------------------------------------------------------------------------------------------------------------------------------------------------------------------------------------------------------------------------------------------------------------------------------------------------------------------------|-----|
| Connective Tissue Disorders, Dermatological Diseases and Conditions, Hematological Disease                                                                                                                               | idiopathic thrombocytopenic purpura                                               | 1.31E-02 | C4A/C4B,FASLG,FCGR2B                                                                                                                                                                                                                                                                                                                                                                                                                                                                                                                                                                                                                                                                                                                                                                                                                                                                                                                                                                                                                                                                                                                                                  | 3   |
| Cellular Development, Cellular Growth and Proliferation, Hematological System Development and Function                                                                                                                   | proliferation of helper T lymphocytes                                             | 1.31E-02 | HLA-DRB1,IL4,TGFB1                                                                                                                                                                                                                                                                                                                                                                                                                                                                                                                                                                                                                                                                                                                                                                                                                                                                                                                                                                                                                                                                                                                                                    | 3   |
| Endocrine System Development and Function, Lipid Metabolism, Small Molecule Biochemistry, Vitamin and Mineral Metabolism                                                                                                 | synthesis of estrogen                                                             | 1.31E-02 | BMP7,HSD3B1,LEP                                                                                                                                                                                                                                                                                                                                                                                                                                                                                                                                                                                                                                                                                                                                                                                                                                                                                                                                                                                                                                                                                                                                                       | 3   |
| Cardiovascular System Development and Function, Cell-To-Cell Signaling and Interaction, Tissue Development                                                                                                               | adhesion of vascular endothelial cells                                            | 1.36E-02 | B4GALNT2,CD36,IL4,LTBR,SELE,TGFB1,THY1<br>AC02,ALOXE3,APOB,ATP6V0A2,B3GALNT2,B4GALNT1,C10A,C10C,CEP41,CRBN,DGUOK,DPD4<br>ENPF1,FASLG,FDP5,GAL1,GATM,GBA2,GBB3,HDAC6,HERC2,ICK,IL10RB,IL4,INVS,LARGE,LDLR,<br>MMP2,NEK5,NHEJ1,NPH52,PGM1,POLR3A,POMGNT1,PSMB5,PSMB8,RPBP9,RHO,SLC4A11,STA<br>T5B,STIL,TGFB1,TP53,TTCC3,UCHL1,WWOX                                                                                                                                                                                                                                                                                                                                                                                                                                                                                                                                                                                                                                                                                                                                                                                                                                      | 7   |
| Hereditary Disorder                                                                                                                                                                                                      | autosomal recessive disease                                                       | 1.36E-02 |                                                                                                                                                                                                                                                                                                                                                                                                                                                                                                                                                                                                                                                                                                                                                                                                                                                                                                                                                                                                                                                                                                                                                                       | 46  |
|                                                                                                                                                                                                                          |                                                                                   |          | ABCC4,ACACA,ADAR,AGGF1,AGL,AGTR2,AGXT,ALG10,ANKFN1,APOB,ARHGEF1,ASAH2,ASNSD1<br>.ATIC,ATP6V0A2,B4GALNT1,B4GALNT1,BAG4,BAI3,BAP1,BCL11B,BCL6,BFAR,BIRC6,BMP7,BRE,B<br>RF1,BRINP3,CAPN5,CCR8,CD3G,CDCEP1,CDKN3,CNTN4,COLEC10,CSF2RA,CSMD1,CTBP2,CTC<br>FL,CXCL1,CYBBRA,CYP27C1,DDX39A,DPD4,DUSP21,DUSP3,EGSIT,EDNRA,EHBP1,ENPP1,EY4A,<br>FASLG,FHIT,FZD4,GALST2,GALNT3,GATA6,GBA2,GNA11,GPR171,GSE1,HERC2,HLA-<br>DOA,HRC,IDI1,IL4,INSM2,IQGAP1,KIAA1024,KIAA1755,KIR3DL1,KLRC3,KMT2A,KSR1,LARGE,LGAL<br>S9,LGR4,HLA,LMOD1,LOXL2,LRRFP1,M6PR,MAP6,MAP9,MCEE,MCM3,MCRS1,MGDGA2,MICAL1,<br>MMP2,MRS51,MYO3B,NAE1,NEURL1,NOTCH1,NPH52,NROB2,NTRK3,OAS1,OKSM,PCDHGA12,<br>PCDHGA8,PDE4DIP,PIAS1,PIGK,PIK3C2G,PLCL1,POMGNT1,PPM1E,PPP1R10,PPP1R12B,PPP1R<br>7,PSMB8,PSMC3,PTCH2,RPBP8,RICTOR,RIMS4,RNF111,RNF20,SELE,SEMA4D,SF3B2,SLC22A2<br>0,SLC22A3,SLC38A5,SMARCA11,SPRY1,SPRY2,SPPLC2,SRGAP3,SSX2IP,ST18,STAT5B,STK36,<br>SUPT5H,TACSTD2,TAI1,TAI1,TCF12D5,TJPS,TNFRSF10A,TOPI1,TP53,TRIM13,TRIM17,TRIM23,T<br>RIM26,TRRAP,TTCC37,TTCC38,TUBB3,UBE4B,UGT1A9 (includes<br>others),USP1,USP26,UTP20,VIPR1,VPS28,WNK3,XKR6,ZFP37,ZFR,ZHX2,ZNF208,ZNF449,ZNF507,<br>ZNF904A |     |
| Cancer, Gastrointestinal Disease                                                                                                                                                                                         | colon tumor                                                                       | 1.37E-02 | ZNF904A                                                                                                                                                                                                                                                                                                                                                                                                                                                                                                                                                                                                                                                                                                                                                                                                                                                                                                                                                                                                                                                                                                                                                               | 168 |
| Cancer, Hematological Disease, Immunological Disease, Organismal Injury and Abnormalities                                                                                                                                | angioimmunoblastic T-cell lymphoma                                                | 1.41E-02 | HDAC6,PSMB2,PSMB5,PSMD1                                                                                                                                                                                                                                                                                                                                                                                                                                                                                                                                                                                                                                                                                                                                                                                                                                                                                                                                                                                                                                                                                                                                               | 4   |
| Lipid Metabolism, Molecular Transport, Small Molecule Biochemistry                                                                                                                                                       | quantity of ceramide                                                              | 1.41E-02 | IL4,NGFR,SCARB1,SGPP1                                                                                                                                                                                                                                                                                                                                                                                                                                                                                                                                                                                                                                                                                                                                                                                                                                                                                                                                                                                                                                                                                                                                                 | 4   |
| Cellular Movement, Immune Cell Trafficking                                                                                                                                                                               | leukocyte migration                                                               | 1.46E-02 | C4A/C4B,CCL14,CCL24,CCL27,CCR8,CHST2,CSF2RA,CXCL1,CXCL2,DPD4,FASLG,GNA11,IL4,LE<br>P,LGAL,S9,PLA2G1B,SELE,SEMA4D,TGFB1,THY1,VIPR1                                                                                                                                                                                                                                                                                                                                                                                                                                                                                                                                                                                                                                                                                                                                                                                                                                                                                                                                                                                                                                     | 21  |
| Cell Death and Survival                                                                                                                                                                                                  | cell death of hematopoietic progenitor cells                                      | 1.47E-02 | FASLG,FLI1,HRK,TGFB1,TP53                                                                                                                                                                                                                                                                                                                                                                                                                                                                                                                                                                                                                                                                                                                                                                                                                                                                                                                                                                                                                                                                                                                                             | 5   |
| DNA Replication, Recombination, and Repair, Nucleic Acid Metabolism, Small Molecule Biochemistry                                                                                                                         | incorporation of thymidine                                                        | 1.47E-02 | EDN1,EDNRA,FASLG,NROB2,TGFB1                                                                                                                                                                                                                                                                                                                                                                                                                                                                                                                                                                                                                                                                                                                                                                                                                                                                                                                                                                                                                                                                                                                                          | 5   |
| Neurological Disease                                                                                                                                                                                                     | Movement Disorders                                                                | 1.50E-02 | ACTN3,AEBP1,APLN,ARHGEF1,B4GALT5,BCL11B,BCL6,BECN1,C4A/C4B,CKBR,CHAT,COLGA<br>LTZ,CPT1B,DKK3,DLG2,DRD3,FASLG,FDP5,GALNT3,IL4,KLRC1,KLRC3,LDHB,LDLR,LEP,LMOD1,<br>NAPA,NEDD4,PDE1B,PDE4DIP,PPP1R1A,PSMB8,SLC1A7,SSX2IP,ST8SIA3,TAI1,TGM6,THY1,TP5<br>3,TPH1,TPM3,TUBA1C,TUBB3,UBE2D4,UCHL1,WWOX                                                                                                                                                                                                                                                                                                                                                                                                                                                                                                                                                                                                                                                                                                                                                                                                                                                                        | 46  |
| Cellular Movement, Hair and Skin Development and Function                                                                                                                                                                | cell movement of epithelial cell lines                                            | 1.54E-02 | CCR8,CXCL1,FASLG,FUT9,NFKB2,PDE4DIP,SELE,TSC22D3                                                                                                                                                                                                                                                                                                                                                                                                                                                                                                                                                                                                                                                                                                                                                                                                                                                                                                                                                                                                                                                                                                                      | 8   |
| Neurological Disease, Psychological Disorders                                                                                                                                                                            | disorder of basal ganglia                                                         | 1.54E-02 | ACTN3,ADAR,AEBP1,APLN,ARHGEF1,B4GALT5,BCL11B,BCL6,BECN1,C4A/C4B,CKBR,CHAT,<br>COLGAL,T2,CPT1B,DKK3,DLG2,DRD3,GALNT3,IL4,LDHB,LDLR,LEP,LMOD1,NAPA,NEDD4,PDE1B,<br>PDE4DIP,PPP1R1A,PSMB8,SLC1A7,SSX2IP,ST8SIA3,TAI1,THY1,TP53,TPH1,TPM3,TUBA1C,TUBB<br>3,UBE2D4,UCHL1                                                                                                                                                                                                                                                                                                                                                                                                                                                                                                                                                                                                                                                                                                                                                                                                                                                                                                   | 41  |
| Cell Signaling                                                                                                                                                                                                           | G-protein signaling, coupled to IP3 second messenger (phospholipase C activating) | 1.57E-02 | CKBR,NMUR1,PLCE1                                                                                                                                                                                                                                                                                                                                                                                                                                                                                                                                                                                                                                                                                                                                                                                                                                                                                                                                                                                                                                                                                                                                                      | 3   |
| Carbohydrate Metabolism                                                                                                                                                                                                  | metabolism of oligosaccharide                                                     | 1.57E-02 | NEU5,ST8SIA3,ST8SIA4                                                                                                                                                                                                                                                                                                                                                                                                                                                                                                                                                                                                                                                                                                                                                                                                                                                                                                                                                                                                                                                                                                                                                  | 3   |
| Carbohydrate Metabolism, Small Molecule Biochemistry                                                                                                                                                                     | synthesis of proteoglycan                                                         | 1.57E-02 | CHST8,HS3ST3B1,TGFB1                                                                                                                                                                                                                                                                                                                                                                                                                                                                                                                                                                                                                                                                                                                                                                                                                                                                                                                                                                                                                                                                                                                                                  | 3   |
| Cell Death and Survival                                                                                                                                                                                                  | cell death of osteoclasts                                                         | 1.58E-02 | FASLG,TGFB1                                                                                                                                                                                                                                                                                                                                                                                                                                                                                                                                                                                                                                                                                                                                                                                                                                                                                                                                                                                                                                                                                                                                                           | 2   |
| Cell-To-Cell Signaling and Interaction, Hematological System Development and Function, Inflammatory Response                                                                                                             | cell-mediated response of T lymphocytes                                           | 1.58E-02 | IL4,LGAL,S9                                                                                                                                                                                                                                                                                                                                                                                                                                                                                                                                                                                                                                                                                                                                                                                                                                                                                                                                                                                                                                                                                                                                                           | 2   |
| Lipid Metabolism, Molecular Transport, Small Molecule Biochemistry                                                                                                                                                       | clearance of lipid                                                                | 1.58E-02 | LCAT,NPC1                                                                                                                                                                                                                                                                                                                                                                                                                                                                                                                                                                                                                                                                                                                                                                                                                                                                                                                                                                                                                                                                                                                                                             | 2   |
| Drug Metabolism, Endocrine System Development and Function, Lipid Metabolism, Molecular Transport, Small Molecule Biochemistry                                                                                           | concentration of testosterone                                                     | 1.58E-02 | LEP,LGR4                                                                                                                                                                                                                                                                                                                                                                                                                                                                                                                                                                                                                                                                                                                                                                                                                                                                                                                                                                                                                                                                                                                                                              | 2   |
| Cellular Development, Embryonic Development                                                                                                                                                                              | differentiation of embryonic stem cell lines                                      | 1.58E-02 | FST,TP53                                                                                                                                                                                                                                                                                                                                                                                                                                                                                                                                                                                                                                                                                                                                                                                                                                                                                                                                                                                                                                                                                                                                                              | 2   |
| Protein Synthesis                                                                                                                                                                                                        | expression of reporter protein                                                    | 1.58E-02 | TP53,TP73                                                                                                                                                                                                                                                                                                                                                                                                                                                                                                                                                                                                                                                                                                                                                                                                                                                                                                                                                                                                                                                                                                                                                             | 2   |
| Cell-To-Cell Signaling and Interaction, Inflammatory Response                                                                                                                                                            | immune response of dendritic cells                                                | 1.58E-02 | IL4,SCARB1                                                                                                                                                                                                                                                                                                                                                                                                                                                                                                                                                                                                                                                                                                                                                                                                                                                                                                                                                                                                                                                                                                                                                            | 2   |
| Cardiovascular System Development and Function, Hematological System Development and Function                                                                                                                            | mean arterial pressure                                                            | 1.58E-02 | AGTR2,EDN1                                                                                                                                                                                                                                                                                                                                                                                                                                                                                                                                                                                                                                                                                                                                                                                                                                                                                                                                                                                                                                                                                                                                                            | 2   |
| Cardiovascular System Development and Function, Nervous System Development and Function, Organ Morphology                                                                                                                | permeability of blood-brain barrier                                               | 1.58E-02 | LDLR,MMP2                                                                                                                                                                                                                                                                                                                                                                                                                                                                                                                                                                                                                                                                                                                                                                                                                                                                                                                                                                                                                                                                                                                                                             | 2   |
| RNA Post-Transcriptional Modification                                                                                                                                                                                    | selection of splice site                                                          | 1.58E-02 | SRSF6,SRSF9                                                                                                                                                                                                                                                                                                                                                                                                                                                                                                                                                                                                                                                                                                                                                                                                                                                                                                                                                                                                                                                                                                                                                           | 2   |
| Molecular Transport                                                                                                                                                                                                      | transport of bicarbonate                                                          | 1.58E-02 | SLC26A6,SLC4A11<br>ARPC1A,BICD2,C4A/C4B,CLNS1A,CLTA,DDOST,DPD4,EDNRA,FCGR2B,FDP5,HLA-<br>DOA,HTATSF1,IL4,KPNB1,LCP2,LGAL,S9,MED20,MGAT1,MRC1,NEDD4,NROB2,NUDT11,OSBP3,<br>PGM1,PIGK,PIGY,PKN2,POLR3A,PPP2R2A,PPP2R5E,PSMB6,PSMC3,RIMS4,RPL10A,RPL18,SF3A<br>1,SF3B2,SRSF6,THOC2,TRIM44,TRP11,TWF1,USP26                                                                                                                                                                                                                                                                                                                                                                                                                                                                                                                                                                                                                                                                                                                                                                                                                                                               | 2   |
| Infectious Disease                                                                                                                                                                                                       | HIV infection                                                                     | 1.59E-02 |                                                                                                                                                                                                                                                                                                                                                                                                                                                                                                                                                                                                                                                                                                                                                                                                                                                                                                                                                                                                                                                                                                                                                                       | 43  |
| Digestive System Development and Function, Gastrointestinal Disease, Hepatic System Development and Function, Hepatic System Disease, Infectious Disease, Inflammatory Disease, Inflammatory Response, Organ Development | hepatitis B                                                                       | 1.62E-02 | C4A/C4B,FCGR2B,IL10RB,TGFB1,TP73                                                                                                                                                                                                                                                                                                                                                                                                                                                                                                                                                                                                                                                                                                                                                                                                                                                                                                                                                                                                                                                                                                                                      | 5   |
| Cell Cycle                                                                                                                                                                                                               | interphase of carcinoma cell lines                                                | 1.62E-02 | BAP1,FAM188A,FHIT,RFFL,TP53                                                                                                                                                                                                                                                                                                                                                                                                                                                                                                                                                                                                                                                                                                                                                                                                                                                                                                                                                                                                                                                                                                                                           | 5   |
| Cellular Growth and Proliferation                                                                                                                                                                                        | cytostasis                                                                        | 1.66E-02 | BAP1,BCL11B,BCL6,BMP7,FHIT,HDAC6,IL4,IBC1D3 (includes<br>others),TGFB1,TNFSF3,TOPI1,TP53,TP73                                                                                                                                                                                                                                                                                                                                                                                                                                                                                                                                                                                                                                                                                                                                                                                                                                                                                                                                                                                                                                                                         | 13  |
| Cellular Development, Cellular Growth and Proliferation                                                                                                                                                                  | proliferation of leukemia cell lines                                              | 1.66E-02 | CDCP1,DUSP4,FLI1,GLMN,IL4,KMT2A,LEP,RNF20,STAT5B,TGFB1,TOPI1,TP53,WWOX                                                                                                                                                                                                                                                                                                                                                                                                                                                                                                                                                                                                                                                                                                                                                                                                                                                                                                                                                                                                                                                                                                | 13  |
| Infectious Disease                                                                                                                                                                                                       | replication of RNA virus                                                          | 1.73E-02 | ADAR,COLEC10,DLG2,DUSP3,EIF3C,FASLG,FDP5,HDAC6,HSF1,IL4,KPNB1,LGAL,S9,LONP1,MGA<br>T1,NAI1,NEK5,NTHL1,OAS1,PPP1R3,RFFL,RPSA,RUVBL2,SF3A1,TGFB1,TLR9,TP53,TRIM62                                                                                                                                                                                                                                                                                                                                                                                                                                                                                                                                                                                                                                                                                                                                                                                                                                                                                                                                                                                                       | 27  |
| Cancer                                                                                                                                                                                                                   | large-cell carcinoma                                                              | 1.77E-02 | ATIC,GALNT13,TP53,TUBA1C,TUBB3                                                                                                                                                                                                                                                                                                                                                                                                                                                                                                                                                                                                                                                                                                                                                                                                                                                                                                                                                                                                                                                                                                                                        | 5   |
| Developmental Disorder, Hereditary Disorder, Immunological Disease                                                                                                                                                       | severe combined immunodeficiency                                                  | 1.77E-02 | AK2,C4A/C4B,FCGR2B,IL4,NHEJ1                                                                                                                                                                                                                                                                                                                                                                                                                                                                                                                                                                                                                                                                                                                                                                                                                                                                                                                                                                                                                                                                                                                                          | 5   |
| Cell Death and Survival                                                                                                                                                                                                  | cell viability of lung cancer cell lines                                          | 1.77E-02 | BIRC6,FBXO5,NFKB2,RICTOR,RPSA,TP53,TUBB3                                                                                                                                                                                                                                                                                                                                                                                                                                                                                                                                                                                                                                                                                                                                                                                                                                                                                                                                                                                                                                                                                                                              | 7   |
| Lipid Metabolism, Small Molecule Biochemistry, Vitamin and Mineral Metabolism                                                                                                                                            | homeostasis of cholesterol                                                        | 1.79E-02 | APOB,LCAT,LDLR,NPC1                                                                                                                                                                                                                                                                                                                                                                                                                                                                                                                                                                                                                                                                                                                                                                                                                                                                                                                                                                                                                                                                                                                                                   | 4   |
| Cell Cycle                                                                                                                                                                                                               | arrest in G1 phase of carcinoma cell lines                                        | 1.86E-02 | FAM188A,RFFL,TP53                                                                                                                                                                                                                                                                                                                                                                                                                                                                                                                                                                                                                                                                                                                                                                                                                                                                                                                                                                                                                                                                                                                                                     | 3   |
| Developmental Disorder, Hereditary Disorder, Immunological Disease                                                                                                                                                       | complement component deficiency                                                   | 1.86E-02 | C1QA,C1QC,C4A/C4B                                                                                                                                                                                                                                                                                                                                                                                                                                                                                                                                                                                                                                                                                                                                                                                                                                                                                                                                                                                                                                                                                                                                                     | 3   |
| Lipid Metabolism, Small Molecule Biochemistry                                                                                                                                                                            | synthesis of prostaglandin D2                                                     | 1.86E-02 | EDN1,EDNRA,IL4<br>BRINP3,C4A/C4B,CRBN,CSMD1,CXCL1,DUSP4,FCGR2B,FDP5,GSR,HDAC6,HS6S1,KSR1,LCP2,<br>MMP2,NEK5,PSMB2,PSMB5,PSMB8,PSMD1,SCARB1,TP53,ZFP37                                                                                                                                                                                                                                                                                                                                                                                                                                                                                                                                                                                                                                                                                                                                                                                                                                                                                                                                                                                                                 | 22  |
| Hamatological Disease                                                                                                                                                                                                    | blood protein disorder                                                            | 1.90E-02 | AGGF1,CXCL1,GATA6,GNA11,KMT2A,LEP,NCK1,SELE,THY1                                                                                                                                                                                                                                                                                                                                                                                                                                                                                                                                                                                                                                                                                                                                                                                                                                                                                                                                                                                                                                                                                                                      | 9   |
| Cardiovascular System Development and Function, Cellular Movement                                                                                                                                                        | migration of vascular endothelial cells                                           | 1.91E-02 | ASMT,CNOT8,EIF3B,EIF3C,METAP1,NCK1,PRG3,RPL23,TGFB1,TP53,TP73                                                                                                                                                                                                                                                                                                                                                                                                                                                                                                                                                                                                                                                                                                                                                                                                                                                                                                                                                                                                                                                                                                         | 11  |
| Protein Synthesis                                                                                                                                                                                                        | expression of protein                                                             | 1.91E-02 | ATIC,BAI3,CDKN3,EY4A,FOXG1,GSR,HRK,KLRC1,MAP7,PTCH2,RAPGEF4,RNF20,ST18,TAI1,TGF<br>B1,TLK2,TOPI1,TP53,TP73,TRRAP                                                                                                                                                                                                                                                                                                                                                                                                                                                                                                                                                                                                                                                                                                                                                                                                                                                                                                                                                                                                                                                      | 20  |
| Cancer, Neurological Disease                                                                                                                                                                                             | central nervous system cancer                                                     | 1.91E-02 | AGGF1,ARHGEF4,BRINP3,C4A/C4B,CCL14,CCL24,CCL27,CCR8,CD36,CDCEP1,CHST2,CSF2RA,C<br>TBP2,CXCL1,CXCL2,DPD4,EDN1,EFNA5,FAM188A,FASLG,FBLN2,GATA6,GNA11,IL4,IQGAP1,KMT<br>2A,LEP,LGAL,S9,MMP2,NCK1,NFKB2,NOTCH4,NTRK3,PDE4DIP,PTX2,PLA2G1B,PLCL1,RAP1A,RI<br>CTOR,RNF20,RUVBL2,S100A10,SCARB1,SELE,SEMA4D,SGPP1,SPRY2,TACSTD2,TGFB1,THY1,T<br>P53,TP73,TPM3,TSC22D3,VIPR1,VPS28,WWOX                                                                                                                                                                                                                                                                                                                                                                                                                                                                                                                                                                                                                                                                                                                                                                                       | 57  |
| Cellular Movement                                                                                                                                                                                                        | migration of cells                                                                | 1.98E-02 | DPP4,FDP5,IL4,TGFB1                                                                                                                                                                                                                                                                                                                                                                                                                                                                                                                                                                                                                                                                                                                                                                                                                                                                                                                                                                                                                                                                                                                                                   | 4   |
| Hereditary Disorder, Respiratory Disease                                                                                                                                                                                 | Cystic Fibrosis                                                                   | 2.00E-02 |                                                                                                                                                                                                                                                                                                                                                                                                                                                                                                                                                                                                                                                                                                                                                                                                                                                                                                                                                                                                                                                                                                                                                                       | 5   |
| Cell-To-Cell Signaling and Interaction, Hematological System Development and Function, Inflammatory Response                                                                                                             | immune response of neutrophils                                                    | 2.00E-02 | CD36,CXCL1,FCER1A,IL4                                                                                                                                                                                                                                                                                                                                                                                                                                                                                                                                                                                                                                                                                                                                                                                                                                                                                                                                                                                                                                                                                                                                                 | 4   |
| Neurological Disease, Psychological Disorders, Skeletal and Muscular Disorders                                                                                                                                           | lewy body disease                                                                 | 2.00E-02 | BECN1,DRD3,NEDD4,UCHL1                                                                                                                                                                                                                                                                                                                                                                                                                                                                                                                                                                                                                                                                                                                                                                                                                                                                                                                                                                                                                                                                                                                                                | 4   |
| Cancer, Respiratory Disease                                                                                                                                                                                              | pleural mesothelioma                                                              | 2.00E-02 | ATIC,BAP1,TUBA1C,TUBB3                                                                                                                                                                                                                                                                                                                                                                                                                                                                                                                                                                                                                                                                                                                                                                                                                                                                                                                                                                                                                                                                                                                                                | 4   |
| Cell Death and Survival                                                                                                                                                                                                  | cell death of immune cells                                                        | 2.02E-02 | APOB,BCL6,CCR8,CXCL1,FASLG,FCER1A,IL4,LEP,LGAL,S9,MYBL2,NFKB2,SEMA4D,STAT5B,TGF<br>B1,TLR9,TNFSF8,TP53                                                                                                                                                                                                                                                                                                                                                                                                                                                                                                                                                                                                                                                                                                                                                                                                                                                                                                                                                                                                                                                                | 17  |
| Cell Cycle                                                                                                                                                                                                               | interphase of tumor cell lines                                                    | 2.06E-02 | BAP1,BMP7,CDKN3,DPD4,FAM188A,FHIT,IL4,MASTL,MGP,MYBL2,NAE1,PIAS1,PTX2,PPP2R2A,F<br>BFB8,RFFL,RPL11,RPL23,SPRY2,TGFB1,TP53                                                                                                                                                                                                                                                                                                                                                                                                                                                                                                                                                                                                                                                                                                                                                                                                                                                                                                                                                                                                                                             | 21  |
