# Supplementary material
Source: PubMed Central journal article supplement (PMC5484002)

# Supplementary Figure 2

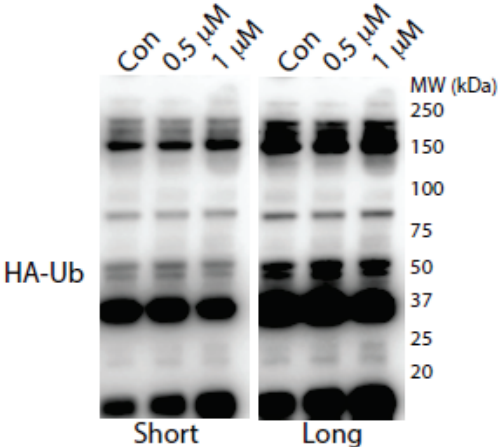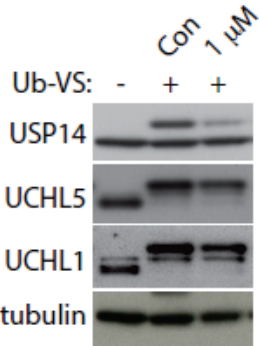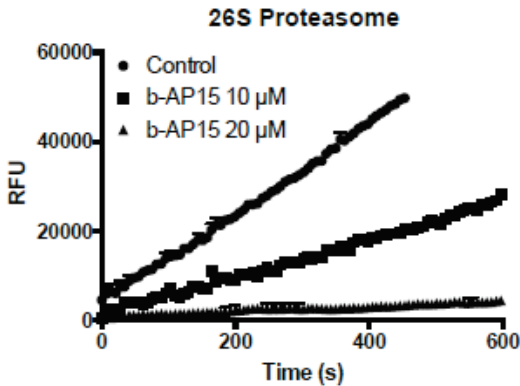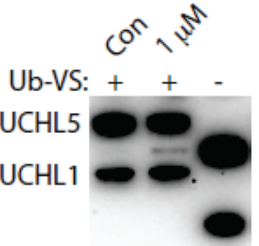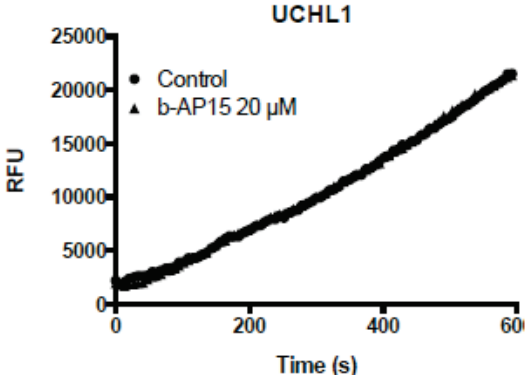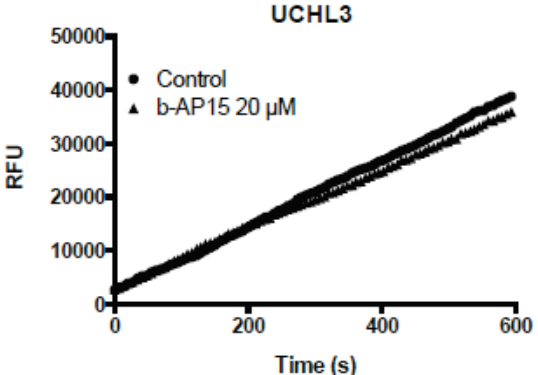

Supplement: NIHMS792011-supplement-2.pdf [file NIHMS792011-supplement-2.pdf]

Supplementary Figure 3

A

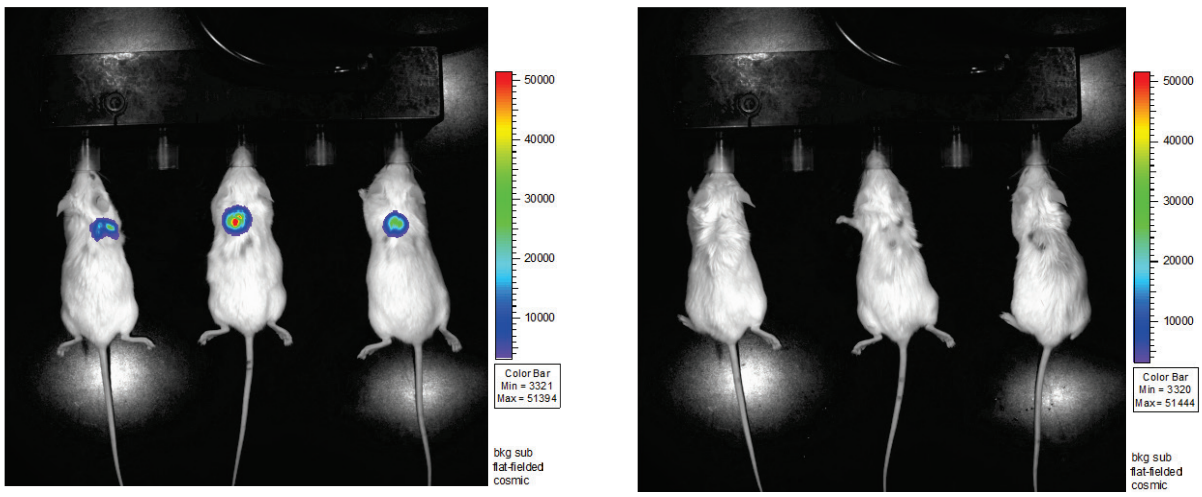

B

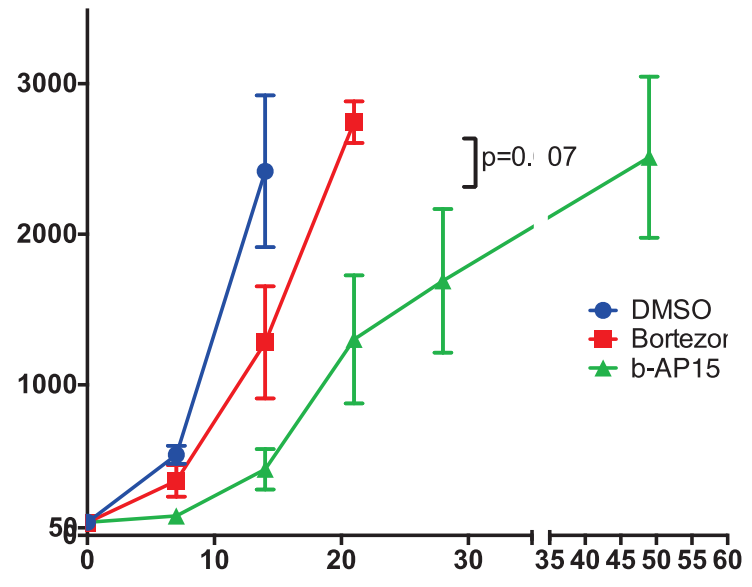

C

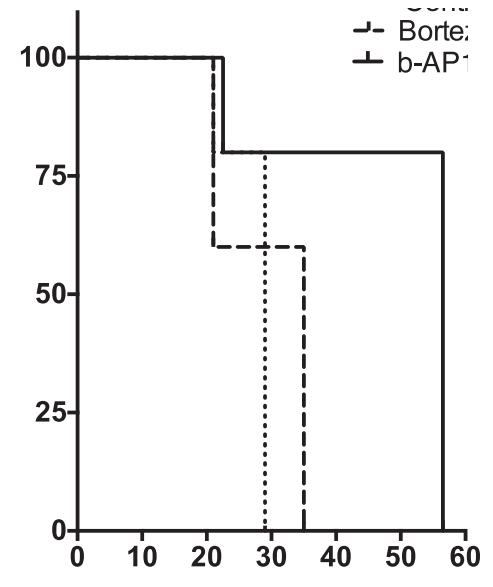

D

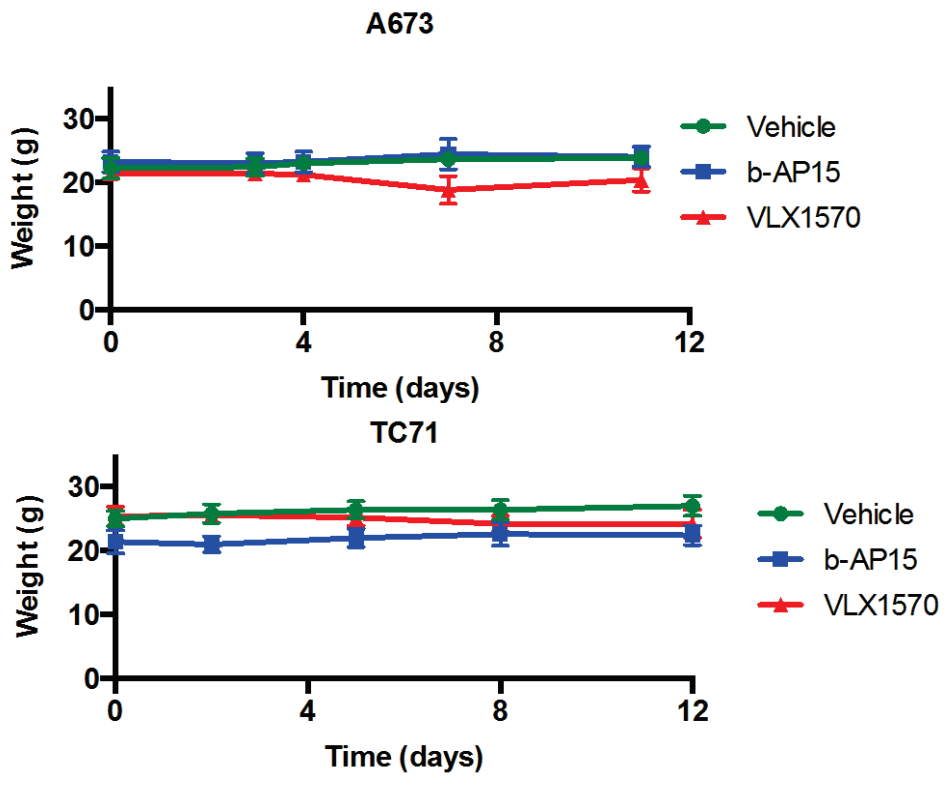

Supplement: NIHMS792011-supplement-3.pdf [file NIHMS792011-supplement-3.pdf]
